# Supplementary material for: Baseline for ostracod-based northwestern Pacific and Indo-Pacific shallow-marine paleoenvironmental reconstructions: ecological modeling of species distributions
Source: Copernicus journal article supplement (doi:10.5194/bg-2018-405), 2018-10-15
Supplement: Supplementary file [file bg-2018-405-AC4-supplement.pdf]

1 **Biogeosciences**

2 **Research Paper**

3

4 **Baseline for ostracod-based northwestern Pacific and Indo-Pacific shallow-**  
5 **marine paleoenvironmental reconstructions: ecological modeling of species**  
6 **distributions**

7

8 Yuanyuan Hong<sup>1,2,\*</sup>, Moriaki Yasuhara<sup>1,2,\*</sup>, Hokuto Iwatani<sup>1,2</sup>, Briony Mamo<sup>1,2</sup>

9

10

11 <sup>1</sup>School of Biological Sciences, The University of Hong Kong, Pok Fu Lam Road,  
12 Hong Kong SAR, China

13 <sup>2</sup>Swire Institute of Marine Science, The University of Hong Kong, Cape d'Aguiar  
14 Road, Shek O, Hong Kong SAR, China

15

16 \*Corresponding authors: Hong, Y.Y. (oocirclr@gmail.com); Yasuhara, M.  
17 (moriakiyasuhara@gmail.com).

18

19

20

21

22

23

24

25

26

27

28 Abstract:

29 Fossil ostracods have been widely used for Quaternary paleoenvironmental  
30 reconstructions especially in marginal marine environments (e.g. for water depth,  
31 temperature, salinity, oxygen levels, pollution). But our knowledge of indicator  
32 species autoecology, the base of paleoenvironmental reconstructions, remains limited  
33 and commonly lacks robust statistical support and comprehensive comparison with  
34 environmental data. We analysed marginal marine ostracod taxa at 52 sites in Hong  
35 Kong for which comprehensive environmental data are available. We applied linear  
36 regression models to reveal relationships between species distribution and  
37 environmental factors for 18 common taxa (mainly species, a few genera) in our  
38 Hong Kong dataset, and identified indicator species of environmental parameters. For  
39 example, *Sinocytheridea impressa*, widely distributed euryhaline species throughout  
40 the East and South China Seas and the Indo-Pacific, indicates eutrophication and  
41 bottom-water hypoxia. *Neomonoceratina delicata*, widely known species from  
42 nearshore and estuarine environments in the East and South China Seas, and the Indo-  
43 Pacific, indicates heavy-metal pollution and increased turbidity. The 18 taxa used for  
44 this study are widely distributed geographically and divided into Widespread  
45 (throughout the northwestern Pacific and Indo-Pacific regions), Temperate [South  
46 China Sea to Russia (Sea of Japan coast) and Japan], Subtropical (Indo-Pacific to the  
47 East China Sea), Tropical (Indo-Pacific and South China Sea), and Globally  
48 Distributed Groups. With statistical support from ecological modeling and  
49 comprehensive environmental data, these results provide a robust baseline for

50 ostracod-based Quaternary-Anthropocene paleoenvironmental reconstructions in the  
51 tropical–extratropical northwestern Pacific and Indo-Pacific widely.

52

53 Key words: Autoecology, Distribution modeling, Indicator species, Ostracoda,  
54 Paleoenvironmental reconstruction, Proxy.

55

## 56 **Key points**

57 1. We provide a robust baseline for ostracod-based (microscopic Arthropods)  
58 paleoenvironmental reconstructions from Quaternary and Anthropocene marginal  
59 marine sediments.

60 2. The studied species have wide distributions over the tropics and extratropics of the  
61 northwestern Pacific and Indo-Pacific.

62 3. Ecological modeling established reliable indicator ostracod species for  
63 paleoenvironmental reconstructions.

64

65

66

## 67 **1. Introduction**

68 Because of their small size, high abundance and excellent fossil record, fossil  
69 ostracods (microcrustaceans), have been widely used to reconstruct Quaternary  
70 environmental conditions including water-depth, salinity, temperature, oxygen, and  
71 pollution, especially in marginal marine sediments (Boomer & Eisenhauer, 2002;  
72 Cronin, 2015; Frenzel & Boomer, 2005; Horne et al., 2012; Ruiz et al., 2005). In the  
73 northwestern Pacific and Indo-Pacific there are numerous deltas (Woodroffe et al.,  
74 2006) hosting accumulated Holocene marine sediments. Many studies have

75 reconstructed the depositional environments of these sediments (Alberti et al., 2013;  
76 Dong et al., 2012; Irizuki et al., 2015b; Tanaka et al., 2011; Yasuhara & Seto, 2006;  
77 Yasuhara et al., 2005; Zhou et al., 2015). Due to high sedimentation rates ( $> 1$  cm per  
78 year), fossil ostracods allow the high-resolution reconstruction of human-induced  
79 environmental changes (pollution, eutrophication, bottom oxygen depletion) over the  
80 past century (Irizuki et al., 2011; Irizuki et al., 2015a; Irizuki et al., 2018; Yasuhara et  
81 al., 2003; Yasuhara et al., 2007).

82

83 Many have evaluated the autoecology of ostracod indicator species as the  
84 basis for paleoenvironmental reconstructions (Hazel, 1988; Irizuki et al., 2003; Ozawa  
85 et al., 2004; Stepanova et al., 2003; Wang et al., 1988; Yasuhara & Seto, 2006; Zhao,  
86 1984; Zhao & Wang, 1988a, 1988b). Yet these studies tend to focus on only one or a  
87 few targeted environmental factor(s) and lack rigorous statistical evaluation,  
88 particularly statistical modeling, a common approach in contemporary ecology. This  
89 is probably due to the fact that comprehensive environmental datasets are often  
90 unavailable and an ecological modeling approach (especially regression modeling and  
91 model selection) has not been common in this field of micropaleontology.

92

93 Hong Kong constitutes an ideal location for a marine ecological modeling  
94 approach in the northwestern Pacific and Indo-Pacific regions because of extensive  
95 and intensive marine environmental monitoring program and subtropical location  
96 where tropical and temperate species coexist. This program provides robust datasets  
97 for ecological modeling, and the subtropical location allows the investigation of  
98 species with different latitudinal and geographical distributions. We employed  
99 regression modeling of Hong Kong shallow-marine ostracod species to show

100 statistical relationships between species abundance, distribution and environmental  
101 factors. This study allows the autoecology and statistical evaluation of common  
102 tropical and extratropical species, providing a baseline for ostracod-based shallow-  
103 marine paleoenvironmental reconstructions of the northwestern Pacific and Indo-  
104 Pacific regions.

105

## 106 **2. Study area**

107 Hong Kong is situated at the southeastern corner of the Pearl River (Zhujiang) Delta,  
108 and has an area of 2500 km<sup>2</sup> (Fig. 1), at 22° 12.021' to 22° 33.817' N latitude, 113°  
109 53.388' to 114° 26.920' E longitude. It is an ideal location to study natural and/or  
110 anthropogenic impacts on benthic communities due to its complex hydrology and  
111 long history of human influence. Western Hong Kong is affected by input from the  
112 Pearl River, particularly during the summer heavy rainfall (Morton & Wu, 1975),  
113 when surface water salinity is strongly influenced by rainfall. Eastern Hong Kong  
114 waters are mainly marine and derived from the South China Sea. As one of the most  
115 urbanized coastal areas in the world, human activities including rapid industrialization,  
116 sewage discharge, trawling, dredging and land reclamation have led to a deteriorated  
117 marine benthic ecosystem (Blackmore, 1998; Hodgkiss & Yim, 1995; Hong et al.,  
118 2017; Hu et al., 2008; Morton, 1996; Morton & Blackmore, 2001; Owen & Sandhu,  
119 2000; Shin, 1977; Tanner et al., 2000).

120

## 121 **3. Materials and Methods**

### 122 **3.1. Samples and laboratory procedure**

123 In January and July of 2011 we used a Van Veen Grab to collect 100 ml of sediment  
124 from the uppermost centimeter of the sea floor from 52 sites in Hong Kong marine

125 waters (Fig. 1; Supplement A), 41 of which are in open waters and 11 in typhoon  
126 shelter sites. Typhoon shelters are semi-enclosed areas of water designed to protect  
127 moored vessels in extreme weather (Environmental Protection Department, 2011). All  
128 sites are included in the Hong Kong EPD marine water and sediment quality  
129 monitoring program, which has been conducted monthly since 1986 (for water) and  
130 biannually (for sediment), providing comprehensive environmental data for all  
131 stations (see below).

132 Sediments were wet-sieved over a 63  $\mu\text{m}$  mesh sieve and air dried or oven-  
133 dried at 40 °C. The residue was dry-sieved over a 150  $\mu\text{m}$  mesh sieve, and ostracod  
134 specimens larger than 150  $\mu\text{m}$  were picked; smaller individuals are mostly early instar  
135 juveniles that are often not preserved (because their shells are usually thin and  
136 delicate) or difficult to identify (see Yasuhara et al., 2009 and Yasuhara et al., 2017  
137 for more details). In samples containing fewer than 200 specimens, we picked all  
138 individuals. If there were more than 200 specimens, we picked ostracods from a split.  
139 We identified each counted specimen to species level when possible. We considered  
140 both an entire carapace or a single valve as one individual for counting.

141

### 142 **3.2 Environmental Variables**

143 We selected parameters from the EPD monitoring program (Table 1) for our  
144 regression modeling (see below), including surface productivity (Chlorophyll-a, Chl;  
145 Fig. 2), water depth (D; Fig. 2), bottom water dissolved oxygen (DO; Fig. 2), bottom  
146 water salinity (Sal; Fig. 2), turbidity (Tur; Fig. 2), summer bottom water temperature  
147 (ST – June to September average; Fig. 2), winter bottom water temperature (WT –  
148 November to February average; Fig. 2), mud content (MD; Fig. 2), and heavy metal  
149 concentration (Cu, Zn, and Pb; Fig. 3). These parameters are known to control

150 ostracod faunal properties (Cronin, 2015; Cronin & Vann, 2003; Hazel, 1988; Ikeya  
151 & Shiozaki, 1993; Irizuki et al., 2005; Irizuki et al., 2015a; Irizuki et al., 2018; Ruiz et  
152 al., 2005; Yasuhara et al., 2007; Yasuhara et al., 2012b). We used averages over the  
153 entire monitoring period (1986–2011), because the ostracods in this study were  
154 mostly dead shells, thus the samples should be considered time averaged. Bottom  
155 water DO is the average of the summer season (June–September), due to the likely  
156 importance of summer bottom water oxygen depletion.

157

#### 158 **4. Regression modeling**

159 Multiple linear regression modeling was used to determine the relationship between  
160 common ostracod species (relative abundance of each species) and environmental  
161 parameters (Supplement B). All environmental parameters were log-transformed and  
162 zero centered. Salinity outliers (salinity <25: DS2 and DS3) and samples with low  
163 abundance (<50 specimens: ES5, MS7, VS21, VS5 & VS6) were removed from the  
164 models.

165         The best-fitting models were selected based on Akaike’s Information Criterion  
166 (AICc) for small sample size, in which the lower score indicates the better model  
167 support considering both goodness-of-fit and model complexity (Anderson &  
168 Burnham, 2002). Akaike weights were used to summarize proportional support for all  
169 candidate models (Anderson et al., 2000) (Table 2). We considered parameter  
170 estimates averaged over models, proportional to the support that each model received  
171 (Anderson et al., 2000) (Table 3). This approach accounts for the uncertainty in model  
172 selection and thus leads to appropriately broader confidence intervals than obtained  
173 by relying only on the single, best-supported model. The relative importance of  
174 various predictor variables was measured by the sum of Akaike weights of models

175 that included the variables in question (Brunham & Anderson, 2002).

176 We explored linear dependencies by computing variance inflation factors (VIF)  
177 (Legendre & Legendre, 1998) and pairwise correlations between predictor variables  
178 to assess whether multicollinearity was likely to influence regression results  
179 (Yasuhara et al., 2012b). The degree of freedom is more than one for the geographic  
180 region variable (see below), thus we computed generalized variance inflation factors  
181 (GVIF). For continuous variables, GVIF (Table 4) is the same as VIF, but for  
182 categorical variables, GVIF has degrees of freedom (Df) equal to the number of  
183 coefficients associated with it (Hendrickx et al., 2004). Thus, we used  $GVIF^{1/2df}$  to  
184 make GVIF values comparable among those with different Df.  $VIF > 20$  is usually  
185 indicative of high collinearity (Legendre & Legendre, 1998). Thus we calculated an  
186 equivalent threshold of 4.47 (equal to  $\sqrt{20}$ ) for  $GVIF^{1/2df}$  to assess conlinearity. Also,  
187 adjusted  $R^2 > 0.8$  indicates a strong correlation of variables (Hoffman, 2015). In all  
188 datasets, summer temperature (ST) and copper (Cu) were highly correlated  
189 ( $R^2=0.8217$ ), and the GVIFs of ST and Cu are  $> 20$ , indicating that these correlations  
190 may influence regression results. Thus, we re-ran the linear regression modeling  
191 without ST and Cu. The new GVIFs of all variables were under 4.47 (Table 4).

192 We considered the degree of spatial autocorrelation in model residuals by the  
193 calculation of Moran's *I* index for the five best models. The neighborhood size was  
194 set as 2, 5, 10, 20 and 50 km. We found significant spatial autocorrelation in model  
195 residuals for many cases, thus we forced the geographic region variable (R) (Water  
196 Control Zones defined by EPD) to be included in all models. After this treatment,  
197 spatial autocorrelation was detected only in a few models for *Propontocypris* spp.,  
198 *Stigmatocythere roesmani*, and *Hemikrithe orientalis*.

199 The multiple linear regression model analyses were implemented in R



200 programming language (R Core Team, 2016). We used 'M<sub>U</sub>MI<sub>N</sub>' (Bartoń, 2013) for  
201 model averaging and 'SPDEP' (Bivand & Piras, 2015) to measure spatial  
202 autocorrelation.

203

## 204 **5. Results and discussions**

205 The comprehensive ostracod dataset for the 52 sites and the environmental variables  
206 enabled us to elucidate distribution patterns of common ostracod taxa and their related  
207 environmental factor(s). We identified 151 species belonging to 76 genera  
208 (Supplement A). Among them, 18 common taxa (mainly species, a few genera) of  
209 *Pistocythereis bradyi*, *Bicornucythere bisanensis* s.l., *Nipponocythere bicarinata*,  
210 *Spinileberis quadriaculeata*, *Phlyctocythere japonica*, *Loxoconcha epeterseni*,  
211 *Sinocytheridea impressa*, *Neomonoceratina delicata*, *Keijella kloempritis*,  
212 *Neosinocythere elongata*, *Stigmatocythere roesmani*, *Hemicytheridea reticulata*  
213 *Loxoconcha malayensis*, *Alocopocythere goujoni*, *Hemikrithe orientalis*,  
214 *Propontocypris* spp., *Neonesidea* spp. and *Xestoleberis* spp. (Supplement B) were  
215 used for regression modelling, and their relative abundances (to the total ostracod  
216 abundance in a sample) show a significant relation with environmental parameters.  
217 The best three regression models are presented in Table 2 and the model-averaged  
218 parameter estimates in Table 3. A small percentage of specimens of phytal genera  
219 (e.g., *Xestoleberis* spp., *Neonesidea* spp.) were contained in each sample, which are  
220 basically allochthonous specimens in bottom sediments transported from surrounding  
221 phytal environments. The value of allochthonous species to environmental  
222 interpretation is limited, however most ostracod specimens in each sample are  
223 composed of benthic, muddy sediment dwellers which are considered autochthonous.

224

225 Ostracods were divided into four groups based on their geographic  
226 distributions, including Widespread Group; Temperate Group; Subtropical Group;  
227 and Tropical Group; and Globally distributed Group (Fig. 4).

228

229

230 **a. Widespread Group**

231 Only one species *Pistocythereis bradyi* constitutes Widespread Group.  
232 *Pistocythereis bradyi* is widely distributed throughout the marginal marine  
233 environments of Japan, the East and South China Seas, and the Indo-Pacific (Fig. 4).  
234 Relative abundance of *P. bradyi* was highly correlated with salinity (positive), water  
235 depth (negative) and Pb (negative) (Tables 2 and 3). This indicates the species prefers  
236 relatively shallow environments with high salinity (Figs. 2 and 5). In the Pearl River  
237 Delta and shallow South China Sea (Fig. 4), *P. bradyi* is dominant along the inner  
238 continental shelf at water depths <100 m (mostly common between 10–50 m), and at  
239 salinities from 30–40 (Li, 1985; Zhao & Wang, 1990; Zhao et al., 1986).  
240 *Pistocythereis bradyi* is a typical middle muddy bay species in Japan (Irizuki et al.,  
241 2006; Yasuhara & Irizuki, 2001; Yasuhara & Seto, 2006), and known from open bays  
242 such as Gamagyang Bay in Korea (Abe, 1988) and Malacca Strait (Whatley & Zhao,  
243 1988b). In these studies, *P. bradyi* prefers relatively high salinity and deeper water in  
244 the inner continental shelf (Tables 2 and 3). Our data agree as to the preference for  
245 high salinity, but inconsistent with the literature regarding shallower water depths.  
246 Salinity may be more important than depth, but the restricted depth range of our sites  
247 ( $\leq 35$  m) may also be a reason for this inconsistency. Our results indicate that *P.*  
248 *bradyi* is sensitive to metal pollution.

249

250 **b. Temperate Group**

251 Five species including *Bicornucythere bisanensis* s.l., *Nipponocythere*  
252 *bicarinata*, *Spinileberis quadriaculeata*, *Phlyctocythere japonica* and *Loxoconcha*  
253 *epeterseni* are distributed from Japan-Russian Coast to South China Sea.

254 *Bicornucythere bisanensis* s.l. is very common in most samples, the relative  
255 abundance of which was significantly correlated with water depth (negative) (Tables  
256 2 and 3) and this species prefers shallower environments (Figs. 2 and 5). In Chinese  
257 and Japanese coastal areas, *B. bisanensis* s.l. is abundant in brackish water (salinity:  
258 20–30) at depths less than 10 m (Ikeya & Shiozaki, 1993; Irizuki et al., 2006; Zhao et  
259 al., 1986). Our results confirm this preference for shallow depths. In Japan,  
260 *Bicornucythere bisanensis* is tolerant of anthropogenic impacts, especially  
261 eutrophication and the resulting bottom water hypoxia (Irizuki et al., 2003; Irizuki et  
262 al., 2011; Irizuki et al., 2015a; Irizuki et al., 2018; Yasuhara et al., 2003; Yasuhara et  
263 al., 2007; Yasuhara et al., 2012a). We did not see a significant relation between  
264 relative abundance and metal concentration, productivity, or dissolved oxygen.  
265 Possibly, the more dominant presence of *S. impressa* and *N. delicata*, that are neither  
266 dominant or distributed throughout most of Japan, could explain this difference.  
267 These species may have a higher tolerance than *B. bisanensis* s.l.. Another  
268 explanation may be that different morphotypes have different ecological preferences  
269 (Abe, 1988), and only Form A is known to be tolerant to eutrophication and bottom-  
270 water oxygen depletion (Irizuki et al., 2011; Irizuki et al., 2015a; Irizuki et al., 2018;  
271 Yasuhara & Yamazaki, 2005; Yasuhara et al., 2007). Form A is less abundant in  
272 Hong Kong, and due to the difficulty of juvenile identification, we did not divide *B.*  
273 *bisanensis* into morphotypes. *Bicornucythere bisanensis* s.l. is widely distributed  
274 throughout marginal marine environments around Japan, Russia (Sea of Japan coast),  
275 and the East and South China Seas (Fig. 4).

276 Relative abundance of *N. bicarinata* correlated with productivity (negative)  
277 (Tables 2 and 3). This is a typical middle bay species in Japan (Irizuki et al., 2006),  
278 abundant on muddy substrates at water depths >10 m (Yasuhara & Seto, 2006;  
279 Yasuhara et al., 2005). We found *N. bicarinata* to be sensitive to eutrophication,  
280 preferring lower productivity (Figs 2 and 5). This species is known from marginal  
281 marine environments around Japan and the East and South China Seas (Fig. 4).

282 Relative abundance of *S. quadriaculeata* correlated to productivity (positive),  
283 and turbidity (negative) (Tables 2 and 3). This is a typical inner muddy bay species in  
284 Japan (Irizuki et al., 2006), which prefers silty substrates in brackish waters, at  
285 salinities from 20–30, and water depths of 2–7 m (Ikeya and Shiozaki, 1993). This  
286 study shows a preference for waters with higher productivity but relatively low  
287 turbidity (Tables 2 and 3), so that the species is abundant in Tolo Harbour (higher  
288 productivity, lower turbidity) but not in Deep Bay (higher turbidity) (Figs. 2 and 5).  
289 *Spinileberis quadriaculeata* is not tolerant to seasonal anoxia or oxygen depletion (0–  
290 1 mg/L) in Uranouchi Bay, Japan (Irizuki et al., 2008), but we do not find a  
291 significant correlation with dissolved oxygen content, probably due to the relatively  
292 high bottom-water oxygen content (2.96–6.84 mg/L) in Hong Kong (Fig. 2;  
293 Supplement B). *Spinileberis quadriaculeata* is widely distributed in marginal marine  
294 environments around Japan, Russia (Sea of Japan coast), and the East and South  
295 China Seas (Fig. 4).

296 Relative abundance of *P. japonica* correlated with water depth (positive)  
297 (Tables 2 and 3). This species is known from relatively deeper waters (>40 m) in the  
298 East China Sea (Ishizaki, 1981; Wang et al., 1988). At our sites, it has its greatest  
299 abundance at the deeper southern sites (Fig. 5). *Phlyctocythere japonica* is distributed  
300 around Japan (Yasuhara et al., 2002) and the East and South China Seas (Fig. 4).

301 Similarly to *P. japonica*, relative abundance of *L. epeterseni* correlated with water  
302 depth (positive), and turbidity (negative) (Tables 2 and 3). It occurs in the southern  
303 and eastern, deeper and less turbid regions of Hong Kong waters, but the trend is not  
304 very clear (Figs 2 and 5). This species is also known from the deeper parts of Osaka  
305 Bay (Yasuhara & Irizuki, 2001) and marginal marine environments around Japan  
306 (Ishizaki, 1968), the East China Sea (Yang et al., 1982), and the South China Sea  
307 (Cao, 1998) (Fig. 4). This species is reported as *Loxoconcha modesta* in Hou & Gou  
308 (2007), and also has been misidentified as *Loxoconcha viva* and *Loxoconcha sinensis*  
309 (Hou & Gou, 2007). Ishizaki (1968) described *Loxoconcha laeta* and *Loxoconcha*  
310 *modesta*, but these are the females and males of the same species (Ikeya et al., 2003).  
311 Ishizaki (1981) gave the new species names *Loxoconcha epeterseni* and *Loxoconcha*  
312 *tosamodesta* for *Loxoconcha laeta* and *Loxoconcha modesta*, respectively, because  
313 these names were junior homonyms. Since *Loxoconcha laeta* (= *epeterseni*) appears  
314 earlier than *Loxoconcha modesta* (= *tosamodesta*) in the original description (Ishizaki,  
315 1968), we use the name *Loxoconcha epeterseni* for this species (e.g., see Ikeya et al.,  
316 2003).

317

318

319 **c. Subtropical Group**

320 Six species including *Sinocytheridea impressa*, *Neomonoceratina delicata*,  
321 *Keijella kloempritsensis*, *Neosinocythere elongata*, *Stigmatocythere roesmani* and  
322 *Hemicytheridea reticulata* are reported from the East China Sea to Indo-Pacific area.

323 *Sinocytheridea impressa* [= *Sinocytheridea latiovata*; see Whatley and Zhao  
324 (1988a)] is the most dominant species, the relative abundance of which was  
325 significantly correlated with salinity (negative), dissolved oxygen (negative), mud  
326 content (positive) and productivity (positive) (Tables 2 and 3). This species is

327 noticeably dominant in areas characterized by a muddy bottom including northern  
328 Mirs Bay, Port Shelter and coastal Southern Waters (Fig. 5). It is also abundant in  
329 Tolo Harbour, an area known for its summer hypoxia and eutrophication (Hu et al.,  
330 2001; Sin & Chau, 1992). These results are consistent with previous studies indicating  
331 that *S. impressa* is dominant in low salinity, nutrient-rich and turbid estuaries (Irizuki  
332 et al., 2005; Tanaka et al., 2011), but we did not see a significant relation with  
333 turbidity (Tables 2 and 3). *Sinocytheridea impressa* is known as a euryhaline species  
334 widely distributed throughout the East and South China Seas [abundant in water  
335 depths of <20 m; Whatley and Zhao (1988a)], and the Indo-Pacific (Fig. 4).

336 *Neomonoceratina delicata* (= *Neomonoceratina crispata*; see Hou & Gou,  
337 2007) is very common in most of the samples, and the relative abundance  
338 significantly correlates with Zn (positive), salinity (positive) and turbidity (positive)  
339 (Tables 2 and 3). *Neomonoceratina delicata* is a nearshore species, abundant at depths  
340 less than 30 m, at relatively high salinities (>30; Zhao and Wang, 1988). It prefers the  
341 higher salinity waters in Hong Kong (Figs. 2 and 5; Tables 2 and 3) and in view of its  
342 positive correlation with Zn and turbidity, is likely tolerant to human-induced  
343 environmental stress such as pollution and eutrophication. This species is widely  
344 known from nearshore and estuarine environments in the East and South China Seas,  
345 and the Indo-Pacific (Fig. 4).

346 The relative abundance of *K. kloempritis* correlated only with water depth  
347 (positive) (Fig. 6; Tables 2 and 3). Widely known from the tropical Indo-Pacific  
348 region, *K. kloempritis* is abundant along the inner continental shelf of the South  
349 and East China Seas (Fig. 4), at water depths ranging from 20–50 m and salinity close  
350 to normal marine (Zhao & Wang, 1990). Our modelling results are consistent with  
351 this, showing a preference for the relatively deeper waters in our study (Tables 2 and

352 3). Thus, this species is probably useful for reconstructing past sea-level changes in  
353 the broad tropical and subtropical Indo-Pacific and northwestern Pacific regions as a  
354 deeper water indicator.

355 Relative abundance of *N. elongata* correlated only with turbidity (positive)  
356 (Tables 2 and 3). This species occurs along the entire coast of China (Fig. 4) in  
357 marginal marine, especially estuarine environments shallower than 20 m (Dong et al.,  
358 2012; Hou & Gou, 2007; Liu et al., 2013; Liu et al., 2017; Zhao & Whatley, 1993)  
359 (Fig. 4). Known from the Indo-Pacific region, our modeling results and previous  
360 studies indicate consistently that *N. elongata* prefers shallow, turbid waters like Deep  
361 Bay and the Pearl River Estuary (Figs 2 and 6).

362 The relative abundance of both *S. roesmani* and *H. reticulata* correlated with  
363 Pb (negative) (Tables 2 and 3), thus they are sensitive to metal pollution (but note the  
364 significant autocorrelation with the modeling result of *S. roesmani*) and absent in  
365 areas with high metal concentrations, e.g., Tolo and Victoria Harbours (Fig. 3, 6).  
366 Relative abundance of *H. reticulata* also correlated with water depth (negative)  
367 (Tables 2 and 3). This species is abundant in Tolo Harbour and the inner part of Mirs  
368 Bay (Fig. 6), at shallow depths, and is also consistently found in very shallow waters  
369 from the Indo-Pacific (Zhao & Whatley, 1989). Their metal-pollution sensitivity is  
370 contradictory because they occur in Tolo and Victoria Harbours, both polluted regions  
371 of Hong Kong, and further research is needed to better understand these results (Figs  
372 2 and 6). They occur in the East and South China Seas and the Indo-Pacific region  
373 (Fig. 4).

374

375 **d. Tropical Group**

376 Three species including *Loxoconcha malayensis*, *Alocopocythere goujoni* and  
377 *Hemikritha orientalis* are distributed from the South China Sea to the Indo-Pacific.

378 Relative abundance of *L. malayensis* correlated with dissolved oxygen  
379 (negative) and mud content (negative) (Tables 2 and 3). It is a typical tropical species  
380 known from the Indo-Pacific and the South China Sea (Fig. 4). We did not find a  
381 correlation with temperature, likely due to the small range of variation of bottom  
382 water temperatures in Hong Kong (winter temperature: 19.10–21.49°C). This species  
383 prefers coarse sediments and is resistant to low oxygen content (Table 2 and 3), as  
384 seen by its abundance in Victoria Harbour (Figs. 2 and 6).

385 Relative abundance of both *A. goujoni* and *H. orientalis* correlated with  
386 natural factors only. *Alocopocythere goujoni* correlated with salinity (positive)  
387 (Tables 2 and 3) and occurs not only in Mirs Bay where the salinity is higher, but also  
388 in Deep Bay and North Western Waters where the salinity is lower than in other areas  
389 (Figs 2 and 6). The Deep Bay and North Western Waters are shallow and have  
390 relatively low oxygen content. The modeling result of this species shows a marginally  
391 insignificant but negative relationship to oxygen content and water depth with  
392 moderately high relative importance (Table 3). We explain this inconsistency by  
393 considering their preference for higher salinity and shallow water depths, and also  
394 their resistance to low oxygen conditions, but further research is needed to know their  
395 autoecology with better confidence. Relative abundance of *H. orientalis* correlated  
396 with water depth (positive) (Tables 2 and 3; but note the significant autocorrelation  
397 with the modeling result of this genus), and it is more abundant in deeper waters  
398 including southern Mirs Bay (Fig. 6). It is known from depths of 20–50 m in the  
399 South China Sea (Zhao & Wang, 1988a), and reported from tropical Indo-Pacific  
400 marginal marine environments (Fig. 4). Our regression modeling consistently shows a



401 positive relationship between relative abundance and winter temperatures, with  
402 moderately high relative importance, although the correlation is marginally  
403 insignificant (Table 3).

404

405 **e. Globally Distributed Group**

406 *Propontocypris* is known as a cosmopolitan genus. The relative abundance of  
407 *Propontocypris* spp. significantly correlated with productivity (negative) (Tables 2  
408 and 3). This negative correlation with productivity (but note a significant  
409 autocorrelation with the modeling result of this genus) indicates that the genus prefers  
410 less eutrophic waters (Fig. 6). *Propontocypris* is a good swimmer (Maddocks, 1969),  
411 and thus may have an advantage in obtaining food in relatively food-limited  
412 environments.

413 Phytal genera including *Neonesidea* spp. and *Xestoleberis* spp. have global  
414 distribution and are correlated with various environmental factors. The relative  
415 abundance of *Neonesidea* spp. correlated with dissolved oxygen (positive), as  
416 expected for a phytal species (Smith & Kamiya, 2002; Yamada, 2007) (Table 2 and 3;  
417 Fig 7). Similarly, phytal (Irizuki et al., 2008; Sato & Kamiya, 2007; Yasuhara et al.,  
418 2002) *Xestoleberis* spp. correlated with dissolved oxygen (positive), turbidity  
419 (negative) and mud content (negative) (Table 2 and 3; Fig. 7). This taxon's habitat  
420 preference including clear water, coarse sediment, and high oxygen content are  
421 reflected in our modeling. As mentioned above, the value of allochthonous phytal  
422 species to environmental interpretation is limited, but they broadly reflect adjacent  
423 phytal environments.

424

425 **Summary**

426 Benthic ostracods from Hong Kong marginal marine waters studied here include  
427 widespread (i.e., one species distributed throughout the northwestern Pacific–Indo-  
428 Pacific region), temperate (i.e., five species distributed from the South China Sea to  
429 Japan and Russia), subtropical (i.e., six species distributed from the Indo-Pacific to  
430 the East China Sea), and tropical (i.e., three species distributed in the Indo-Pacific and  
431 South China Sea) species and three globally distributed genera (Fig. 4). We provide a  
432 robust baseline of autoecology for these common ostracod taxa based on rigorous  
433 statistical modeling using comprehensive environmental data. We established reliable  
434 indicator forms for water depth, mud content, salinity, turbidity, dissolved oxygen,  
435 heavy metal pollution (Pb and Zn) and eutrophication (chlorophyll-a) (Table 5). Thus  
436 our results are applicable for future ostracod-based paleoenvironmental studies in a  
437 wide range of localities from the tropics to the extratropics, and from the Indian  
438 Ocean to the northwestern Pacific. We established pollution and eutrophication  
439 indicator species in tropical environments for the first time. Anthropocene  
440 paleoenvironmental and paleoecological studies in the tropics are urgently needed  
441 because (1) the tropics are seriously under-studied (Wilkinson et al., 2014; Yasuhara  
442 et al., 2012a), (2) tropical environments and ecosystems are vulnerable and sensitive  
443 to human influences (Jackson et al., 2001; Pandolfi et al., 2003), and (3) Indo-Pacific  
444 tropical environments have been seriously degraded by the human activity of rapidly  
445 developing countries (Bellwood et al., 2004; Jackson, 2008; Knowlton & Jackson,  
446 2008). Our results provide useful and reliable tools for tropical Anthropocene  
447 research in the broad Indo-Pacific region.

448

449 **Acknowledgement**

450 We thank the Environmental Protection Department of Hong Kong, especially K.  
451 Yung, for support; L. Wong, C. Law, M. Lo, and the staff of the Electronic  
452 Microscope Unit of the University of Hong Kong for their technical support; B. Lin, S.  
453 Wang, R. Mak and V. Wang for helping sampling; P. Frenzel, M. Warne, E. Thomas  
454 and O. Friedrich for comments on an early version of the manuscript; S.W.A. Naqvi  
455 for editing; T. Irizuki, T. M. Cronin, and J. Rodríguez-Lázaro for reviewing our  
456 manuscript. The data used are listed in the tables and supplements. The work  
457 described in this paper was partially supported by the Environment and Conservation  
458 Fund of Hong Kong (project code: 19/2012), the General Research Fund of the  
459 Research Grants Council of Hong Kong (project code: HKU 17303115), the Early  
460 Career Scheme of the Research Grants Council of Hong Kong (project code: HKU  
461 709413P), and the Seed Funding Programme for Basic Research of the University of  
462 Hong Kong (project codes: 201111159140, 201611159053) (to MY).

463

464

465

466

467 **References:**

468 Abe, K.: Speciation completed? In *Keijella bisanensis* species group, in: Evolutionary  
469 biology of Ostracoda-its fundamentals and applications, edited by: Hanai, T.,  
470 Ikeya, N., and Ishizaki, K., Kodansha, Tokyo, Elsevier, Amsterdam, 11, 919–  
471 925, 1988.

- 472 Al Jumaily, W. A. K. and Al-Sheikhly, S. S.: Palaeozoogeography of shallow marine  
473 Ostracoda from Holocene sediments-southern Iraq, *Qatar Univ Sci J.*, 18,  
474 215–230, 1999.
- 475 Alberti, M., Hethke, M., Fürsich, F. T., and Liu, C.: Macro-versus microfauna:  
476 resolution potential of bivalves, gastropods, foraminifera and ostracods in  
477 reconstructing the Holocene palaeoenvironmental evolution of the Pearl River  
478 delta, China, *Palaeobio. Palaeoenv.*, 93(3), 327–353, 2013.
- 479 Anderson, D. R. and Burnham, K. P.: Avoiding pitfalls when using information-  
480 theoretic methods, *J. Wildlife Manage.*, 66, 912–918, 2002.
- 481 Anderson, D. R., Burnham, K. P., and Thompson, W. L.: Null hypothesis testing:  
482 problems, prevalence, and an alternative, *J. Wildlife Manage.*, 64, 912–923,  
483 2000.
- 484 Bartoń, K.: MuMIn: Multi-model inference, R package version 1.9.13., The  
485 Comprehensive R Archive Network (CRAN), available at [https://CRAN.R-](https://CRAN.R-project.org/package=MuMIn)  
486 [project.org/package=MuMIn](https://CRAN.R-project.org/package=MuMIn) (last access: 3 September 2018), 2013
- 487 Bellwood, D. R., Hughes, T. P., Folke, C., and Nyström, M.: Confronting the coral  
488 reef crisis, *Nature*, 429(6994), 827, 2004.
- 489 Bivand, R. and Piras, G.: Comparing implementations of estimation methods for  
490 spatial econometrics, *J. Stat. Softw.*, 63, 1–36, 2015.
- 491 Blackmore, G.: An overview of trace metal pollution in the coastal waters of Hong  
492 Kong, *Sci. Total Environ.*, 214(1), 21–48, 1998.

- 493 Boomer, I. and Eisenhauer, G.: Ostracod faunas as palaeoenvironmental indicators in  
494 marginal marine environments, in: *The Ostracoda: applications in Quaternary*  
495 *research*, edited by: Holmes, J. A. and Chivas, A. R., vol. 131, American  
496 Geophysical Union, Washington D.C., 135–149, 2002.
- 497 Burnham, K. P. and Anderson, D. R.: *Model Selection and Multi-model Inference: A*  
498 *Practical Information-theoretic Approach*, Springer, New York, 2002.
- 499 Cao, M.: Ostracods from Quaternary Hang Hau Formation, Lei Yue Mun, Hong  
500 Kong, in: *Fossils and Strata of Hong Kong (Lower Volume)*, edited by: Li, Z.,  
501 Chen, J., and He, G., Science Press, Beijing, 171–183, 1998 (in Chinese).
- 502 Cronin, T. M.: Ostracods and sea level, in: *Handbook of Sea-Level Research*, edited  
503 by: Shennan, I., Long, A. J., and Horton, B. P, John Wiley & Sons, Ltd, 249–  
504 257, 2015.
- 505 Cronin, T. M. and Vann, C. D.: The sedimentary record of climatic and anthropogenic  
506 influence on the Patuxent estuary and Chesapeake Bay ecosystems, *Estuaries*,  
507 26(2), 196–209, 2003.
- 508 Dewi, K. T.: Ostracoda from the Java Sea, west of Bawean Island, Indonesia, *Mar.*  
509 *Geol. Inst. Spec. Pub.*, 4, 1–115, 1997.
- 510 Dong, Y., Liu, C., Chen, M., Qu, R., Wu, T., and Zhao, F.: Late Quaternary  
511 paleontology and environmental changes in Da'Ao plain middle Pearl River  
512 Delta, *Quatern. Sci.*, 32(6), 1183–1198, 2012 (in Chinese with English  
513 Abstract).

514 Environmental Protection Department, H. K.: Marine Water Quality in Hong Kong  
515 2011, available at [http://wqrc.epd.gov.hk/pdf/water-quality/annual-](http://wqrc.epd.gov.hk/pdf/water-quality/annual-report/Marine2011EN.pdf)  
516 [report/Marine2011EN.pdf](http://wqrc.epd.gov.hk/pdf/water-quality/annual-report/Marine2011EN.pdf) (last access: 3 September 2018), 2011.

517 Fauzielly, L., Irizuki, T., and Sampei, Y.: Vertical changes of recent ostracode  
518 assemblages and environment in the inner part of Jakarta Bay, Indonesia, *J. of*  
519 *Coastal Development*, 16(1), 11–24, 2013.

520 Frenzel, P. and Boomer, I.: The use of ostracods from marginal marine, brackish  
521 waters as bioindicators of modern and Quaternary environmental change,  
522 *Palaeogeogr. Palaeoclimatol. Palaecol.*, 225(1), 68–92, 2005.

523 Gu, Y., Liu, H., and Qin, Y.: Postglacial transgression maximum documented by the  
524 core sediments of Xixi Wetland, East China, *Quatern. Int.*, 436, 84–95, 2017.

525 Hazel, J. E.: Determining late Neogene and Quaternary palaeoclimates and  
526 palaeotemperature regimes using ostracods, in: *Ostracoda in the Earth*  
527 *Sciences*, edited by: De Deckker, P., Colin, J. P. and Peypouquet, J. P.,  
528 Elsevier, Amsterdam, 89–103, 1988.

529 Hendrickx, J., Pelzer, B., Te Grotenhuis, M., and Lammers, J.: Collinearity involving  
530 ordered and unordered categorical variable, RC33 conference, Amsterdam,  
531 The Netherlands, 17–20 August 2004, 2004.

532 Hodgkiss, I. and Yim, W.: A case study of Tolo Harbour, Hong Kong, *Eutrophic*  
533 *Shallow Estuaries and Lagoons*, 4, 41–57, 1995.

534 Hoffman, J. I. E.: *Biostatistics for Medical and Biomedical Practitioners*, Academic  
535 Press, Tiburon, California, USA, 2015.

- 536 Hong, Y., Yasuhara, M., Iwatani, H., Seto, K., Yokoyama, Y., Yoshioka, K., and  
537 Mamo, B.: Freshwater reservoir construction by damming a marine inlet in  
538 Hong Kong: Paleoecological evidence of local community change, *Mar.*  
539 *Micropaleontol.*, 132, 53–59, 2017.
- 540 Horne, D., Holmes, J., Viehberg, F., and Rodriguez-Lazaro, J.: Ostracoda as proxies  
541 for Quaternary climate change, in: *Developments in Quaternary Science*,  
542 edited by: Jaap J. M. and van der Meer, vol. 17, Elsevier, Amsterdam, 1–337,  
543 2012.
- 544 Hou, Y. T. and Gou, Y. X.: *Ostracod Fossils of China, Vol. II, Cytheracea and*  
545 *Cytherellidae*, Science Press, Beijing, 2007 (in Chinese).
- 546 Hu, J., Zhang, G., Li, K., Peng, P., and Chivas, A. R.: Increased eutrophication  
547 offshore Hong Kong, China during the past 75 years: evidence from high-  
548 resolution sedimentary records, *Mar. Chem.*, 110(1), 7–17, 2008.
- 549 Hu, W. F., Lo, W., Chua, H., Sin, S. N., and Yu, P. H. F.: Nutrient release and  
550 sediment oxygen demand in a eutrophic land-locked embayment in Hong  
551 Kong, *Environ. Int.*, 26(5), 369–375, 2001.
- 552 Hussain, S. M. and Mohan, S. P.: Recent Ostracoda from Adyar River Estuary,  
553 Chennai, Tamil Nadu, *J. Palaeontol. Soc. Ind.*, 45(2), 25–32, 2000.
- 554 Hussain, S. M. and Mohan, S. P.: Distribution of recent benthic Ostracoda in Adyar  
555 river estuary, east coast of India, *Indian J. Mar. Sci.*, 30, 53–56, 2001.

- 556 Hussain, S. M., Mohan, S. P., and Jonathan, M. P.: Ostracoda as an aid in identifying  
557 2004 tsunami sediments: a report from SE coast of India, *Nat. Hazards.*, 55(2),  
558 513–522, 2010.
- 559 Hussain, S. M., Ravi, G., Mohan, S. P., and Rao, N. R.: Recent benthic Ostracoda  
560 from the inner shelf off Chennai, south east coast of India-implication of  
561 microenvironments, *Env. Micropal. Microbiol. Microbenth.*, 1, 105–121,  
562 2004.
- 563 Ikeya, N. and Shiozaki, M.: Characteristics of the inner bay ostracodes around the  
564 Japanese islands: The use of ostracodes to reconstruct paleoenvironments,  
565 *Mem. Geol. Soc. Japan*, 39, 15–32, 1993 (in Japanese with English abstract).
- 566 Ikeya N, Tanaka G, Tsukagoshi A,: Ostracoda, in: *The Database of Japanese Fossil*  
567 *Type Specimens Described During The 20th Century (Part 3)*, edited by Ikeya,  
568 N., Hirano, H., and Ogasawara, K., *Palaeontological Society of Japan.*, Japan,  
569 37–131, 2003.
- 570 Irizuki, T., Nakamura, Y., Takayasu, K., and Sakai, S.: Faunal changes of Ostracoda  
571 (Crustacea) in Lake Nakaumi, southwestern Japan, during the last 40 years,  
572 *Geosci. Rep. Shimane Univ.*, 22, 149–160, 2003 (in Japanese with English  
573 abstract).
- 574 Irizuki, T., Matsubara, T., and Matsumoto, H.: Middle Pleistocene Ostracoda from the  
575 Takatsukayama Member of the Meimi Formation, Hyogo Prefecture, western  
576 Japan- significance of the occurrence of *Sinocytheridea impressa*, *Paleontol.*  
577 *Res.*, 9(1), 37–54, 2005.



578 Irizuki, T., Takata, H., and Ishida, K.: Recent Ostracoda from Urauchi Bay,  
579 Kamikoshiki-jima Island, Kagoshima Prefecture, southwestern Japan, *Laguna*,  
580 13, 13–28, 2006.

581 Irizuki, T., Seto, K., and Nomura, R.: The impact of fish farming and bank  
582 construction on Ostracoda in Uranouchi Bay on the Pacific coast of southwest  
583 Japan-Faunal changes between 1954 and 2002/2005, *Paleonto. Res.*, 12(3),  
584 283–302, 2008.

585 Irizuki, T., Taru, H., Taguchi, K., and Matsushima, Y.: Paleobiogeographical  
586 implications of inner bay Ostracoda during the Late Pleistocene  
587 Shimosueyoshi transgression, central Japan, with significance of its migration  
588 and disappearance in eastern Asia, *Palaeogeogr. Palaeoclimatol. Palaeocol.*,  
589 271(3), 316–328, 2009.

590 Irizuki, T., Takimoto, A., Sako, M., Nomura, R., Kakuno, K., Wanishi, A., and  
591 Kawano, S.: The influences of various anthropogenic sources of deterioration  
592 on meiobenthos (Ostracoda) over the last 100 years in Suo-Nada in the Seto  
593 Inland Sea, southwest Japan, *Mar. Pollut. Bull.*, 62(10), 2030–2041, 2011.

594 Irizuki, T., Ito, H., Sako, M., Yoshioka, K., Kawano, S., Nomura, R., and Tanaka, Y.:  
595 Anthropogenic impacts on meiobenthic Ostracoda (Crustacea) in the  
596 moderately polluted Kasado Bay, Seto Inland Sea, Japan, over the past 70  
597 years, *Mar. Pollut. Bull.*, 91(1), 149–159, 2015a.

598 Irizuki, T., Kobe, M., Ohkushi, K., Kawahata, H., and Kimoto, K.: Centennial-to  
599 millennial-scale change of Holocene shallow marine environments recorded in  
600 ostracode fauna, northeast Japan, *Quatern. Res.*, 84(3), 467–480, 2015b.

601 Irizuki, T., Hirose, K., Ueda, Y., Fujihara, Y., Ishiga, H., & Seto, K.: Ecological shifts  
602 due to anthropogenic activities in the coastal seas of the Seto Inland Sea,  
603 Japan, since the 20th century, *Mar. Pollut. Bull.*, 127, 637–653, 2018.

604 Ishizaki, K.: Ostracodes from Uranouchi Bay, Kochi Prefecture, Japan, *Sci. Tohoku*  
605 *Univ., Sendai, (2nd Ser Geol.)*, 40, 1–45, 1968.

606 Ishizaki, K.: Ostracoda from the East China Sea, *Sci. Tohoku Univ., (2nd Ser Geol.)*,  
607 51(1/2), 37-A39, 1981.

608 Iwasaki Y.: Ostracod assemblages from the Holocene deposits of Kumamoto,  
609 Kyushu, *Kumamoto Jour. Sci.(Geol.)*, 12, 1–12, 1992 (in Japanese with  
610 English abstract).

611 Iwatani, H., Young, S. M., Irizuki, T., Sampei, Y., and Ishiga, H.: Spatial variations in  
612 recent ostracode assemblages and bottom environments in Trincomalee Bay,  
613 northeast coast of Sri Lanka, *Micropaleontology*, 509–518, 2014.

614 Jackson, J. B. C.: Ecological extinction and evolution in the brave new ocean, *PNAS*,  
615 106, 19685–19692, 2008.

616 Jackson, J. B. C., Kirby, M. X., Berger, W. H., Bjorndal, K. A., Botsford, L. W.,  
617 Bourque, B. J., Bradbury, R. H., Cooke, R., Erlandson, J., and Estes, J. A.:  
618 Historical overfishing and the recent collapse of coastal ecosystems, *Science*,  
619 293(5530), 629–637, 2001.

620 Knowlton, N. and Jackson, J. B. C.: Shifting baselines, local impacts, and global  
621 change on coral reefs, *PLoS Biol.*, 6(2), e54, 2008.

- 622 Legendre, P. and Legendre, L.: Numerical Ecology: second English edition (Vol. 20),  
623 Elsevier, Amsterdam, The Netherlands, 1998.
- 624 Li, S.: Distribution of the ostracod thanatocoenses in the Pearl River Mouth area, J.  
625 Tropic. Oceanogra., 4, 43–54, 1985.
- 626 Liu, C., Franz T., F., Wu, J., Dong, Y., Yang, T., Yin, J., Wang, Y., and Liu, M.: Late  
627 Quaternary palaeoenvironmental changes documented by microfaunas and  
628 shell stable isotopes in the southern Pearl River Delta plain, South China, J.  
629 Palaeogeogra., 2(4), 344–361, 2013.
- 630 Liu, J., Liu, C., Jia, L., Yang T., Zhang, S. and Yin, J.: Foraminiferal and ostracod  
631 distribution in surface sediments from Huangmao Bay of Pearl River Estuary  
632 and its influencing factors, J. Palaeogeogr, 15(3), 413–422, 2013 (in Chinese  
633 with English abstract).
- 634 Liu, J., Zhang, X., Mei, X., Zhao, Q., Guo, X., Zhao, W., Liu, J., Saito, Y., Wu, Z.,  
635 and Li, J.: The sedimentary succession of the last~ 3.50 Myr in the western  
636 south Yellow Sea: Paleoenvironmental and tectonic implications, Mar. Geol.,  
637 399, 47–65, 2017.
- 638 Maddocks, R. F.: Recent ostracodes of the Family Pontocyprididae chiefly from the  
639 Indian Ocean, Smithson. Contrib. Zool., 7, 1–56, 1969.
- 640 Morton, B.: The subsidiary impacts of dredging (and trawling) on a subtidal benthic  
641 molluscan community in the southern waters of Hong Kong, Mar. Pollut.  
642 Bull., 32(10), 701–710, 1996.

- 643 Morton, B. and Wu, S.: The hydrology of the coastal waters of Hong Kong, Environ.  
644 Res., 10(3), 319–347, 1975.
- 645 Morton, B. and Blackmore, G.: South China Sea, Mar. Pollut. Bull., 42(12), 1236–  
646 1263, 2001.
- 647 Mostafawi, N.: Recent ostracods from the central Sunda Shelf, between the Malay  
648 Peninsula and Borneo, Senck. Leth., 72, 129–168, 1992.
- 649 Nishath, N. M., Hussain, S. M., Neelavnnan, K., Thejasino, S., Saalim, S., and  
650 Rajkumar, A.: Ostracod biodiversity from shelf to slope oceanic conditions,  
651 off central Bay of Bengal, India, Palaeogeogr. Palaeoclimatol. Palaecol., 483,  
652 70–82, 2017.
- 653 Noraswana, N. F., Ramlan, O., and Norashikin, S.: Distribution of recent Ostracoda in  
654 offshore sediment of selected stations in the Sulu Sea, Sabah, Malaysian App.  
655 Biol., 43(2), 49–57, 2014.
- 656 Owen, R. B. and Sandhu, N.: Heavy metal accumulation and anthropogenic impacts  
657 on Tolo Harbour, Hong Kong, Mar. Pollut. Bull., 40(2), 174–180, 2000.
- 658 Ozawa, H., Kamiya, T., Itoh, H., and Tsukawaki, S.: Water temperature, salinity  
659 ranges and ecological significance of the three families of Recent cold-water  
660 ostracods in and around the Japan Sea, Paleontol. Res., 8(1), 11–28, 2004.
- 661 Pandolfi, J. M., Bradbury, R. H., Sala, E., Hughes, T. P., Bjorndal, K. A., Cooke, R.  
662 G., McArdle, D., McClenachan, L., Newman, M. J. H., and Paredes, G.:  
663 Global trajectories of the long-term decline of coral reef ecosystems, Science,  
664 301(5635), 955–958, 2003.

- 665 Pugliese, N., Maria Eugenia, M., Francesco, S., and Chaimanee, N.: Environmental  
666 monitoring through the shallow marine ostracods of Phetchaburi area (NW  
667 Gulf of Thailand), in: Proceedings of the Second and Third Italian Meetings  
668 on Environmental Micropaleontology, Urbino, Italy, 10–12 June 2003 and 8–9  
669 June 2004, vol. 11, 85–90, 2006.
- 670 R Core Team.: R: A language and environment for statistical computing [Computer  
671 software 3.2.4], available at <http://www.R-project.org/> (last access: 3  
672 September 2018), 2016.
- 673 Ruiz, F., Abad, M., Bodergat, A. M., Carbonel, P., Rodríguez-Lázaro, J., and  
674 Yasuhara, M.: Marine and brackish-water ostracods as sentinels of  
675 anthropogenic impacts, *Earth-Sci. Rev.*, 72, 89–111, 2005.
- 676 Sato, T. and Kamiya, T.: Taxonomy and geographical distribution of recent  
677 *Xestoleberis* species (Cytheroidea, Ostracoda, Crustacea) from Japan,  
678 *Paleontol. Res.*, 11(2), 183–227, 2007.
- 679 Schornikov, E. I., Zenina, M. A., and Ivanova, E. V.: Ostracods as indicators of the  
680 aquatic environmental conditions on the northeastern Black Sea shelf over the  
681 past 70 years, *Russ. J. Mar. Biol.*, 40(6), 455–464, 2014.
- 682 Shin, P. K. S.: Changes in benthic infaunal communities in Tolo Harbour: will the  
683 trend continue, *Perspectives on Marine Environment Change in Hong Kong  
684 and Southern China*, 2001, 579–592, 1977.
- 685 Sin, Y. S. and Chau, K. W.: Eutrophication studies on Tolo Harbour, Hong Kong,  
686 *Water Sci. Technol.*, 26(9–11), 2551–2554, 1992.

- 687 Smith, R. J. and Kamiya, T.: The ontogeny of *Neonesidea oligodentata* (Bairdioidea,  
688 Ostracoda, Crustacea), *Hydrobiologia*, 489(1-3), 245–275, 2002.
- 689 Stepanova, A., Taldenkova, E., and Bauch, H. A.: Recent Ostracoda from the Laptev  
690 Sea (Arctic Siberia): species assemblages and some environmental  
691 relationships, *Mar. Micropaleontol.*, 48(1), 23–48, 2003.
- 692 Tanaka, G., Komatsu, T., and Phong, N. D.: Recent ostracod assemblages from the  
693 northeastern coast of Vietnam and the biogeographical significance of the  
694 euryhaline species, *Micropaleontology*, 55, 365–382, 2009.
- 695 Tanaka, G., Komatsu, T., Saito, Y., Nguyen, D. P., and Vu, Q. L.: Temporal changes  
696 in ostracod assemblages during the past 10,000 years associated with the  
697 evolution of the Red River delta system, northeastern Vietnam, *Mar.*  
698 *Micropaleontol.*, 81(3), 77–87, 2011.
- 699 Tanaka, G., Henmi, Y., Masuda, T., Moriwaki, H., Komatsu, T., Zhou, B., Maekawa,  
700 T., Niiyama, S., Nguyen, P. D., and Doan, H. D.: Recent ostracod distribution  
701 in western Kyushu, Japan, related to the migration of Chinese continental  
702 faunal elements, *Mar. Micropaleontol.*, 146, 1–38, 2019.
- 703 Tanner, P. A., Leong, L. S., and Pan, S. M.: Contamination of heavy metals in marine  
704 sediment cores from Victoria Harbour, Hong Kong, *Mar. Pollut. Bull.*, 40(9),  
705 769–779, 2000.
- 706 Wang, P. and Zhao, Q.: Ostracod distribution in bottom sediments of the East China  
707 Sea, in: *Marine Micropaleontology of China*, edited by: Wang, et al., China  
708 Ocean Press, Beijing, 70–92, 1985 (in Chinese),.

- 709 Wang, P., Zhang, J., Zhao, Q., Min, Q., Bian, Y., Zheng, L., Cheng, X., and Chen, R.:  
710 Foraminifera and Ostracoda in Bottom Sediments of the East China Sea,  
711 Ocean Press, Beijing, 1988 (in Chinese with English abstract).
- 712 Wang, Q. and Zhang, L.: Holocene ostracod fauna and paleoenvironment in the sea  
713 region around Hong Kong, *Acta Oceanol. Sin.*, 6, 281–291, 1987.
- 714 Whatley, R. and Zhao, Q.: A revision of Brady's 1869 study of the Ostracoda of Hong  
715 Kong, *J. Micropalaeontol.*, 7(1), 21–29, 1988a.
- 716 Whatley, R. and Zhao, Q.: Recent Ostracoda of the Malacca Straits, Part II, *Rev.*  
717 *Española Micropaleontol.* 20, 5–37, 1988b.
- 718 Wilkinson, I. P., Poirier, C., Head, M. J., Sayer, C. D., and Tibby, J.: Microbiotic  
719 signatures of the Anthropocene in marginal marine and freshwater  
720 palaeoenvironments, Geological Society, London, Special Publications,  
721 395(1), 185–219, 2014.
- 722 Woodroffe, C. D., Nicholls, R. J., Saito, Y., Chen, Z., and Goodbred, S. L.:  
723 Landscape variability and the response of Asian megadeltas to environmental  
724 change, in: *Global Change and Integrated Coastal Management: the Asia-*  
725 *Pacific Region*, edited by: Harvey, N., vol. 10, 277–314, Springer, Berlin,  
726 2006.
- 727 Yamada, S.: Ultrastructure of the carapace margin in the Ostracoda (Arthropoda:  
728 Crustacea), *Hydrobiologia*, 585(1), 201–211, 2007.

- 729 Yang, H., Chen, T., Hou, Y., Ho, J., Zhou, Q., and Tian, M.: Cretaceous–Quaternary  
730 Ostracoda Fauna from Jiangsu, Geological Publishing House, Peking, 386,  
731 1982.
- 732 Yasuhara, M. and Irizuki, T.: Recent Ostracoda from the northeastern part of Osaka  
733 Bay, southwestern Japan, *J. Geosci. Osaka City Univ.*, 44, 57–95, 2001.
- 734 Yasuhara, M. and Seto, K.: Holocene relative sea-level change in Hiroshima Bay,  
735 Japan: A semi-quantitative reconstruction based on ostracodes, *Paleontol.*  
736 *Res.*, 10(2), 99–116, 2006.
- 737 Yasuhara, M. and Yamazaki, H.: The impact of 150 years of anthropogenic pollution  
738 on the shallow marine ostracode fauna, Osaka Bay, Japan, *Mar.*  
739 *Micropaleontol.*, 55(1), 63–74, 2005.
- 740 Yasuhara, M., Irizuki, T., Yoshikawa, S., and Nanayama, F.: Changes in Holocene  
741 ostracode faunas and depositional environments in the Kitan Strait,  
742 southwestern Japan, *Paleontol. Res.*, 6(1), 85–99, 2002.
- 743 Yasuhara, M., Yamazaki, H., Irizuki, T., and Yoshikawa, S.: Temporal changes of  
744 ostracode assemblages and anthropogenic pollution during the last 100 years,  
745 in sediment cores from Hiroshima Bay, Japan, *The Holocene*, 13(4), 527–536,  
746 2003.
- 747 Yasuhara, M., Yoshikawa, S., and Nanayama, F.: Reconstruction of the Holocene  
748 seismic history of a seabed fault using relative sea-level curves reconstructed  
749 by ostracode assemblages: Case study on the Median Tectonic Line in Iyo-  
750 nada Bay, western Japan, *Palaeogeogr. Palaeoclimatol. Palaecol.*, 222(3–4),  
751 285–312, 2005.



- 752 Yasuhara, M., Yamazaki, H., Tsujimoto, A., and Hirose, K.: The effect of long-term  
753 spatiotemporal variations in urbanization-induced eutrophication on a benthic  
754 ecosystem, Osaka Bay, Japan, *Limnol. Oceanogr.*, 52(4), 1633–1644, 2007.
- 755 Yasuhara, M., Hunt, G., Cronin, T. M., & Okahashi, H.: Temporal latitudinal-gradient  
756 dynamics and tropical instability of deep-sea species diversity, *PNAS*,  
757 106(51), 21717–21720, 2009.
- 758 Yasuhara, M., Hunt, G., Breitburg, D., Tsujimoto, A., and Katsuki, K.: Human-  
759 induced marine ecological degradation: micropaleontological perspectives,  
760 *Ecol. Evol.*, 2(12), 3242–3268, 2012a.
- 761 Yasuhara, M., Hunt, G., van Dijken, G., Arrigo, K. R., Cronin, T. M., and  
762 Wollenburg, J. E.: Patterns and controlling factors of species diversity in the  
763 Arctic Ocean, *J. Biogeogr.*, 39(11), 2081–2088, 2012b.
- 764 Yasuhara, M., Iwatani, H., Hunt, G., Okahashi, H., Kase, T., Hayashi, H., Irizuki, T.,  
765 Aguilar, Y. M., Fernando, A. G. S., and Renema, W.: Cenozoic dynamics of  
766 shallow-marine biodiversity in the Western Pacific, *J. Biogeogr.*, 44(3), 567–  
767 578, 2017.
- 768 Zhao, Q.: Recent Ostracoda from the coast zone of the East China Sea and the Yellow  
769 Sea, *Mar. Geol. & Quatern. Geo.*, 4, 45–57, 1984 (in Chinese).
- 770 Zhao, Q. and Wang, P.: Distribution of modern Ostracoda in the shelf seas off China,  
771 in: *Developments in Palaeontology and Stratigraphy*, edited by: Hanai, T.,  
772 Ikeya, N., and Ishizaki, K., Kodansha, Tokyo, Elsevier, Amsterdam, vol. 11,  
773 805–821, 1988a (in Chinese with English abstract).

- 774 Zhao, Q. and Wang, P.: Modern Ostracoda in sediments of shelf seas off China:  
775 quantitative and qualitative distributions, *Oceanol. Limnol. Sin.*, 19, 553–561,  
776 1988b (in Chinese with English abstract).
- 777 Zhao, Q. and Wang, P.: Modern Ostracoda in shelf seas off China: Zoogeographical  
778 zonation, *Oceanol. Limnol. Sin.*, 21, 458–464, 1990 (in Chinese with English  
779 abstract).
- 780 Zhao, Q. and Whatley, R.: Recent podocopid Ostracoda of the Sedili River and Jason  
781 Bay, southeastern Malay Peninsula, *Micropaleontology*, 35, 168–187, 1989.
- 782 Zhao, Q. and Whatley, R.: New species of the ostracod genus *Neosinocythere* Huang  
783 (1985) from the Indo-West Pacific Region, *J. Micropalaeontol.*, 12(1), 1–7,  
784 doi: 10.1144/jm.12.1.1, 1993.
- 785 Zhao, Q., Wang, P., and Zhang, Q.: Ostracoda distribution in northern South China  
786 Sea continental Shelf, *Acta Oceanol. Sin. (Chinese Version)*, 8, 590–602,  
787 1986 (in Chinese).
- 788 Zhou, Y., Xie, Y., Chen, F., Long, G., and Chen, C.: Microfaunas in hole Zk201-2 at  
789 Zhujiang River Delta since Late Pleistocene and their implications for  
790 paleoenvironments, *Mar. Geol. & Quatern. Geol.*, 35(4), 114–123, 2015 (in  
791 Chinese with English abstract).
- 792
- 793
- 794 **Captions**
- 795

796 Fig. 1 Locality map showing the 52 sampling sites across Hong Kong, including 41  
797 open water sites (blue dots) and 11 typhoon shelter sites (red open dots). From west to  
798 east, DS: Deep Bay; NS: North Western waters; SS: Southern waters; VS: Victoria  
799 Harbour; ES: Eastern Buffer; JS: Junk Bay; TS: Tolo Harbour; PS: Port Shelter; MS:  
800 Mirs Bay.

801

802 Fig. 2 Spatial distribution of environmental parameters in Hong Kong. Mean surface-  
803 water chlorophyll-a concentration; water depth; summer (June to September) bottom-  
804 water dissolved oxygen content; mean bottom-water salinity; mean turbidity; mean  
805 summer (June to September) bottom-water temperature; mean winter (November to  
806 February) bottom-water temperature; and mean mud content. All are averaged values  
807 of the data obtained during 1986–2013 (Table 1).

808

809 Fig. 3 Spatial distribution of environmental parameters in Hong Kong. Mean copper  
810 (Cu) concentration, mean lead (Pb) concentration, and mean zinc (Zn) concentration  
811 in surface sediments. All are averaged values of the data obtained during 1986–2013  
812 (Table 1).

813

814 Fig. 4 Geographical distributions of the 18 taxa in the northwestern Pacific and Indo-  
815 Pacific regions, including *Pistocythereis bradyi*, *Bicornucythere bisanensis* s.l.,  
816 *Nipponocythere bicarinata*, *Spinileberis quadriaculeata*, *Phlyctocythere japonica*,  
817 *Loxoconcha epeterseni*, *Sinocytheridea impressa*, *Neomonoceratina delicata*, *Keijella*  
818 *kloempritensis*, *Neosinocythere elongata*, *Stigmatocythere roesmani*, *Hemicytheridea*  
819 *reticulata* *Loxoconcha malayensis*, *Alocopocythere goujoni*, *Hemikrithe orientalis*,  
820 *Propontocypris* spp., *Neonesidea* spp. and *Xestoleberis* spp.. The following references

821 were used mainly to determine the geographical distributions of the species: Al  
822 Jumaily and Al-Sheikhly (1999); Dewi (1997); Dong et al. (2012); Fauzielly et al.  
823 (2013); Gu et al. (2017); Hong et al. (2017); Hou and Gou (2007); Hussain et al.  
824 (2004); Hussain et al. (2010); Hussain and Mohan (2000, 2001); Irizuki et al. (2006);  
825 Irizuki et al. (2009); Iwatani et al. (2014); Jie et al. (2013); Li (1985); Mostafawi  
826 (1992); Nishath et al. (2017); Noraswana et al. (2014); Pugliese et al. (2006);  
827 Schornikov et al. (2014); Tanaka et al. (2009); Tanaka et al. (2011); Wang et al.  
828 (1988); Wang and Zhang (1987); Wang and Zhao (1985); Zhao (1984); Zhao and  
829 Wang (1988a, 1988b, 1990); Zhao and Whatley (1993); Zhou et al. (2015). Note that  
830 *Sinocytheridea impressa* is know to be distributed in Japan, but their Japanese  
831 distribution is very limited in certain areas of the southern part of Japan (Iwasaki,  
832 1992; Tanaka et al. 2019). Thus, we did not indicate their Japanese-Russian coast  
833 distribution in this figure.

834

835 Fig. 5 Spatial distribution of the relative abundance for *Pistocythereis bradyi*,  
836 *Bicornucythere bisanensis* s.l., *Nipponocythere bicarinata*, *Spinileberis*  
837 *quadriaculeata*, *Phlyctocythere japonica*, *Loxoconcha epeterseni*, *Sinocytheridea*  
838 *impressa*, and *Neomonoceratina delicata* in Hong Kong. See Figure 1 for sampling  
839 stations.

840

841 Fig. 6 Spatial distribution of the relative abundance for *Keijella kloempritensis*,  
842 *Neosinocythere elongata*, *Stigmatocythere roesmani*, *Hemicytheridea reticulata*  
843 *Loxoconcha malayensis*, *Alocopocythere goujoni*, *Hemikrithe orientalis*, and  
844 *Propontocypris* spp. in Hong Kong. See Figure 1 for sampling stations.

845

846 Fig. 7. Spatial distribution of the relative abundance for *Neonesidea* spp. and  
847 *Xestoleberis* spp. in Hong Kong. See Figure 1 for sampling stations.

848

849

850 Table 1. Summary of marine water/sediment parameters. Note: 1. Summer: June,  
851 July, August and September. 2. Winter: November, December, January and February.

852

853 Table 2. Best three regression models of the relative abundance of common species,  
854 including *Pistocythereis bradyi*, *Bicornucythere bisanensis* s.l., *Nipponocythere*  
855 *bicarinata*, *Spinileberis quadriaculeata*, *Phlyctocythere japonica*, *Loxoconcha*  
856 *epeterseni*, *Sinocytheridea impressa*, *Neomonoceratina delicata*, *Keijella*  
857 *kloempritisensis*, *Neosinocythere elongata*, *Stigmatocythere roesmani*, *Hemicytheridea*  
858 *reticulata* *Loxoconcha malayensis*, *Alocopocythere goujoni*, *Hemikrithe orientalis*,  
859 *Propontocypris* spp., *Neonesidea* spp. and *Xestoleberis* spp.. The table shows the  
860 coefficient of each term, adjusted  $R^2$ , the Akaike information criterion corrected for  
861 small sample size (AICc), and the Akaike weight (AW). Bold denotes significance at  
862  $P < 0.05$ . Overall  $P$  is  $< 0.05$  in all models. R: region. Other abbreviations are found in  
863 Table 1.

864

865 Table 3. Model-averaged parameter estimates and CIs of the relative abundance for  
866 common species including *Pistocythereis bradyi*, *Bicornucythere bisanensis* s.l.,  
867 *Nipponocythere bicarinata*, *Spinileberis quadriaculeata*, *Phlyctocythere japonica*,  
868 *Loxoconcha epeterseni*, *Sinocytheridea impressa*, *Neomonoceratina delicata*, *Keijella*  
869 *kloempritisensis*, *Neosinocythere elongata*, *Stigmatocythere roesmani*, *Hemicytheridea*  
870 *reticulata* *Loxoconcha malayensis*, *Alocopocythere goujoni*, *Hemikrithe orientalis*,

871 *Propontocypris* spp., *Neonesidea* spp. and *Xestoleberis* spp.. CIs, confidence  
872 intervals; RI, relative importance (the sum of the Akaike weights of models that  
873 include the variable in question; see Materials and Methods); R, region. Other  
874 abbreviations are found in Table 1. Bold denotes CIs that exclude zero. For R,  
875 coefficient, lower CI, and upper CI values shown are averages of those for geographic  
876 regions.

877

878 Table 4. GVIF value for Environmental Variables. Df, degree of freedom; R, region.  
879 Other abbreviations are found in Table 1.

880

881 Table 5. Summary of autoecology for common ostracod taxa. Chl: Chlorophyll-a; D:  
882 Water Depth; DO: Dissolved Oxygen; MD: Mud Content; Sal: Salinity; Tur:  
883 Turbidity; WT: Winter Temperature; Pb: Lead; Zn: Zinc; R: Region. + and - marks  
884 indicate significant positive and negative correlations, respectively.

885

886

887 Supplement A. Ostracod faunal list.

888

889 Supplement B. Dataset used for the regression modeling.

890

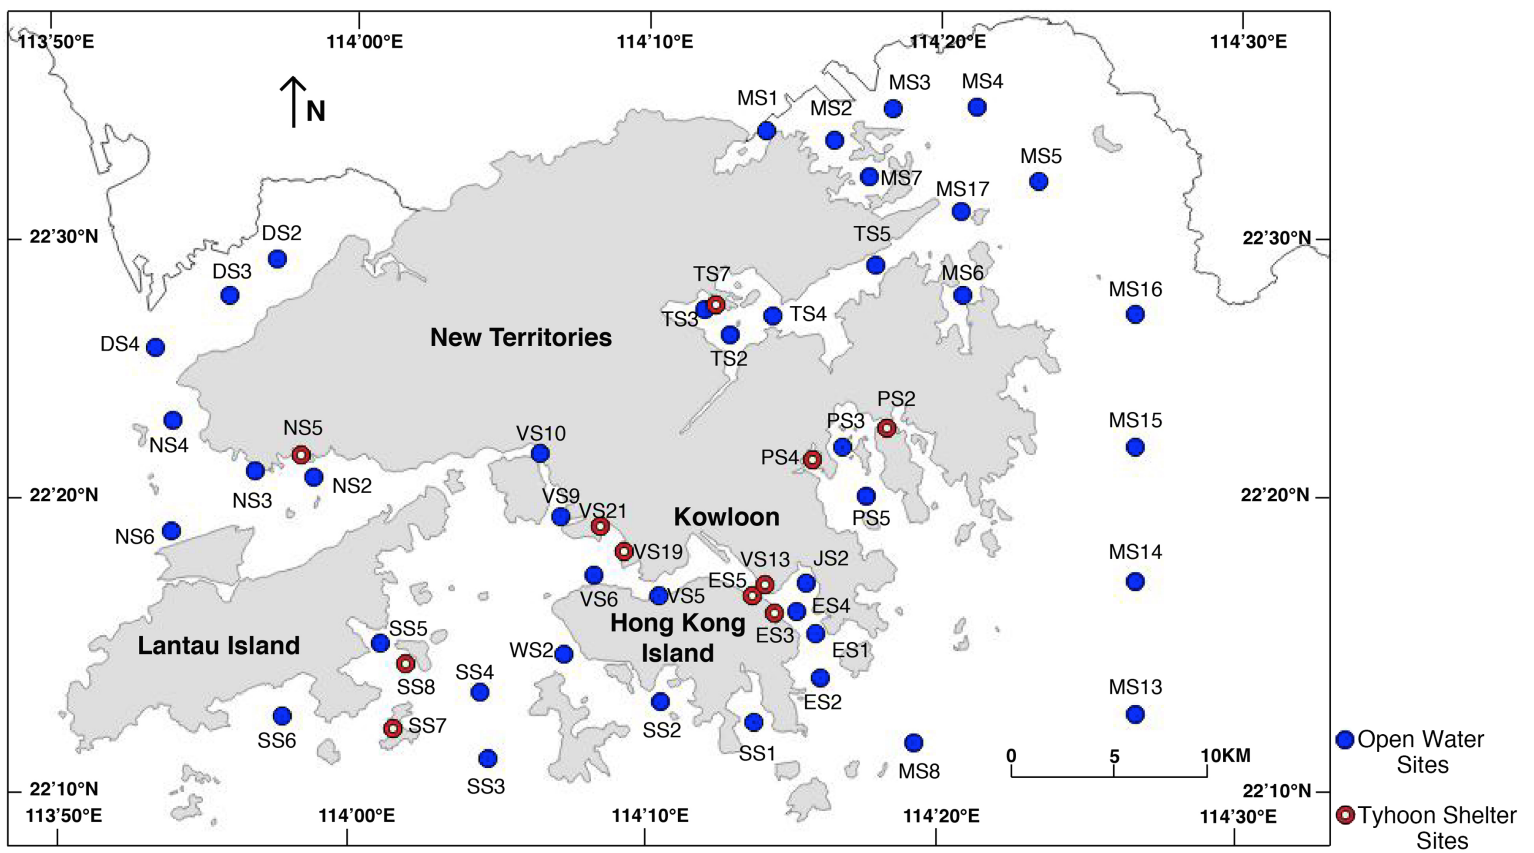

Fig. 1

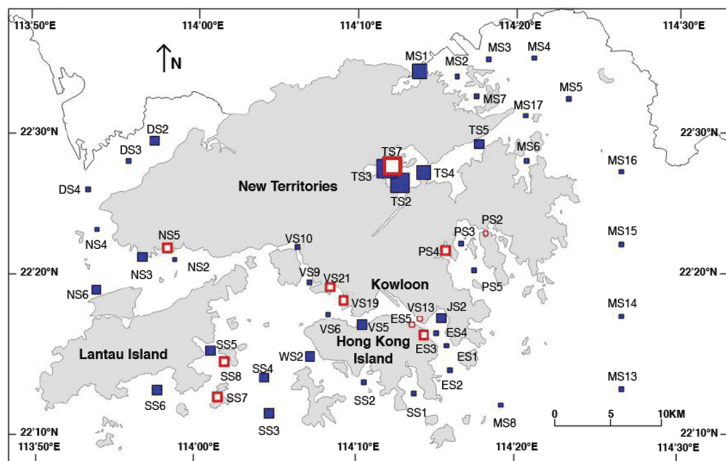

Chlorophyll-a (Chl) ■ 1.0-4.0 ■ 4.1-8.0 ■ 8.1-12.0 ■ >12.0µg/L

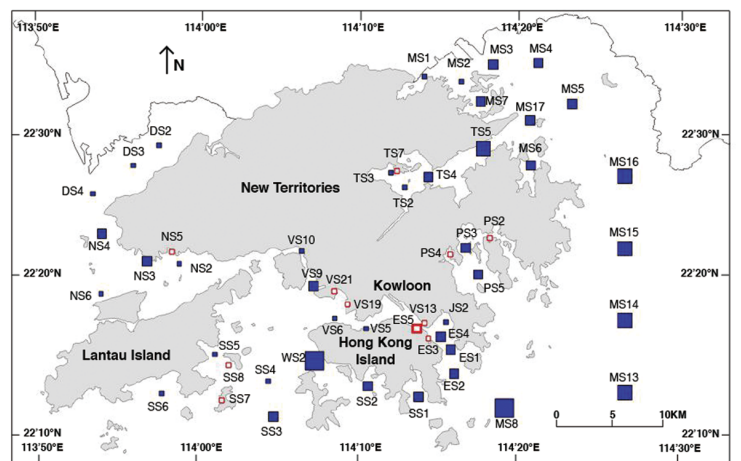

Water Depth(D) ■ 1-10 ■ 11-20 ■ 21-30 ■ >30m

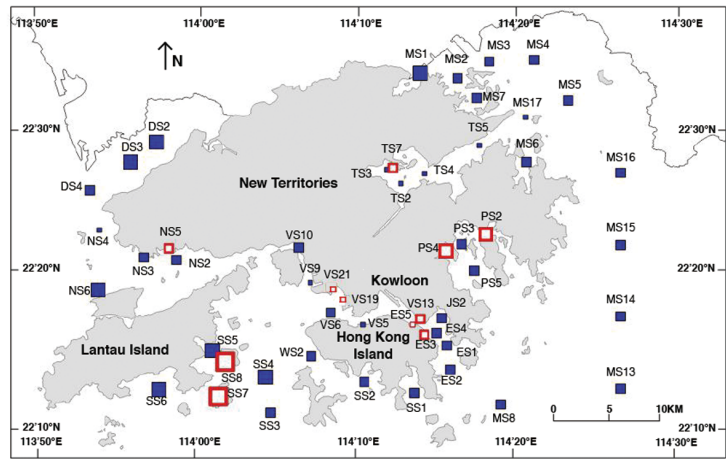

Dissolved Oxygen (DO) ■ 2.95-4.00 ■ 4.01-5.00 ■ 5.01-6.00 ■ >6.00mg/L

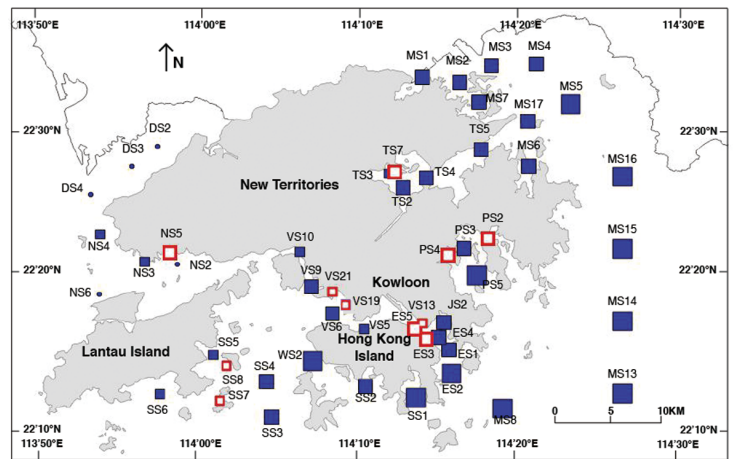

Salinity (Sal) ■ <30 ■ 30-31.5 ■ 31.6-33 ■ >33psu

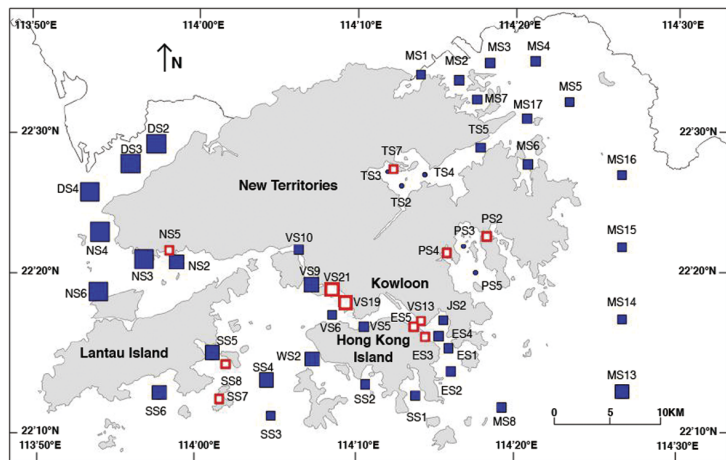

Turbidity (Tur) ■ 0-5 ■ 5.1-10 ■ 10.1-15 ■ >15NTU

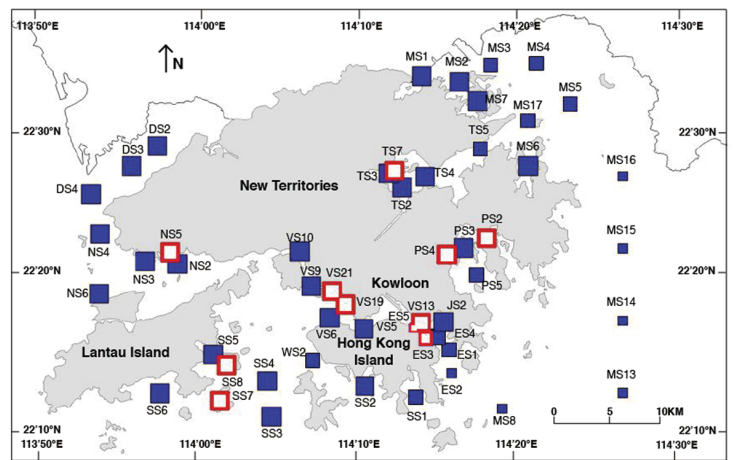

Summer Temperature (ST) ■ 23-24 ■ 24.1-25 ■ 25.1-26 ■ >26°C

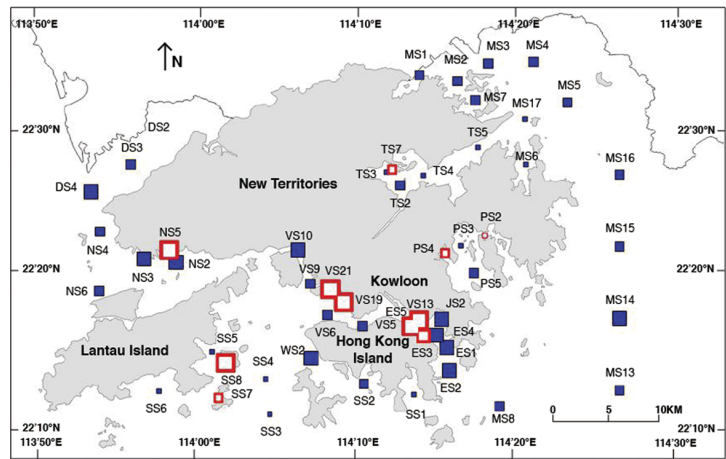

Winter Temperature (WT) ■ 19.0-19.5 ■ 19.51-20.0 ■ 20.01-20.5 ■ >20.5

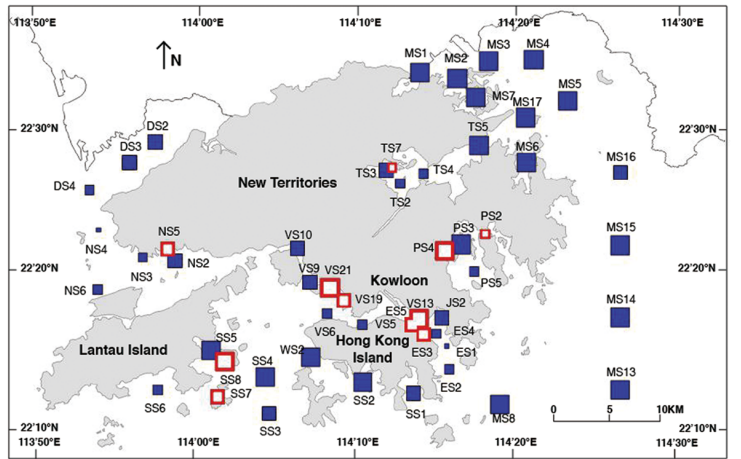

Mud Content (MD) ■ 40-55 ■ 55.1-70 ■ 70.1-85 ■ >85%w/w(<63µm)

Fig. 2



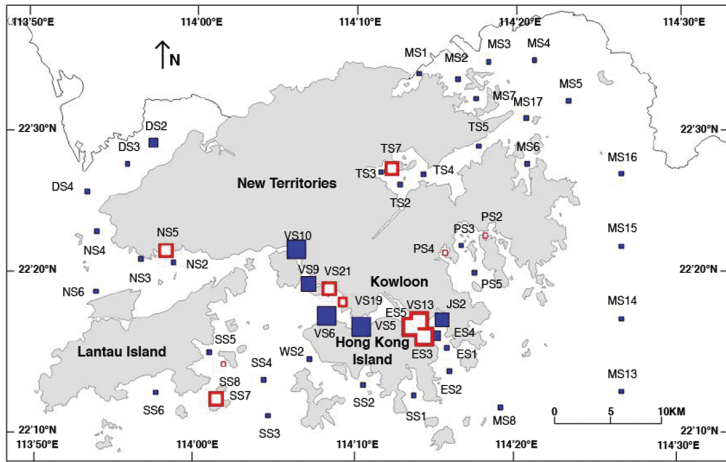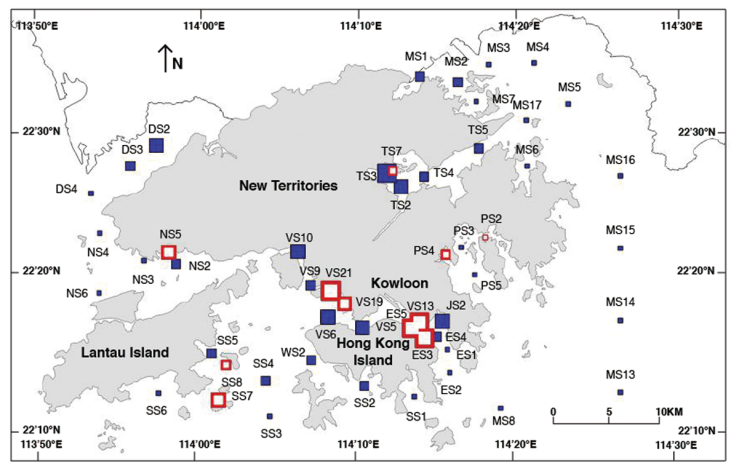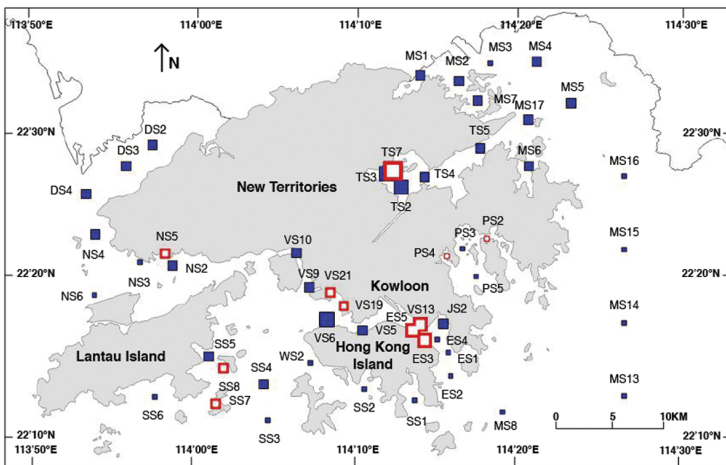

Fig. 3

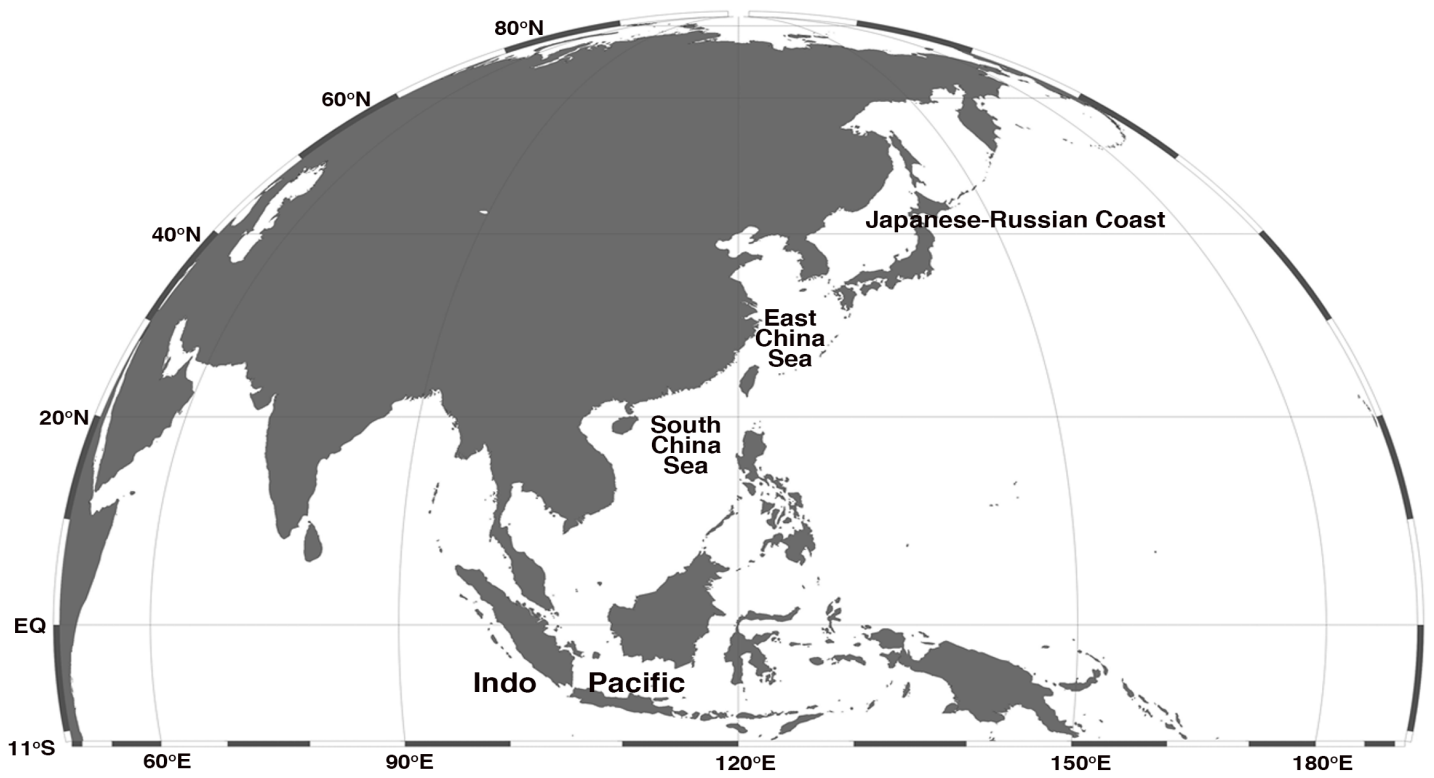

| Species                               | Indo Pacific | South China Sea | East China Sea | Japanese-Russian Coast |
|---------------------------------------|--------------|-----------------|----------------|------------------------|
| <i>Pistocythereis bradyi</i>          | (a)          | _____           | _____          | _____                  |
| <i>Bicornucythere bisanensis</i> s.l. |              | _____           |                |                        |
| <i>Nipponocythere bicarinata</i>      |              | _____           |                |                        |
| <i>Spinileberis quadriaculeata</i>    |              | (b)             |                |                        |
| <i>Phlytocythere japonica</i>         |              | _____           |                |                        |
| <i>Loxoconcha epeterseni</i>          |              | _____           |                |                        |
| <i>Sinocytheridea impressa</i>        | _____        |                 |                |                        |
| <i>Neomonoceratina delicata</i>       | _____        |                 |                |                        |
| <i>Keijella kloempitensis</i>         | _____        |                 |                |                        |
| <i>Neosinocythere elongata</i>        | (c)          | _____           |                |                        |
| <i>Stigmatocythere roesmani</i>       | _____        |                 |                |                        |
| <i>Hemicytheridea reticulata</i>      | _____        |                 |                |                        |
| <i>Loxoconcha malayensis</i>          | _____        |                 |                |                        |
| <i>Alocopocythere goujoni</i>         | (d)          | _____           |                |                        |
| <i>Hemikrithe orientalis</i>          | _____        |                 |                |                        |
| <i>Propontocypris</i> spp.            |              | _____           | _____          | _____                  |
| <i>Neonesidea</i> spp.                | (e)          | _____           | _____          | _____                  |
| <i>Xestoleberis</i> spp.              |              | _____           | _____          | _____                  |

Fig. 4

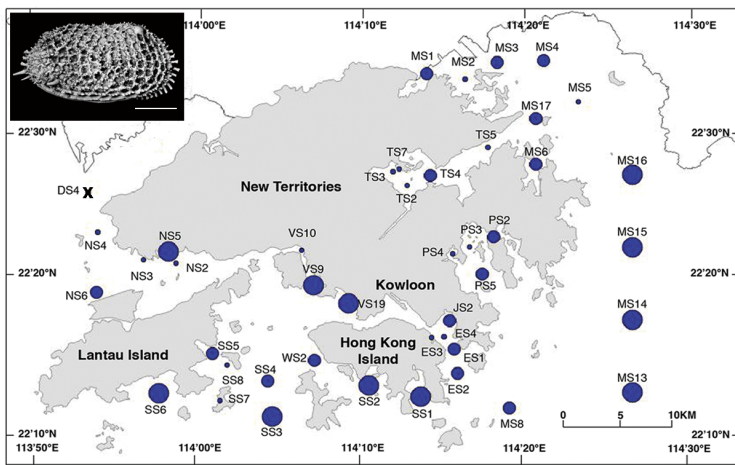

*Pistocythereis bradyi* 0% <= 5% 5% <= 10% 10% <= 15% x absent

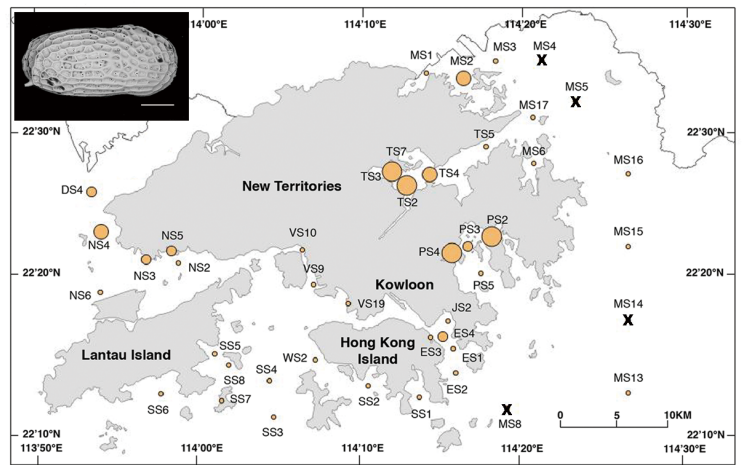

*Bicornucythere bisanensis* s.l. 0% <= 5% 5% <= 10% 10% <= 15% 15% <= 20% x absent

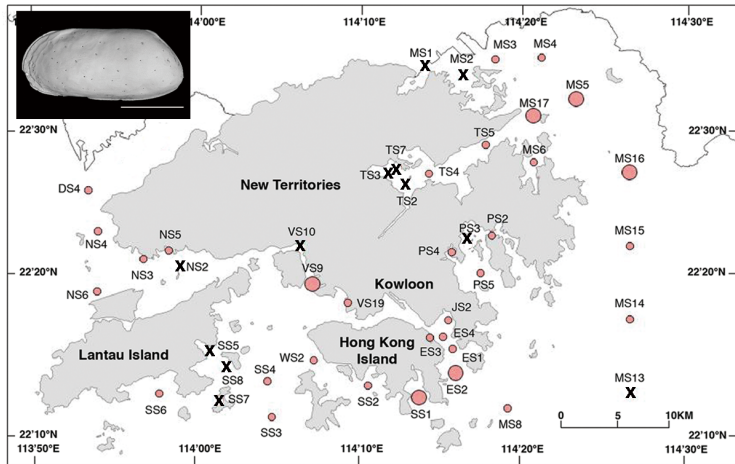

*Nipponocythere bicarinata* 0% <= 5% 5% <= 10% x absent

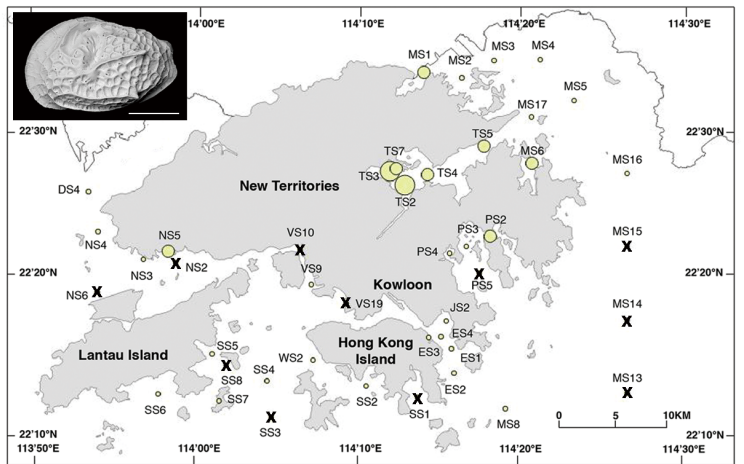

*Spinileberis quadriaculeata* 0% <= 5% 5% <= 10% 10% <= 15% x absent

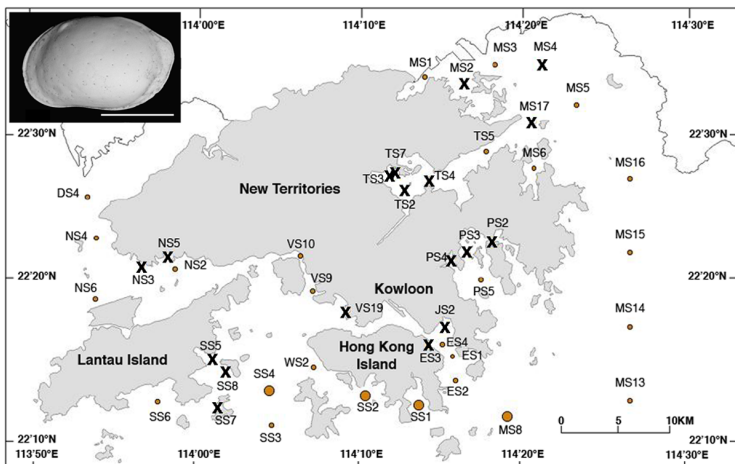

*Phlyctocythere japonica* 0% <= 3.5% 3.5% <= 7% x absent

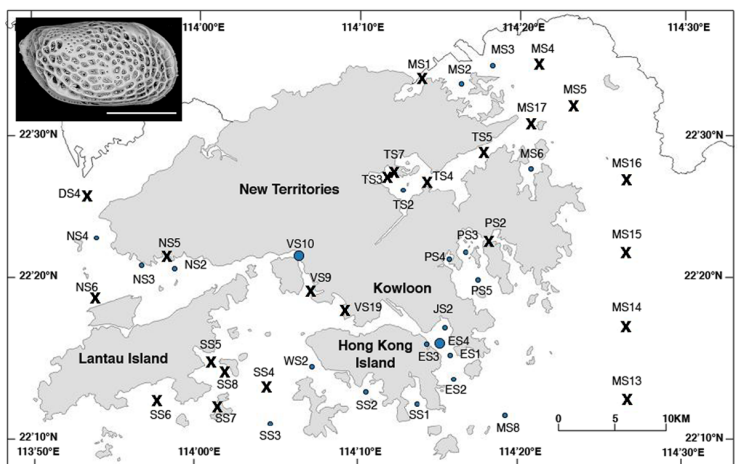

*Loxoconcha epeterseni* 0% <= 3% 3% <= 6% x absent

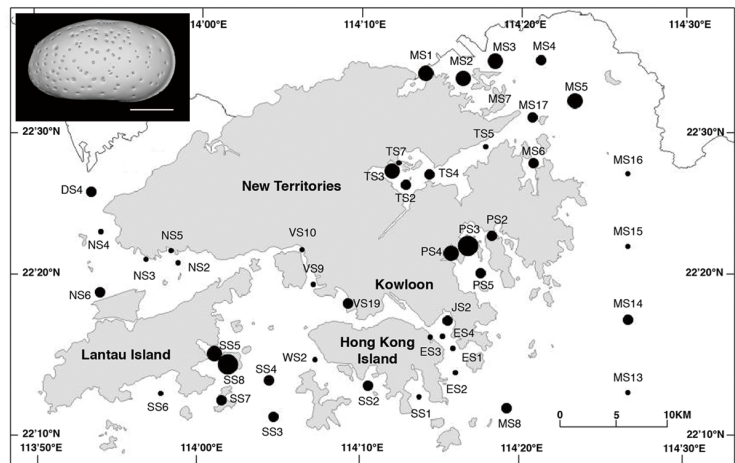

*Sinocythereidea impressa* 0% <= 20% 20% <= 40% 40% <= 60% 60% <= 80% x absent

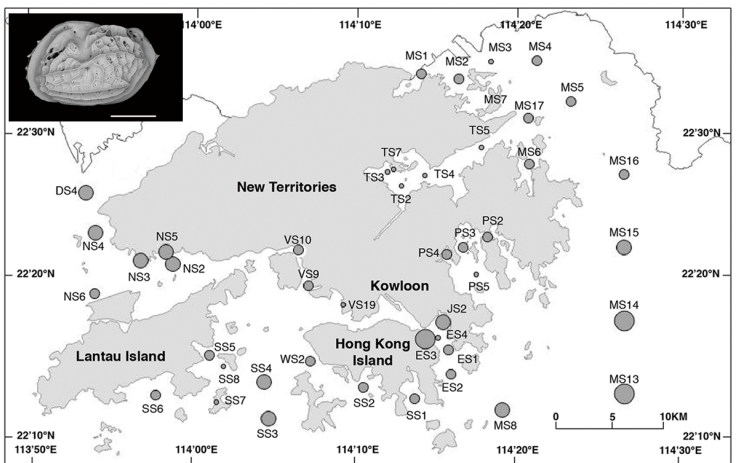

*Neomonoceratina delicata* 0% <= 10% 10% <= 20% 20% <= 30% 30% <= 40% x absent

Fig. 5

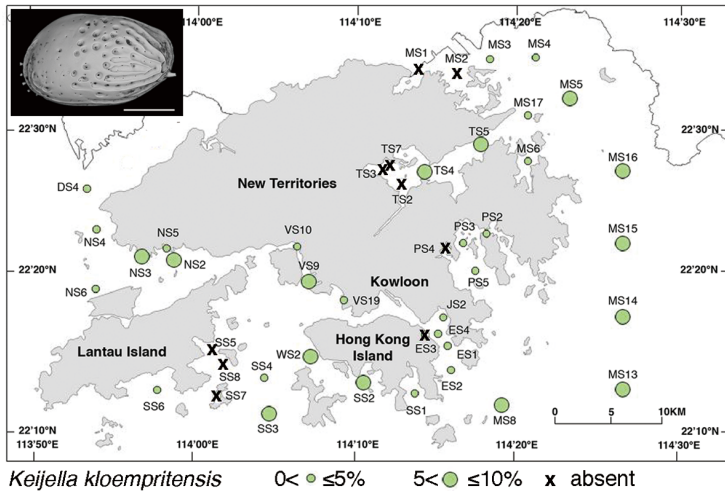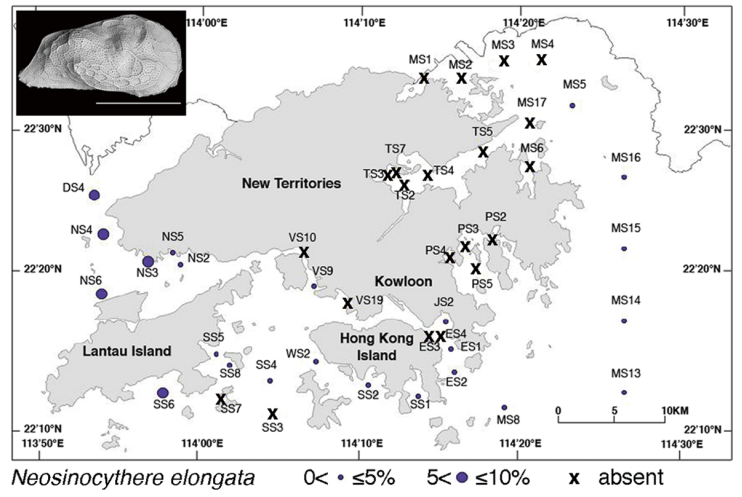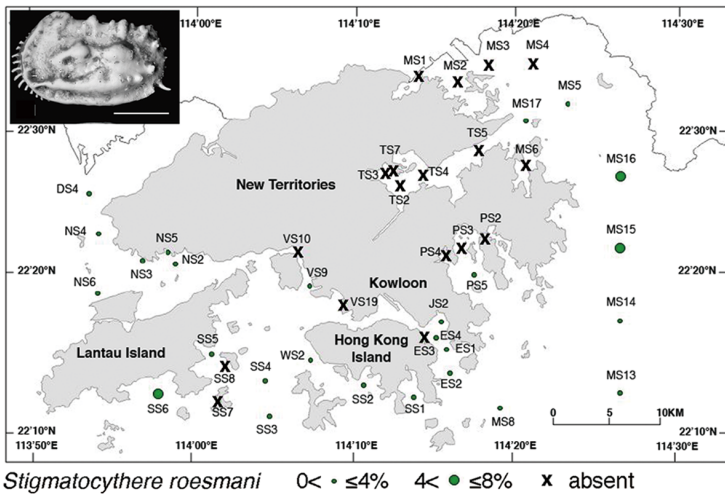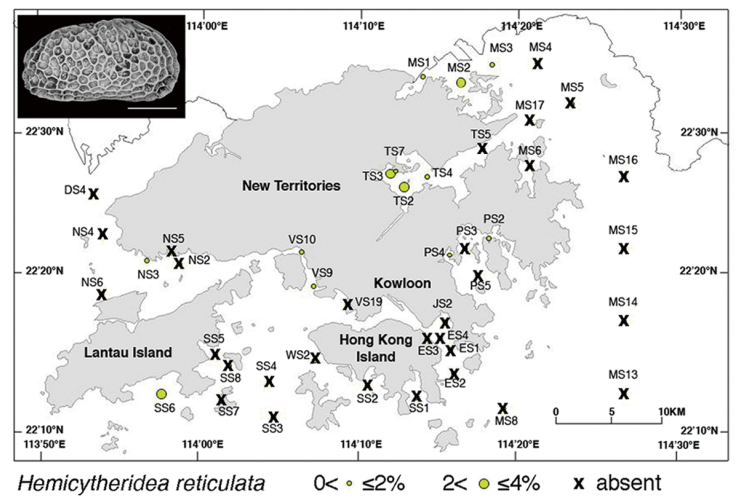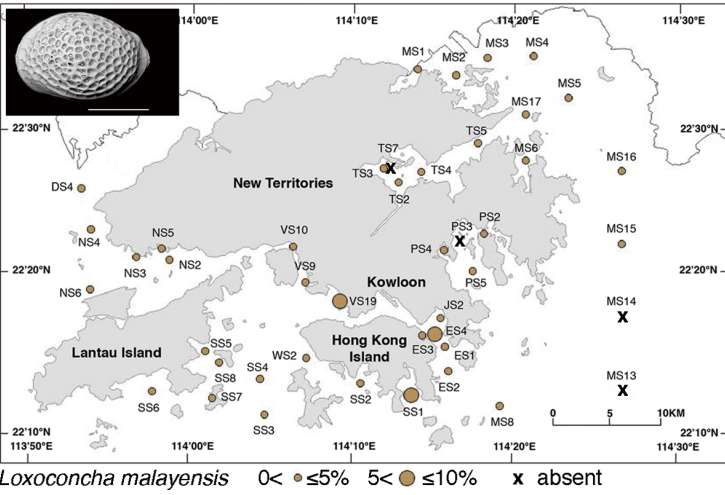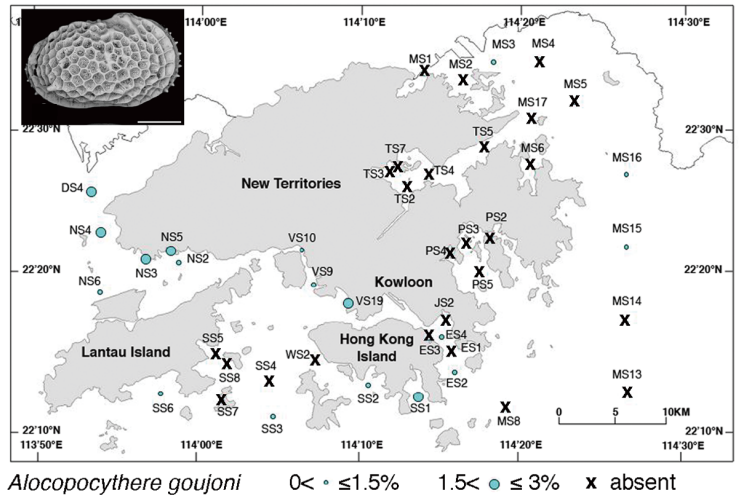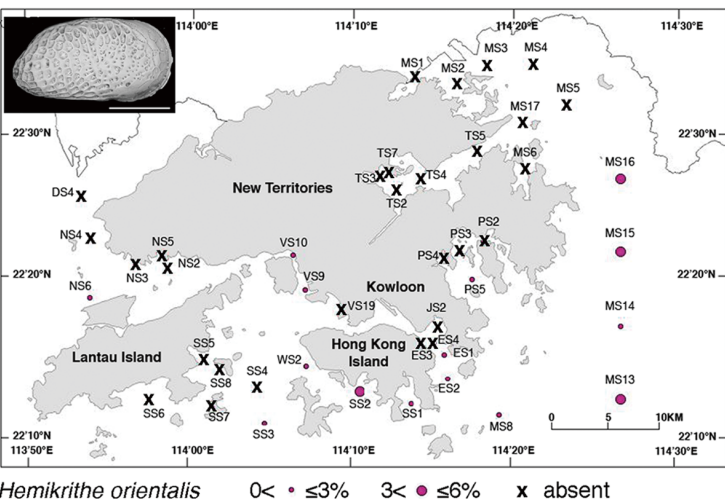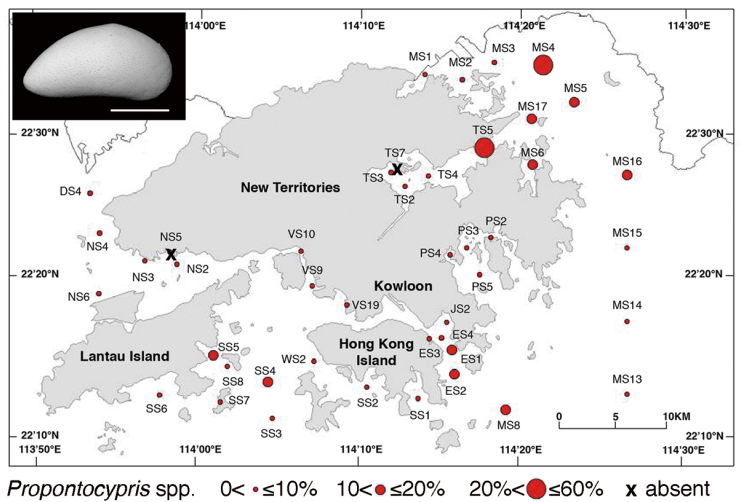

Fig. 6

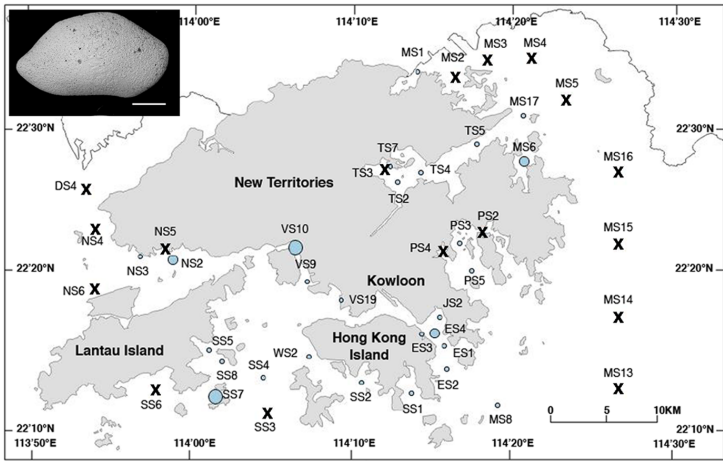

*Neonesidea* spp. 0 < • ≤ 5% 5 < • ≤ 10% 10 < • ≤ 20% x absent

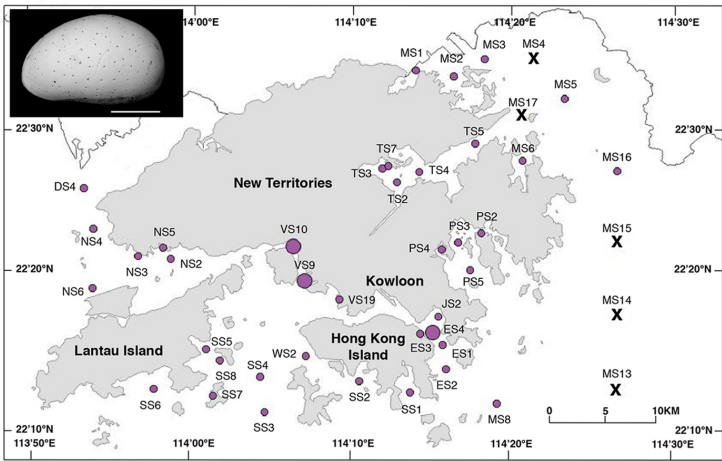

*Xestoleberis* spp. 0 < • ≤ 5% 5 < • ≤ 15% x absent

Fig. 7

Table 1.

| Parameter (Abbreviation)    | Unit         | Sampling Depth / Material | Season              |
|-----------------------------|--------------|---------------------------|---------------------|
| Chlorophyll- <i>a</i> (Chl) | µg/L         | Surface water             | All year            |
| Water Depth (D)             | m            |                           | All year            |
| Dissolved Oxygen (DO)       | mg/L         | Bottom water              | Summer <sup>1</sup> |
| Mud Content (MD)            | %w/w (<63µm) | Bottom sediment           | All year            |
| Salinity (Sal)              |              | Bottom water              | All year            |
| Turbidity (Tur)             | NTU          | Bottom water              | All year            |
| Summer Temperature (ST)     | °C           | Bottom water              | Summer <sup>1</sup> |
| Winter Temperature (WT)     | °C           | Bottom water              | Winter <sup>2</sup> |
| Copper (Cu)                 | mg/kg        | Bottom sediment           | All year            |
| Lead (Pb)                   | mg/kg        | Bottom sediment           | All year            |
| Zinc (Zn)                   | mg/kg        | Bottom sediment           | All year            |

Table 2.

| Model                                 | Chl          | D            | DO           | MD           | Sal           | Tur          | WT | Pb           | Zn          | R            | R <sup>2</sup> | AICc    | AW   |
|---------------------------------------|--------------|--------------|--------------|--------------|---------------|--------------|----|--------------|-------------|--------------|----------------|---------|------|
| <i>Pistocythereis bradyi</i>          |              |              |              |              |               |              |    |              |             |              |                |         |      |
| 1                                     |              | <b>-0.12</b> |              |              | <b>2.67</b>   |              |    | <b>-0.21</b> |             | <b>-0.06</b> | 0.61           | -163.64 | 0.52 |
| 2                                     |              | <b>-0.13</b> |              |              | <b>2.87</b>   | 0.04         |    | <b>-0.20</b> |             | <b>-0.05</b> | 0.61           | -159.79 | 0.08 |
| 3                                     |              | <b>-0.12</b> | 0.07         |              | <b>2.83</b>   |              |    | <b>-0.21</b> |             | <b>-0.07</b> | 0.60           | -159.42 | 0.06 |
| <i>Bicornucythere bisanensis</i> s.l. |              |              |              |              |               |              |    |              |             |              |                |         |      |
| 1                                     |              | <b>-0.09</b> |              | <b>-0.23</b> |               |              |    |              |             | <b>0.02</b>  | 0.60           | -137.80 | 0.12 |
| 2                                     |              | <b>-0.08</b> |              |              |               |              |    |              |             | <b>-0.01</b> | 0.56           | -136.77 | 0.07 |
| 3                                     |              |              |              | <b>-0.29</b> |               |              |    | <b>0.18</b>  |             | 0.00         | 0.58           | -136.77 | 0.05 |
| <i>Nipponocythere bicarinata</i>      |              |              |              |              |               |              |    |              |             |              |                |         |      |
| 1                                     | <b>-0.07</b> |              | <b>-0.12</b> |              |               |              |    |              |             | <b>0.03</b>  | 0.43           | -200.57 | 0.11 |
| 2                                     | <b>-0.09</b> |              |              |              |               |              |    |              |             | <b>0.03</b>  | 0.39           | -200.38 | 0.10 |
| 3                                     | <b>-0.09</b> | -0.03        | <b>-0.16</b> |              |               |              |    |              |             | <b>0.04</b>  | 0.45           | -199.30 | 0.06 |
| <i>Spinileberis quadriaculeata</i>    |              |              |              |              |               |              |    |              |             |              |                |         |      |
| 1                                     | 0.06         |              |              |              |               |              |    | <b>-0.09</b> |             | <b>-0.04</b> | 0.63           | -183.88 | 0.10 |
| 2                                     |              | <b>-0.05</b> |              |              |               |              |    |              |             | <b>0.02</b>  | 0.60           | -182.94 | 0.06 |
| 3                                     | <b>0.08</b>  |              |              |              |               |              |    | <b>-0.09</b> | -0.75       | <b>-0.04</b> | 0.65           | -182.66 | 0.05 |
| <i>Phlyctocythere japonica</i>        |              |              |              |              |               |              |    |              |             |              |                |         |      |
| 1                                     |              | <b>0.04</b>  |              |              |               |              |    |              |             | 0.00         | 0.28           | -238.60 | 0.19 |
| 2                                     |              | <b>0.03</b>  |              |              | 0.33          |              |    |              |             | -0.02        | 0.30           | -237.01 | 0.09 |
| 3                                     |              | <b>0.03</b>  |              |              |               |              |    | -0.02        |             | 0.00         | 0.27           | -235.62 | 0.04 |
| <i>Loxoconcha epeterseni</i>          |              |              |              |              |               |              |    |              |             |              |                |         |      |
| 1                                     |              | <b>0.03</b>  |              |              | <b>-0.33</b>  | <b>-0.03</b> |    |              |             | <b>0.01</b>  | 0.49           | -288.61 | 0.11 |
| 2                                     | <b>0.02</b>  | <b>0.04</b>  |              | <b>-0.04</b> | <b>-0.34</b>  | <b>-0.04</b> |    |              |             | <b>0.00</b>  | 0.56           | -287.76 | 0.07 |
| 3                                     | 0.02         | <b>0.04</b>  |              |              | <b>-0.34</b>  | <b>-0.04</b> |    |              |             | 0.00         | 0.51           | -287.31 | 0.06 |
| <i>Sinocytheridea impressa</i>        |              |              |              |              |               |              |    |              |             |              |                |         |      |
| 1                                     | <b>0.33</b>  |              | <b>-1.47</b> | <b>0.75</b>  | <b>-9.13</b>  |              |    |              |             | <b>0.34</b>  | 0.55           | -37.29  | 0.27 |
| 2                                     | <b>0.41</b>  |              | <b>-1.48</b> |              | <b>-8.75</b>  |              |    |              |             | <b>0.37</b>  | 0.50           | -35.24  | 0.10 |
| 3                                     |              |              | <b>-1.12</b> | <b>0.94</b>  | <b>-10.30</b> |              |    |              |             | <b>0.44</b>  | 0.49           | -34.78  | 0.08 |
| <i>Neomonoceratina delicata</i>       |              |              |              |              |               |              |    |              |             |              |                |         |      |
| 1                                     |              |              |              |              | <b>3.77</b>   | <b>0.34</b>  |    |              | <b>0.41</b> | <b>-0.13</b> | 0.48           | -82.57  | 0.29 |
| 2                                     |              |              | 0.43         |              | <b>5.02</b>   | <b>0.31</b>  |    |              | <b>0.39</b> | <b>-0.20</b> | 0.50           | -81.21  | 0.15 |
| 3                                     |              |              |              |              | <b>3.47</b>   | <b>0.33</b>  |    | -0.20        | <b>0.55</b> | <b>-0.12</b> | 0.48           | -79.32  | 0.06 |
| <i>Keijella kloempitensis</i>         |              |              |              |              |               |              |    |              |             |              |                |         |      |
| 1                                     |              | <b>0.06</b>  |              |              |               |              |    | <b>-0.06</b> |             | <b>-0.02</b> | 0.56           | -202.12 | 0.12 |
| 2                                     |              | <b>0.08</b>  |              |              |               |              |    |              |             | <b>-0.02</b> | 0.53           | -201.51 | 0.09 |
| 3                                     |              | <b>0.06</b>  |              | 0.09         |               |              |    | <b>-0.08</b> |             | <b>-0.02</b> | 0.58           | -200.86 | 0.06 |

| Model                            | Chl          | D            | DO           | MD           | Sal         | Tur          | WT          | Pb           | Zn           | R            | R <sup>2</sup> | AICc    | AW   |
|----------------------------------|--------------|--------------|--------------|--------------|-------------|--------------|-------------|--------------|--------------|--------------|----------------|---------|------|
| <i>Neosinocythere elongata</i>   |              |              |              |              |             |              |             |              |              |              |                |         |      |
| 1                                | <b>-0.02</b> |              |              |              |             | <b>0.09</b>  |             |              |              | <b>-0.03</b> | 0.76           | -244.70 | 0.09 |
| 2                                |              |              |              | <b>-0.06</b> |             | <b>0.08</b>  |             |              |              | <b>-0.03</b> | 0.76           | -244.42 | 0.08 |
| 3                                |              |              |              |              |             | <b>0.09</b>  |             |              |              | <b>-0.03</b> | 0.74           | -244.15 | 0.07 |
| <i>Stigmatocythere roesmani</i>  |              |              |              |              |             |              |             |              |              |              |                |         |      |
| 1                                |              |              |              |              |             |              |             | <b>-0.08</b> |              | <b>0.00</b>  | 0.23           | -225.23 | 0.07 |
| 2                                |              |              |              |              | 0.36        |              |             | <b>-0.07</b> |              | <b>-0.02</b> | 0.25           | -224.06 | 0.04 |
| 3                                |              |              | <b>0.10</b>  |              | <b>0.67</b> |              |             | <b>-0.07</b> |              | <b>0.30</b>  | 0.30           | -224.03 | 0.04 |
| <i>Hemicytheridea reticulata</i> |              |              |              |              |             |              |             |              |              |              |                |         |      |
| 1                                |              | <b>-0.03</b> |              |              |             |              |             | <b>-0.04</b> |              | <b>0.01</b>  | 0.23           | -270.79 | 0.14 |
| 2                                | 0.02         | <b>-0.02</b> |              |              |             |              |             | <b>-0.04</b> |              | 0.01         | 0.26           | -269.44 | 0.07 |
| 3                                | <b>0.03</b>  |              |              |              |             |              |             | <b>-0.03</b> |              | 0.00         | 0.19           | -268.64 | 0.05 |
| <i>Loxoconcha malayensis</i>     |              |              |              |              |             |              |             |              |              |              |                |         |      |
| 1                                |              | <b>-0.03</b> | <b>-0.14</b> | <b>-0.12</b> |             |              |             |              |              | <b>0.03</b>  | 0.55           | -229.55 | 0.10 |
| 2                                | <b>0.04</b>  |              | <b>-0.13</b> | <b>-0.12</b> |             |              |             |              |              | <b>0.02</b>  | 0.55           | -229.42 | 0.09 |
| 3                                |              | <b>-0.04</b> | <b>-0.14</b> | <b>-0.10</b> |             |              |             | -0.04        |              | <b>0.03</b>  | 0.57           | -228.47 | 0.06 |
| <i>Alocopocythere goujoni</i>    |              |              |              |              |             |              |             |              |              |              |                |         |      |
| 1                                |              |              |              |              | <b>0.21</b> |              |             |              |              | <b>-0.04</b> | 0.68           | -331.97 | 0.09 |
| 2                                |              | <b>-0.01</b> |              |              | <b>0.28</b> |              |             |              | <b>-0.01</b> | <b>-0.04</b> | 0.71           | -330.52 | 0.05 |
| 3                                |              | <b>-0.01</b> |              |              | <b>0.27</b> |              |             | <b>-0.02</b> |              | <b>-0.04</b> | 0.71           | -330.45 | 0.04 |
| <i>Hemikrithe orientalis</i>     |              |              |              |              |             |              |             |              |              |              |                |         |      |
| 1                                |              | <b>0.03</b>  |              |              |             |              | <b>0.46</b> |              |              | 0.00         | 0.19           | -249.44 | 0.11 |
| 2                                |              | <b>0.03</b>  | <b>0.07</b>  |              |             |              |             |              |              | 0.00         | 0.18           | -248.67 | 0.07 |
| 3                                |              | <b>0.04</b>  | 0.06         |              |             |              | <b>0.42</b> |              |              | 0.00         | 0.23           | -248.60 | 0.07 |
| <i>Propontocypris</i> spp.       |              |              |              |              |             |              |             |              |              |              |                |         |      |
| 1                                | <b>-0.28</b> |              |              | <b>0.46</b>  |             |              |             |              |              | <b>0.04</b>  | 0.20           | -72.47  | 0.15 |
| 2                                | <b>-0.24</b> |              |              |              |             |              |             |              |              | <b>0.07</b>  | 0.13           | -71.74  | 0.10 |
| 3                                | <b>-0.24</b> |              |              | <b>0.49</b>  |             |              | -2.46       |              |              | 0.02         | 0.22           | -70.76  | 0.06 |
| <i>Neonesidea</i> spp.           |              |              |              |              |             |              |             |              |              |              |                |         |      |
| 1                                | <b>-0.12</b> |              |              | <b>-0.25</b> |             |              |             |              | <b>0.19</b>  | <b>0.05</b>  | 0.28           | -149.00 | 0.09 |
| 2                                | <b>-0.11</b> |              | <b>0.33</b>  | <b>-0.24</b> |             |              | -1.13       |              | <b>0.20</b>  | <b>0.05</b>  | 0.31           | -147.86 | 0.05 |
| 3                                |              |              | 0.21         |              |             |              |             |              |              | 0.02         | 0.08           | -147.40 | 0.04 |
| <i>Xestoleberis</i> spp.         |              |              |              |              |             |              |             |              |              |              |                |         |      |
| 1                                |              | <b>0.04</b>  | <b>0.15</b>  | <b>-0.11</b> |             | <b>-0.08</b> |             | <b>0.05</b>  |              | <b>-0.02</b> | 0.62           | -225.55 | 0.09 |
| 2                                |              | <b>0.03</b>  | <b>0.15</b>  | <b>-0.09</b> |             | <b>-0.09</b> |             |              |              | <b>-0.02</b> | 0.59           | -225.29 | 0.08 |
| 3                                |              |              | <b>-0.09</b> |              |             | <b>-0.06</b> |             |              |              | <b>0.00</b>  | 0.52           | -224.60 | 0.06 |



Table 3.

| Term                                         | RI          | Coefficient  | Lower CI     | Upper CI     | Term                                    | RI          | Coefficient  | Lower CI      | Upper CI     |
|----------------------------------------------|-------------|--------------|--------------|--------------|-----------------------------------------|-------------|--------------|---------------|--------------|
| <b><i>Pistocythereis bradyi</i></b>          |             |              |              |              | <b><i>Loxococoncha epeterseni</i></b>   |             |              |               |              |
| R                                            | 1.00        | -0.06        | -0.15        | 0.04         | R                                       | 1.00        | 0.00         | -0.02         | 0.03         |
| <b>Sal</b>                                   | <b>1.00</b> | <b>2.71</b>  | <b>1.53</b>  | <b>3.88</b>  | <b>D</b>                                | <b>0.94</b> | <b>0.03</b>  | <b>0.00</b>   | <b>0.05</b>  |
| <b>D</b>                                     | <b>1.00</b> | <b>-0.12</b> | <b>-0.19</b> | <b>-0.06</b> | <b>Tur</b>                              | <b>0.76</b> | <b>-0.03</b> | <b>-0.06</b>  | <b>0.00</b>  |
| <b>Pb</b>                                    | <b>0.97</b> | <b>-0.21</b> | <b>-0.32</b> | <b>-0.10</b> | Sal                                     | 0.53        | -0.30        | -0.62         | 0.02         |
| Tur                                          | 0.12        | 0.04         | -0.07        | 0.15         | MD                                      | 0.38        | -0.04        | -0.08         | 0.01         |
| Zn                                           | 0.11        | -0.05        | -0.23        | 0.13         | Chl                                     | 0.30        | 0.02         | -0.01         | 0.04         |
| DO                                           | 0.10        | 0.06         | -0.18        | 0.31         | DO                                      | 0.26        | 0.04         | -0.02         | 0.10         |
| WT                                           | 0.10        | 0.33         | -0.98        | 1.64         | Pb                                      | 0.17        | 0.01         | -0.02         | 0.05         |
| Chl                                          | 0.09        | 0.02         | -0.08        | 0.11         | WT                                      | 0.13        | -0.13        | -0.48         | 0.22         |
| MD                                           | 0.08        | -0.01        | -0.20        | 0.18         | Zn                                      | 0.12        | 0.01         | -0.03         | 0.04         |
| <b><i>Bicornucythere bisanensis s.l.</i></b> |             |              |              |              | <b><i>Sinocytheridea impressa</i></b>   |             |              |               |              |
| R                                            | 1.00        | 0.01         | -0.11        | 0.12         | R                                       | 1.00        | 0.36         | -0.09         | 0.81         |
| MD                                           | 0.63        | -0.26        | -0.52        | 0.00         | <b>Sal</b>                              | <b>0.99</b> | <b>-9.26</b> | <b>-14.61</b> | <b>-3.91</b> |
| <b>D</b>                                     | <b>0.62</b> | <b>-0.08</b> | <b>-0.16</b> | <b>0.00</b>  | <b>DO</b>                               | <b>0.91</b> | <b>-1.42</b> | <b>-2.48</b>  | <b>-0.37</b> |
| Pb                                           | 0.38        | 0.14         | -0.05        | 0.33         | <b>MD</b>                               | <b>0.75</b> | <b>0.82</b>  | <b>0.07</b>   | <b>1.57</b>  |
| DO                                           | 0.20        | 0.17         | -0.15        | 0.48         | <b>Chl</b>                              | <b>0.74</b> | <b>0.82</b>  | <b>0.03</b>   | <b>0.70</b>  |
| Chl                                          | 0.19        | 0.06         | -0.07        | 0.19         | WT                                      | 0.20        | <b>0.82</b>  | -2.34         | 8.89         |
| Tur                                          | 0.19        | 0.07         | -0.08        | 0.22         | Zn                                      | 0.13        | <b>0.82</b>  | -0.68         | 0.51         |
| Zn                                           | 0.16        | -0.01        | -0.28        | 0.25         | Tur                                     | 0.11        | <b>0.82</b>  | -0.61         | 0.30         |
| Sal                                          | 0.12        | -0.02        | -1.86        | 1.82         | D                                       | 0.11        | <b>0.82</b>  | -0.29         | 0.41         |
| WT                                           | 0.10        | 0.06         | -1.80        | 1.92         | Pb                                      | 0.10        | <b>0.82</b>  | -0.62         | 0.46         |
| <b><i>Nipponocythere bicarinata</i></b>      |             |              |              |              | <b><i>Neomonoceratina delicata</i></b>  |             |              |               |              |
| R                                            | 1.00        | 0.02         | -0.04        | 0.09         | R                                       | 1.00        | -0.15        | -0.42         | 0.12         |
| <b>Chl</b>                                   | <b>0.92</b> | <b>-0.08</b> | <b>-0.14</b> | <b>-0.02</b> | <b>Zn</b>                               | <b>0.94</b> | <b>0.41</b>  | <b>0.11</b>   | <b>0.70</b>  |
| DO                                           | 0.50        | -0.14        | -0.30        | 0.02         | <b>Sal</b>                              | <b>0.93</b> | <b>4.06</b>  | <b>1.00</b>   | <b>7.13</b>  |
| D                                            | 0.30        | -0.03        | -0.08        | 0.02         | <b>Tur</b>                              | <b>0.84</b> | <b>0.33</b>  | <b>0.06</b>   | <b>0.59</b>  |
| WT                                           | 0.25        | -0.03        | -0.08        | 0.02         | DO                                      | 0.33        | 0.45         | -0.17         | 1.06         |
| Sal                                          | 0.24        | 0.51         | -0.35        | 1.36         | Pb                                      | 0.17        | -0.18        | -0.67         | 0.30         |
| Tur                                          | 0.19        | -0.04        | -0.11        | 0.04         | MD                                      | 0.14        | 0.25         | -0.33         | 0.84         |
| Zn                                           | 0.18        | -0.04        | -0.12        | 0.04         | D                                       | 0.11        | -0.01        | -0.22         | 0.20         |
| Pb                                           | 0.13        | -0.03        | -0.11        | 0.06         | WT                                      | 0.11        | -0.86        | -4.32         | 2.60         |
| MD                                           | 0.10        | 0.00         | -0.13        | 0.13         | Chl                                     | 0.09        | 0.00         | -0.24         | 0.23         |
| <b><i>Spinileberis quadriaculeata</i></b>    |             |              |              |              | <b><i>Keijella kloempritisensis</i></b> |             |              |               |              |
| R                                            |             | -0.01        | -0.10        | 0.07         | R                                       | 1.00        | -0.02        | -0.09         | 0.04         |
| <b>Tur</b>                                   | <b>0.66</b> | <b>-0.09</b> | <b>-0.17</b> | <b>0.00</b>  | <b>D</b>                                | <b>0.86</b> | <b>0.06</b>  | <b>0.02</b>   | <b>0.11</b>  |
| <b>Chl</b>                                   | <b>0.54</b> | <b>0.06</b>  | <b>0.00</b>  | <b>0.13</b>  | Pb                                      | 0.58        | -0.08        | -0.17         | 0.01         |
| D                                            | 0.45        | -0.05        | -0.10        | 0.01         | Sal                                     | 0.35        | 0.68         | -0.21         | 1.58         |
| WT                                           | 0.32        | -0.76        | -1.82        | 0.31         | MD                                      | 0.25        | 0.08         | -0.05         | 0.21         |
| DO                                           | 0.19        | 0.10         | -0.10        | 0.30         | Tur                                     | 0.24        | 0.05         | -0.03         | 0.14         |
| MD                                           | 0.17        | -0.07        | -0.23        | 0.09         | Chl                                     | 0.22        | -0.04        | -0.11         | 0.03         |
| Pb                                           | 0.17        | -0.05        | -0.16        | 0.07         | Zn                                      | 0.17        | 0.02         | -0.11         | 0.14         |
| Zn                                           | 0.14        | 0.03         | -0.09        | 0.15         | WT                                      | 0.14        | 0.33         | -0.55         | 1.22         |
| Sal                                          | 0.13        | 0.11         | -1.03        | 1.26         | DO                                      | 0.11        | 0.03         | -0.14         | 0.19         |
| <b><i>Phlyctocythere japonica</i></b>        |             |              |              |              | <b><i>Neosinocythere elongata</i></b>   |             |              |               |              |
| R                                            | 1.00        | -0.01        | -0.05        | 0.03         | R                                       | 1.00        | -0.03        | -0.07         | 0.00         |
| <b>D</b>                                     | <b>0.80</b> | <b>0.03</b>  | <b>0.01</b>  | <b>0.06</b>  | <b>Tur</b>                              | <b>1.00</b> | <b>0.08</b>  | <b>0.04</b>   | <b>0.13</b>  |
| Sal                                          | 0.42        | 0.46         | -0.10        | 1.02         | MD                                      | 0.33        | -0.05        | -0.13         | 0.02         |
| Pb                                           | 0.21        | -0.03        | -0.08        | 0.03         | Chl                                     | 0.30        | -0.02        | -0.05         | 0.01         |
| Zn                                           | 0.20        | -0.02        | -0.07        | 0.03         | WT                                      | 0.26        | -0.33        | -0.85         | 0.18         |
| WT                                           | 0.15        | 0.22         | -0.38        | 0.81         | Zn                                      | 0.21        | -0.02        | -0.06         | 0.02         |
| DO                                           | 0.14        | 0.03         | -0.08        | 0.15         | Pb                                      | 0.19        | -0.02        | -0.07         | 0.02         |
| Tur                                          | 0.12        | 0.00         | -0.05        | 0.05         | D                                       | 0.12        | 0.00         | -0.03         | 0.03         |
| Chl                                          | 0.12        | 0.00         | -0.04        | 0.05         | DO                                      | 0.12        | -0.02        | -0.11         | 0.07         |
| MD                                           | 0.11        | 0.00         | -0.09        | 0.08         | Sal                                     | 0.10        | 0.04         | -0.40         | 0.49         |

| Term                                    | RI          | Coefficient  | Lower CI     | Upper CI     | Term                                | RI          | Coefficient  | Lower CI     | Upper CI     |
|-----------------------------------------|-------------|--------------|--------------|--------------|-------------------------------------|-------------|--------------|--------------|--------------|
| <b><i>Stigmatocythere roesmani</i></b>  |             |              |              |              | <b><i>Hemikrithe orientalis</i></b> |             |              |              |              |
| R                                       | 1.00        | -0.01        | -0.07        | 0.05         | R                                   | 1.00        | 0.00         | -0.04        | 0.03         |
| Sal                                     | 0.61        | 0.62         | -0.04        | 1.27         | <b>D</b>                            | <b>0.77</b> | <b>0.03</b>  | <b>0.00</b>  | <b>0.05</b>  |
| <b>Pb</b>                               | <b>0.61</b> | <b>-0.06</b> | <b>-0.12</b> | <b>0.00</b>  | WT                                  | 0.46        | 0.43         | -0.07        | 0.93         |
| Tur                                     | 0.37        | 0.04         | -0.01        | 0.10         | DO                                  | 0.44        | 0.08         | -0.02        | 0.17         |
| Zn                                      | 0.31        | -0.05        | -0.11        | 0.02         | Sal                                 | 0.30        | 0.37         | -0.17        | 0.90         |
| DO                                      | 0.31        | 0.09         | -0.04        | 0.22         | Pb                                  | 0.22        | -0.03        | -0.08        | 0.02         |
| MD                                      | 0.23        | -0.06        | -0.16        | 0.04         | Tur                                 | 0.17        | 0.02         | -0.03        | 0.07         |
| Chl                                     | 0.19        | -0.02        | -0.07        | 0.02         | Chl                                 | 0.14        | -0.01        | -0.05        | 0.03         |
| WT                                      | 0.19        | 0.35         | -0.33        | 1.02         | Zn                                  | 0.11        | 0.00         | -0.05        | 0.05         |
| D                                       | 0.14        | -0.01        | -0.05        | 0.04         | MD                                  | 0.10        | -0.01        | -0.08        | 0.07         |
| <b><i>Hemicytheridea reticulata</i></b> |             |              |              |              | <b><i>Propontocypris spp.</i></b>   |             |              |              |              |
| R                                       | 1.00        | 0.01         | -0.02        | 0.03         | R                                   | 1.00        | 0.05         | -0.19        | 0.30         |
| <b>Pb</b>                               | <b>0.67</b> | <b>-0.04</b> | <b>-0.07</b> | <b>0.00</b>  | <b>Chl</b>                          | <b>0.80</b> | <b>-0.26</b> | <b>-0.47</b> | <b>-0.04</b> |
| <b>D</b>                                | <b>0.66</b> | <b>-0.02</b> | <b>-0.04</b> | <b>0.00</b>  | MD                                  | 0.58        | 0.50         | -0.03        | 1.03         |
| Chl                                     | 0.49        | 0.03         | 0.00         | 0.05         | WT                                  | 0.29        | -2.60        | -6.48        | 1.28         |
| WT                                      | 0.24        | -0.24        | -0.64        | 0.16         | Pb                                  | 0.19        | -0.18        | -0.55        | 0.20         |
| MD                                      | 0.23        | -0.03        | -0.09        | 0.02         | Sal                                 | 0.17        | -1.48        | -4.88        | 1.92         |
| Zn                                      | 0.17        | -0.01        | -0.06        | 0.05         | DO                                  | 0.15        | -0.27        | -0.99        | 0.45         |
| DO                                      | 0.13        | 0.02         | -0.05        | 0.10         | Zn                                  | 0.14        | -0.03        | -0.48        | 0.41         |
| Tur                                     | 0.13        | -0.01        | -0.05        | 0.03         | D                                   | 0.13        | 0.04         | -0.17        | 0.26         |
| Sal                                     | 0.11        | -0.05        | -0.43        | 0.34         | Tur                                 | 0.10        | 0.01         | -0.29        | 0.32         |
| <b><i>Loxoconcha malayensis</i></b>     |             |              |              |              | <b><i>Neonesidea spp.</i></b>       |             |              |              |              |
| R                                       | 1.00        | 0.02         | -0.02        | 0.06         | R                                   | 1.00        | 0.02         | -0.09        | 0.13         |
| <b>DO</b>                               | <b>0.87</b> | <b>-0.14</b> | <b>-0.25</b> | <b>-0.03</b> | <b>DO</b>                           | <b>0.72</b> | <b>0.30</b>  | <b>0.02</b>  | <b>0.57</b>  |
| <b>MD</b>                               | <b>0.85</b> | <b>-0.11</b> | <b>-0.20</b> | <b>-0.02</b> | Zn                                  | 0.58        | 0.15         | -0.01        | 0.31         |
| D                                       | 0.48        | -0.03        | -0.06        | 0.00         | MD                                  | 0.46        | -0.23        | -0.49        | 0.03         |
| Chl                                     | 0.40        | 0.03         | -0.01        | 0.08         | Chl                                 | 0.42        | -0.09        | -0.21        | 0.02         |
| Pb                                      | 0.29        | -0.04        | -0.10        | 0.02         | WT                                  | 0.32        | -1.13        | -2.69        | 0.42         |
| WT                                      | 0.26        | 0.41         | -0.21        | 1.03         | Tur                                 | 0.24        | -0.09        | -0.22        | 0.05         |
| Zn                                      | 0.20        | -0.03        | -0.10        | 0.04         | D                                   | 0.23        | 0.05         | -0.04        | 0.15         |
| Sal                                     | 0.15        | -0.26        | -0.91        | 0.39         | Pb                                  | 0.17        | 0.05         | -0.13        | 0.24         |
| Tur                                     | 0.11        | -0.01        | -0.07        | 0.05         | Sal                                 | 0.15        | -0.60        | -2.20        | 1.01         |
| <b><i>Alocopocythere goujoni</i></b>    |             |              |              |              | <b><i>Xestoleberis spp.</i></b>     |             |              |              |              |
| R                                       | 1.00        | -0.03        | -0.05        | -0.02        | R                                   | 1.00        | -0.01        | -0.06        | 0.05         |
| <b>Sal</b>                              | <b>0.78</b> | <b>0.22</b>  | <b>0.03</b>  | <b>0.41</b>  | <b>Tur</b>                          | <b>0.77</b> | <b>-0.07</b> | <b>-0.12</b> | <b>-0.01</b> |
| D                                       | 0.46        | -0.01        | -0.02        | 0.00         | <b>MD</b>                           | <b>0.66</b> | <b>-0.10</b> | <b>-0.19</b> | <b>0.00</b>  |
| DO                                      | 0.43        | -0.03        | -0.07        | 0.01         | <b>DO</b>                           | <b>0.63</b> | <b>0.13</b>  | <b>0.00</b>  | <b>0.26</b>  |
| Pb                                      | 0.31        | -0.01        | -0.03        | 0.01         | D                                   | 0.42        | 0.03         | -0.01        | 0.07         |
| Zn                                      | 0.29        | -0.01        | -0.03        | 0.01         | Pb                                  | 0.33        | 0.04         | -0.02        | 0.11         |
| WT                                      | 0.24        | 0.13         | -0.08        | 0.33         | Sal                                 | 0.27        | 0.46         | -0.24        | 1.15         |
| Tur                                     | 0.18        | 0.01         | -0.01        | 0.03         | WT                                  | 0.19        | -0.37        | -1.06        | 0.31         |
| MD                                      | 0.14        | -0.01        | -0.04        | 0.02         | Zn                                  | 0.14        | 0.00         | -0.09        | 0.08         |
| Chl                                     | 0.11        | 0.00         | -0.01        | 0.01         | Chl                                 | 0.10        | 0.00         | -0.05        | 0.05         |

Table 4.

| Environmental Variables | GVIF    | Df | GVIF <sup>1/2Df</sup> |
|-------------------------|---------|----|-----------------------|
| Chl                     | 7.40    | 1  | 2.72                  |
| D                       | 6.41    | 1  | 2.53                  |
| DO                      | 4.49    | 1  | 2.12                  |
| MD                      | 3.72    | 1  | 1.93                  |
| Sal                     | 9.43    | 1  | 3.07                  |
| Tur                     | 6.67    | 1  | 2.58                  |
| Pb                      | 9.98    | 1  | 3.16                  |
| Zn                      | 10.05   | 1  | 3.17                  |
| WT                      | 2.39    | 1  | 1.55                  |
| R                       | 1266.30 | 9  | 1.49                  |

Table 5

| Taxa                                  | Chl | D | DO | MD | Sal | Tur | WT | Pb | Zn | R |
|---------------------------------------|-----|---|----|----|-----|-----|----|----|----|---|
| <i>Pistocythereis bradyi</i>          |     | - |    |    | +   |     |    | -  |    |   |
| <i>Bicornucythere bisanensis</i> s.l. |     | - |    |    |     |     |    |    |    |   |
| <i>Nipponocythere bicarinata</i>      | -   |   |    |    |     |     |    |    |    |   |
| <i>Spinileberis quadriaculeata</i>    | +   |   |    |    |     | -   |    |    |    |   |
| <i>Phlyctocythere japonica</i>        |     | + |    |    |     |     |    |    |    |   |
| <i>Loxoconcha epeterseni</i>          |     | + |    |    |     | -   |    |    |    |   |
| <i>Sinocytheridea impressa</i>        | +   |   | -  | +  | -   |     |    |    |    |   |
| <i>Neomonoceratina delicata</i>       |     |   |    |    | +   | +   |    |    | +  |   |
| <i>Keijella kloempitensis</i>         |     | + |    |    |     |     |    |    |    |   |
| <i>Neosinocythere elongata</i>        |     |   |    |    |     | +   |    |    |    |   |
| <i>Stigmatocythere roesmani</i>       |     |   |    |    |     |     |    | -  |    |   |
| <i>Hemicytheridea reticulata</i>      |     | - |    |    |     |     |    | -  |    |   |
| <i>Loxoconcha malayensis</i>          |     |   | -  | -  |     |     |    |    |    |   |
| <i>Alocopocythere goujoni</i>         |     |   |    |    | +   |     |    |    |    |   |
| <i>Hemikrithe orientalis</i>          |     | + |    |    |     |     |    |    |    |   |
| <i>Propontocypris</i> spp.            | -   |   |    |    |     |     |    |    |    |   |
| <i>Neonesidea</i> spp.                |     |   | +  |    |     |     |    |    |    |   |
| <i>Xestoleberis</i> spp.              |     |   | +  | -  |     | -   |    |    |    |   |
