# Supplementary material for: Baseline for ostracod-based northwestern Pacific and Indo-Pacific shallow-marine paleoenvironmental reconstructions: ecological modeling of species distributions
Source: Copernicus journal article supplement (doi:10.5194/bg-2018-405), 2018-10-15
Supplement: Supplementary file [file bg-2018-405-RC3-supplement.pdf]

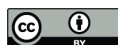

1

2

3

4 **Baseline for ostracod-based northwestern Pacific and Indo-Pacific shallow-**  
5 **marine paleoenvironmental reconstructions: ecological modeling of species**  
6 **distributions**

7

8 Yuanyuan Hong<sup>1,2,\*</sup>, Moriaki Yasuhara<sup>1,2,\*</sup>, Hokuto Iwatani<sup>1,2</sup>, Briony Mamo<sup>1,2</sup>

9

10

11 <sup>1</sup>School of Biological Sciences, The University of Hong Kong, Pok Fu Lam Road,  
12 Hong Kong SAR, China

13 <sup>2</sup>Swire Institute of Marine Science, The University of Hong Kong, Cape d'Aguilar  
14 Road, Shek O, Hong Kong SAR, China

15

16 \*Corresponding authors: Hong, Y.Y. ([yocircl@gmail.com](mailto:yocircl@gmail.com)); Yasuhara, M.  
17 ([moriakiyasuhara@gmail.com](mailto:moriakiyasuhara@gmail.com)).

18

19

20

21

22

23

24

25

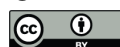

26

27

28 Abstract:

29 Fossil ostracods have been widely used for Quaternary paleoenvironmental  
30 reconstructions especially in marginally marine environments (e.g. for water depth,  
31 temperature, salinity, oxygen levels, pollution). But our knowledge of the autoecology  
32 of indicator species, the base of paleoenvironmental reconstructions, remains limited  
33 and commonly lacks robust statistical support and comprehensive comparison with  
34 environmental data. We analysed marginally marine ostracod taxa at 52 sites in Hong  
35 Kong for which comprehensive environmental data are available. We applied linear  
36 regression models to reveal relationships between species distribution and  
37 environmental factors, and identified indicator species of environmental parameters.  
38 For example, *Sinocytheridea impressa* and *Neomonoceratina delicata* indicate  
39 bottom-water hypoxia – eutrophication, and heavy-metal pollution - increased  
40 turbidity, respectively. Many taxa are widespread throughout the northwestern Pacific  
41 – Indo-Pacific regions, including temperate (South China Sea to Japan and Russia),  
42 subtropical (i.e., Indo-Pacific to the East China Sea), and tropical (i.e., Indo-Pacific  
43 and South China Sea) taxa. With statistical support from ecological modeling and  
44 comprehensive environmental data, These results provide a robust baseline for  
45 ostracod-based Quaternary-Anthropocene paleoenvironmental reconstructions in the  
46 tropic–extratropic northwestern Pacific and Indo-Pacific.

47

48 Key words: Autoecology, Distribution modeling, Indicator species, Ostracoda,  
49 Paleoenvironmental reconstruction, Proxy.

50

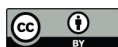

51    **Key points**

52    1. We provide a robust baseline for ostracod (microscopic Arthropods) based  
53    paleoenvironmental reconstructions from Quaternary and Anthropocene marginal  
54    marine sediments.

55    2. The studied species have wide distributions over the tropics and extratropics of the  
56    northwestern Pacific and Indo-Pacific.

57    3. Ecological modeling established reliable indicator ostracod species for  
58    paleoenvironmental reconstructions.

59

60

61

62    **1. Introduction**

63    Because of their small size, high abundance and excellent fossil record, fossil  
64    ostracods (microcrustaceans), have been widely used to reconstruct Quaternary  
65    environmental conditions including water-depth, salinity, temperature, oxygen, and  
66    pollution, especially in marginal marine sediments (Boomer & Eisenhauer, 2002;  
67    Cronin, 2015; Frenzel & Boomer, 2005; Horne et al., 2012; Ruiz et al., 2005). In the  
68    northwestern Pacific and Indo-Pacific there are numerous, widely distributed deltas  
69    (Woodroffe et al., 2006) hosting accumulated Holocene marine sediments. Many  
70    studies have reconstructed the depositional environments of these sediments (Alberti  
71    et al., 2013; Dong et al., 2012; Irizuki et al., 2015b; Tanaka et al., 2011; Yasuhara &  
72    Seto, 2006; Yasuhara et al., 2005; Zhou et al., 2015). Due to high sedimentation rates  
73    (> 1 cm per year), fossil ostracods allow high-resolution reconstructions of human-  
74    induced environmental changes (pollution, eutrophication, bottom oxygen depletion)  
75    over the past century (Irizuki et al., 2011; Yasuhara et al., 2003).



76

77           Many have evaluated the autoecology of indicator species as the basis for the  
78 paleoenvironmental reconstructions (Hazel, 1988; Irizuki et al., 2003; Ozawa et al.,  
79 2004; Stepanova et al., 2003; Wang et al., 1988; Yasuhara & Seto, 2006; Zhao, 1984;  
80 Zhao & Wang, 1988a, 1988b). Yet these studies tend to focus on only one or few  
81 targeted environmental factor(s) and lack rigorous statistical evaluation, particularly  
82 statistical modeling, a common approach in contemporary ecology. This is probably  
83 due to the facts that comprehensive environmental dataset are often unavailable and  
84 an ecological modeling approach (especially regression modeling and model selection)  
85 has not been common in the field of micropaleontology.

86

87           Hong Kong is an ideal location for the marine ecological modeling approach  
88 valid for the northwestern Pacific and Indo-Pacific, because of its extensive and  
89 intensive marine environmental monitoring program, which provides robust datasets  
90 for ecological modeling and its subtropical location, where tropical and temperate  
91 species coexist, which allows investigations of species with different latitudinal and  
92 geographical distributions. We employed regression modeling of Hong Kong  
93 shallow-marine ostracod species to show statistical relationships between species  
94 abundance, distribution and environmental factors. This study allows the autoecology  
95 and statistical evaluation of common tropical and extratropical species, providing a  
96 baseline for ostracod-based shallow-marine paleoenvironmental reconstructions of the  
97 northwestern Pacific and Indo-Pacific regions.

98

99   **2. Study area**





100 Hong Kong is situated at the southeastern corner of the Pearl River (Zhujiang) Delta,  
101 and has an area of 2500 km<sup>2</sup> (Fig. 1), at 22° 12.021' to 22° 33.817' N latitude, 113°  
102 53.388' to 114° 26.920' E longitude. It is an ideal location to study natural and/or  
103 anthropogenic impacts on benthic communities due to its complex hydrology and  
104 long history of human influence. Western Hong Kong is affected by input from the  
105 Pearl River, particularly during the summer heavy rainfall (Morton & Wu, 1975),  
106 when salinity of the surface waters is strongly influenced by rainfall. Eastern Hong  
107 Kong waters are mainly marine and derived from the South China Sea. As one of the  
108 most urbanized coastal areas in the world, human activities, including rapid  
109 industrialization, sewage discharge, trawling, dredging and land reclamation have led  
110 to a deteriorated marine benthic ecosystem (Blackmore, 1998; Hodgkiss & Yim, 1995;  
111 Hong et al., 2017; Hu et al., 2008; Morton, 1996; Morton & Blackmore, 2001; Owen  
112 & Sandhu, 2000; Shin, 1977; Tanner et al., 2000).

113

### 114 3. Materials and Methods

#### 115 3.1. Samples and laboratory procedure

116 In January and July of 2011 we used a Van Veen Grab to collect 100 ml of sediment  
117 from the uppermost cm of the sea floor from 52 sites in Hong Kong marine waters  
118 (Fig. 1; Supplement A), 41 of which are in open waters and 11 in typhoon shelter sites.  
119 Typhoon shelters are semi-enclosed areas of water designed to protect moored vessels  
120 in extreme weather (Environmental Protection Department, 2011). All sites are  
121 included in the Hong Kong EPD marine water and sediment quality monitoring  
122 program, which has been conducted monthly since 1986 (for water) and biannually  
123 (for sediment), providing comprehensive environmental data for all stations (see  
124 below).



125 Sediments were wet-sieved over a 63  $\mu\text{m}$  mesh sieve and air dried or oven-  
126 dried at 40 °C. The residue was dry-sieved over a 150  $\mu\text{m}$  mesh sieve, and ostracod  
127 specimens larger than 150  $\mu\text{m}$  were picked; smaller individuals were not included to  
128 avoid problems of identification in small, early instar juveniles. In samples containing  
129 fewer than 200 specimens, we picked all individuals. If there were more than 200  
130 specimens, we picked ostracods from a split. We identified each counted specimen to  
131 species level when possible. We considered both an entire carapace or a single valve  
132 as one individual for counting.

133

### 134 **3.2 Environmental Variables**

135 We selected parameters from the EPD monitoring program (Table 1) for our  
136 regression modeling (see below), including surface productivity (Chlorophyll-a, Chl;  
137 Fig. 2), water depth (D; Fig. 2), bottom water dissolved oxygen (DO; Fig. 2), bottom  
138 water salinity (Sal; Fig. 2), turbidity (Tur; Fig. 2), summer bottom water temperature  
139 (ST – June to September average; Fig. 2), winter bottom water temperature (WT –  
140 November to February average; Fig. 2), mud content (MD; Fig. 2), and heavy metal  
141 concentration (Cu, Zn, and Pb; Fig. 3). These parameters are known to control  
142 ostracod faunal properties (Cronin, 2015; Cronin & Vann, 2003; Hazel, 1988; Ikeya  
143 & Shiozaki, 1993; Irizuki et al., 2005; Ruiz et al., 2005; Yasuhara et al., 2007;  
144 Yasuhara et al., 2012b). We used averages over the entire monitoring period (1986–  
145 2011), because the ostracods in this study were mostly dead shells, thus the samples  
146 should be considered time averaged. Bottom water DO is the average of the summer  
147 season (June–September), due to the likely importance of summer bottom water  
148 oxygen depletion.

149



#### 150    **4. Regression modeling**

151    Multiple linear regression modeling was used to determine the relationship between  
152    common ostracod species (relative abundance of each species) and environmental  
153    parameters (Supplement B). All environmental parameters were log-transformed and  
154    zero centered. Salinity outliers (salinity <25: DS2 and DS3) and samples with low  
155    abundance (<50 specimens: ES5, MS7, VS21, VS5 & VS6) were removed from the  
156    models.

157            The best-fitting models were selected based on Akaike's Information Criterion  
158    (AICc) for small sample size, in which the lower score indicates the better model  
159    support considering both goodness-of-fit and model complexity (Anderson &  
160    Burnham, 2002). Akaike weights were used to summarize proportional support for all  
161    candidate models (Anderson et al., 2000) (Table 2). We considered parameter  
162    estimates averaged over models, proportional to the support that each model received  
163    (Anderson et al., 2000) (Table 3). This approach accounts for the uncertainty in model  
164    selection and thus leads to appropriately broader confidence intervals than obtained  
165    by relying only on the single, best-supported model. The relative importance of  
166    various predictor variables was measured by the sum of Akaike weights of models  
167    that included the variables in question (Brunham & Anderson, 2002).

168            We explored linear dependencies by computing variance inflation factors (VIF)  
169    (Legendre & Legendre, 1998) and pairwise correlations between predictor variables  
170    to assess whether multicollinearity was likely to influence regression results  
171    (Yasuhara et al., 2012b). The degree of freedom is more than one for the geographic  
172    region variable (see below), thus we computed generalized variance inflation factors  
173    (GVIF). For continuous variables, GVIF (Table 4) is the same as VIF, but for  
174    categorical variables, GVIF has degrees of freedom (Df) equal to the number of



175 coefficients associated with it (Hendrickx et al., 2004). Thus, we used  $GVIF^{1/2df}$  to  
 176 make GVIF values comparable among those with different Df.  $VIF > 20$  is usually  
 177 indicative of high collinearity (Legendre & Legendre, 1998). Thus we calculated an  
 178 equivalent threshold of 4.47 (equal to  $\sqrt{20}$ ) for  $GVIF^{1/2df}$  to assess conlinearity. Also,  
 179 adjusted  $R^2 > 0.8$  indicates a strong correlation of variables (Hoffman, 2015). In all  
 180 datasets, summer temperature (ST) and water depth (D) were highly correlated  
 181 ( $R^2=0.8217$ ), and the GVIFs of ST and Cu are  $>20$ , indicating that these correlations  
 182 may influence regression results. Thus, we re-ran the linear regression modeling  
 183 without ST and Cu. The new GVIFs of all variables were under 4.47 (Table 4).

184 We considered the degree of spatial autocorrelation in model residuals by the  
 185 calculation of Moran's  $I$  index for the five best models. The neighborhood size was  
 186 set as 2, 5, 10, 20 and 50 km. We found significant spatial autocorrelation in model  
 187 residuals for many cases, thus we forced the geographic region variable (R) (Water  
 188 Control Zones defined by EPD) to be included in all models. After this treatment,  
 189 spatial autocorrelation was detected only in a few models for *Propontocypris* spp.,  
 190 *Stigmatocythere roesmani*, and *Hemikrithe orientalis*.

191 The multiple linear regression model analyses were implemented in R  
 192 programming language (R Core Team, 2016). We used 'M<sub>U</sub>MI<sub>N</sub>' (Bartoń, 2013) for  
 193 model averaging and 'SPDEP' (Bivand & Piras, 2015) to measure spatial  
 194 autocorrelation.

195

## 196 5. Results and discussions

197 The comprehensive ostracod dataset for the 52 sites and the environmental variables  
 198 enabled us to elucidate distribution patterns of common ostracod taxa and their related  
 199 environmental factor(s). We identified 151 species belonging to 76 genera

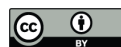

(Supplement A). Among them, 18 common taxa (mainly species, a few genera) of *Sinocytheridea impressa*, *Neomonoceratina delicata*, *Propontocypris* spp., *Pistocythereis bradyi*, *Bicornucythere bisanensis* s.l., *Keijella kloempritsensis*, *Nipponocythere bicarinata*, *Spinileberis quadriaculeata*, *Xestoleberis* spp., *Loxoconcha malayensis*, *Neonesidea* spp., *Neosinocythere elongata*, *Stigmatocythere roesmani*, *Phlyctocythere japonica*, *Alocopocythere goujoni*, *Hemikrithe orientalis*, *Loxoconcha epeterseni* and *Hemicytheridea reticulata* (Supplement B) were used for regression modelling, and their relative abundances (to the total ostracod abundance in a sample) show a significant relation with environmental parameters. The best three regression models are presented in Table 2 and the model-averaged parameter estimates in Table 3.

Relative abundance of *S. impressa* [= *Sinocytheridea latiovata*; see Whatley and Zhao (1988a)] was strongly correlated with salinity (negative), dissolved oxygen (negative), mud content (positive) and productivity (positive) (Tables 2 and 3). The species is noticeably dominant in areas characterized by a muddy bottom including northern Mirs Bay, Port Shelter and coastal Southern Waters (Fig. 4). This species is also abundant in Tolo Harbour, an area known for its summer hypoxia and eutrophication (Hu et al., 2001; Sin & Chau, 1992). These results are consistent with previous studies indicating that *S. impressa* is dominant in low salinity, nutrient-rich and turbid estuaries (Irizuki et al., 2005; Tanaka et al., 2011), but we did not see a significant relation with turbidity (Tables 2 and 3). *S. impressa* is known as a euryhaline species widely distributed throughout the East and South China Seas [abundant in water depths of <20 m; Whatley and Zhao (1988a)], and the Indo-Pacific (Fig. 7).

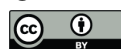

224 Relative abundance of *N. delicata* (=Neomonoceratina crispata; see Hou &  
225 Gou, 2007) is significantly correlated with Zn (positive), salinity (positive) and  
226 turbidity (positive) (Tables 2 and 3). *N. delicata* is a nearshore species, abundant at  
227 depths less than 30 m, at relatively high salinities (>30; Zhao and Wang, 1988). *N.*  
228 *delicata* prefers higher salinity waters in Hong Kong (Figs. 2 and 4; Tables 2 and 3),  
229 and is likely tolerant to human-induced environmental stress such as pollution and  
230 eutrophication, in view of its positive correlation with Zn and turbidity. This species  
231 is widely known from nearshore and estuary environments in the East and South  
232 China Seas, and the Indo-Pacific (Fig. 7).

233 Relative abundance of *B. bisanensis* s.l. was significantly correlated with  
234 water depth (negative) (Tables 2 and 3) and this species prefers shallower  
235 environments (Figs. 2 and 4). In Chinese and Japanese coastal areas, *B. bisanensis* s.l.  
236 is abundant in brackish water (salinity: 20–30) at depths less than 10 m (Ikeya &  
237 Shiozaki, 1993; Irizuki et al., 2006; Zhao et al., 1986). Our results confirm its  
238 preference for shallow depths. *Bicornucythere bisanensis* is tolerant of anthropogenic  
239 impacts, especially eutrophication and the resulting bottom water hypoxia in Japan  
240 (Irizuki et al., 2003; Yasuhara et al., 2003; Yasuhara et al., 2012a). We did not see a  
241 significant relation between relative abundance and metal concentration, productivity,  
242 or dissolved oxygen. Possibly, the more dominant presence of *S. impressa* and *N.*  
243 *delicata*, that are neither dominant or distributed throughout most of Japan, could  
244 explain this difference. These species may have a higher tolerance than *B. bisanensis*  
245 s.l. Another explanation may be that different morphotypes have different ecological  
246 preferences (Abe, 1988), and only Form A is known to be tolerant to eutrophication  
247 and bottom-water oxygen depletion (Irizuki et al., 2011; Irizuki et al., 2015a;  
248 Yasuhara & Yamazaki, 2005; Yasuhara et al., 2007). Form A is less abundant in



249 Hong Kong, and due to the difficulty of identification of juveniles, we did not divide  
250 *B. bisanensis* into morphotypes. *B. bisanensis* s.l. is widely distributed throughout  
251 marginal marine environments around Japan and Russia, and the East and South  
252 China Seas (Fig. 7).

253 Relative abundance of *P. bradyi* was highly correlated with salinity (positive),  
254 water depth (negative) and Pb (negative) (Tables 2 and 3). This indicates the species  
255 prefers relatively shallow environments with high salinity (Figs. 2 and 4). In the Pearl  
256 River Delta and shallow South China Sea (Fig. 7), *P. bradyi* is dominant along the  
257 inner continental shelf at water depths <100 m (mostly common between 10–50 m),  
258 and at salinities from 30–40 (Li, 1985; Zhao & Wang, 1990; Zhao et al., 1986).  
259 *Pistocythereis bradyi* is a typical middle muddy bay species in Japan (Irizuki et al.,  
260 2006; Yasuhara & Irizuki, 2001; Yasuhara & Seto, 2006), and known from open bays  
261 such as Gamagyang Bay in Korea (Abe, 1988) and Malacca Strait (Whatley & Zhao,  
262 1988b). In these studies, *P. bradyi* prefers relatively high salinity and deeper water in  
263 the inner continental shelf (Tables 2 and 3). Our data agree as to the preference for  
264 high salinity, but we find shallower depths, inconsistent with the literature. Maybe  
265 salinity is more important than depth, but the restricted depth range of our sites ( $\leq 35$   
266 m) may also be a reason for this inconsistency. Our results indicate that *P. bradyi* is  
267 sensitive to metal pollution. This species is widely distributed throughout the  
268 marginally marine environments of Japan, the East and South China Seas, and the  
269 Indo-Pacific (Fig. 7).

270 Relative abundance of *N. bicarinata* was correlated with productivity  
271 (negative) (Tables 2 and 3). This is a typical middle bay species in Japan (Irizuki et al.,  
272 2006), abundant on muddy substrates at water depths > 10 m (Yasuhara & Seto, 2006;  
273 Yasuhara et al., 2005). We found *N. bicarinata* to be sensitive to eutrophication,



274 preferring lower productivity (Figures 2, 4). This species is known from marginal  
275 marine environments around Japan and the East and South China Seas (Fig. 7).

276 Relative abundance of *S. quadriaculeata* is correlated to productivity (positive)  
277 and turbidity (negative). This is a typical inner muddy bay species in Japan (Irizuki et  
278 al., 2006), which prefers silty substrates in brackish waters, at salinities from 20–30,  
279 and water depths of 2–7 m (Ikeya and Shiozaki, 1993). This study shows a preference  
280 for waters with higher productivity but relatively low turbidity (Tables 2 and 3), so  
281 that the species is abundant in Tolo Harbour (higher productivity, lower turbidity) but  
282 not in Deep Bay (higher turbidity) (Figs. 2 and 4). *Spinileberis quadriaculeata* is not  
283 tolerant to seasonal anoxia or oxygen depletion (0–1 mg/L) in Uranouchi Bay, Japan  
284 (Irizuki et al., 2008), but we do not find a significant correlation with dissolved  
285 oxygen content, probably due to the relatively high bottom-water oxygen content  
286 (2.96–6.84 mg/L) in Hong Kong (Fig. 2; Supplement B). *S. quadriaculeata* is widely  
287 distributed in marginally marine environments around Japan and Russia, and the East  
288 and South China Seas (Fig. 7).

289 Relative abundance of *K. kloempritsensis* was correlated only with water depth  
290 (positive) (Fig. 4; Tables 2 and 3). *Keijella kloempritsensis* is widely known from the  
291 tropical Indo-Pacific region, and abundant along the inner continental-shelf of the  
292 South and East China Seas (Fig. 7), at water depths range from 20–50 m and salinity  
293 is close to normal marine (Zhao & Wang, 1990). Our modelling results are consistent  
294 with this showing a preference for relatively deeper water in this study (Tables 2 and  
295 3). Thus, this species is probably useful for reconstructing past sea-level changes in  
296 the broad tropical and subtropical Indo-Pacific and northwestern Pacific regions.

297 Relative abundance of *L. malayensis* was correlated with dissolved oxygen  
298 (negative) and mud content (negative) (Tables 2 and 3). *Loxoconcha malayensis* is a





299 typical tropical species known from the Indo-Pacific and the South China Sea (Fig. 7).

300 We did not find a correlation to temperature, likely due to the small range of variation

301 of bottom water temperatures in Hong Kong (winter temperature: 19.10–21.49°C).

302 This species prefers coarse sediments and is resistant to low oxygen content (Table 2

303 and 3), as seen by its abundance in Victoria Harbour (Figs. 2 and 4).

304 Relative abundance of *N. elongata* was correlated only with turbidity (positive)

305 (Tables 2 and 3). *Neosinocythere elongata* occurs along the entire coast of China (Fig.

306 7) in marginal marine, especially estuarine, environments shallower than 20 m (Dong

307 et al., 2012; Hou & Gou, 2007; Liu et al., 2013; Liu et al., 2017; Zhao & Whatley,

308 1993) and is known from the Indo-Pacific region (Fig. 7). Our modeling results and

309 previous studies indicate consistently that *N. elongata* prefers shallow, turbid waters

310 like Deep Bay and the Pearl River Estuary (Figs 2 and 6).

311 Relative abundance of *S. roesmani* was correlated with Pb (negative) (Tables

312 2 and 3), thus it was sensitive to metal pollution (but note the significant

313 autocorrelation with the modeling result of this genus) and absent in areas with high

314 metal concentrations, e.g., Tolo and Victoria Harbours (Fig. 3, 6). This species occurs

315 in the East and South China Seas and the Indo-Pacific region (Dewi, 1997; Mostafawi,

316 1992; Whatley & Zhao, 1988a) (Fig. 7).

317 Relative abundance of *P. japonica* was correlated with water depth (positive)

318 (Tables 2 and 3). This species is known from relatively deeper waters (>40 m) in the

319 East China Sea (Ishizaki, 1981; Wang et al., 1988). At our sites, it has its greatest

320 abundance at the deeper southern sites (Fig. 5). *Phlyctocythere japonica* is distributed

321 around Japan (Yasuhara et al., 2002) and the East and South China Seas (Fig. 7).

322 Relative abundance of *A. goujoni* was correlated with salinity (positive)

323 (Tables 2 and 3). It occurs not only in Mirs Bay where the salinity is higher, but also



324 in Deep Bay and North Western Waters where the salinity is lower than in other areas  
325 (Figs 2 and 6). The Deep Bay and North Western Waters are shallow and have  
326 relatively low oxygen content. The modeling result of this species shows a marginally  
327 insignificant but negative relationship to oxygen content and water depth with  
328 moderately high relative importance (Table 3). We explain this inconsistency by  
329 considering their preference of higher salinity and shallow water depths, and also their  
330 resistance to low oxygen conditions, but further research is needed to know their  
331 autoecology with better confidence. *Alocopocythere goujoni* is known from the South  
332 China Sea and the Indo-Pacific (Fig. 7).

333 Relative abundance of *H. orientalis* was correlated with water depth (positive)  
334 (Tables 2 and 3; but note the significant autocorrelation with the modeling result of  
335 this genus), and it is more abundant in deeper waters including southern Mirs Bay  
336 (Fig. 5). *Hemikrithe orientalis* is known from depths of 20–50 m in the South China  
337 Sea (Zhao & Wang, 1988a), and reported from tropical Indo-Pacific marginal marine  
338 environments (Fig. 7). Our regression modeling consistently shows a positive  
339 relationship between the relative abundance and winter temperatures, with moderately  
340 high relative importance, although the correlation is marginally insignificant (Table 3).

341 Relative abundance of *L. epeterseni* was correlated with water depth (positive)  
342 and turbidity (negative) (Tables 2 and 3), and its occurs in the southern and eastern,  
343 deeper and less turbid parts of Hong Kong waters, but the trend is not very clear (Figs  
344 2 and 6). This species is also known from the deeper parts of Osaka Bay, Japan  
345 (Yasuhara & Irizuki, 2001) and from marginal marine environments around Japan  
346 (Ishizaki, 1968), the East China Sea (Yang et al., 1982), and the South China Sea  
347 (Cao, 1998) (Fig. 7). This species is reported as *Loxoconcha modesta* in Hou & Gou  
348 (2007), and also has been misidentified as *Loxoconcha viva* and *Loxoconcha sinensis*



349 (Hou & Gou, 2007). Ishizaki (1968) described *Loxoconcha laeta* and *Loxoconcha*  
350 *modesta* but in our opinion, these are the females and males of the same species.  
351 Ishizaki (1981) gave the new species names *Loxoconcha epeterseni* and *Loxoconcha*  
352 *tosamodesta* for *Loxoconcha laeta* and *Loxoconcha modesta*, respectively, because  
353 these names were junior homonyms. Since *Loxoconcha laeta* (= *epeterseni*) appears  
354 earlier than *Loxoconcha modesta* (= *tosamodesta*) in the original description (Ishizaki,  
355 1968), we use the name *Loxoconcha epeterseni* for this species.

356 Relative abundance of *H. reticulata* was correlated with Pb (negative) and  
357 water depth (negative) (Tables 2 and 3). This species is abundant in Tolo Harbour  
358 and the inner part of Mirs Bay (Fig. 5), at shallow depths, and is also consistently  
359 found in very shallow waters from the Indo-Pacific (Zhao & Whatley, 1989). Their  
360 metal-pollution sensitivity is contradictory because they occur in Tolo and Victoria  
361 Harbours, both polluted regions of Hong Kong, and further research is needed to  
362 better understand these results (Figs 2 and 6). *Hemicytheridea reticulata* is distributed  
363 in the East China Sea (Gu et al., 2017), the South China Sea, and the Indo-Pacific (Fig.  
364 7).

365 The relative abundance of the cosmopolitan *Neonesidea* spp. was correlated  
366 with dissolved oxygen (positive), as expected for a phytal species (Smith & Kamiya,  
367 2002; Yamada, 2007) (Table 2 and 3; Fig 6).

368 The relative abundance of the cosmopolitan *Propontocypris* spp. was strongly  
369 correlated with productivity (negative) (Tables 2 and 3). This negative correlation  
370 with productivity (but note the significant autocorrelation with the modeling result of  
371 this genus) indicates that the genus prefers less eutrophic waters (Fig. 6).  
372 *Propontocypris* is a good swimmer (Maddocks, 1969), and thus may have an  
373 advantage in obtaining food in relatively food-limited environments.



374 The relative abundance of the cosmopolitan phytal (Irizuki et al., 2008; Sato &  
375 Kamiya, 2007; Yasuhara et al., 2002) *Xestoleberis* spp. was correlated with turbidity  
376 (negative), mud content (negative), and dissolved oxygen (positive) (Table 2 and 3;  
377 Fig. 6). The taxon's habitats including clear water, coarse sediment, and high oxygen  
378 content are reflected in our modeling.

379

### 380 **Summary**

381 Benthic ostracods from Hong Kong marginal marine waters studied here include  
382 widespread (i.e., distributed throughout the northwestern Pacific – Indo-Pacific region:  
383 one species), temperate (i.e., distributed from the South China Sea to Japan and  
384 Russia: five species), subtropical (i.e., distributed from the Indo-Pacific to the East  
385 China Sea: six species), and tropical (i.e., distributed in the Indo-Pacific and South  
386 China Sea: three species) species and three globally distributed genera (Fig. 7). We  
387 provide a robust baseline of autoecology for these common ostracod taxa based on  
388 rigorous statistical modeling using comprehensive environmental data. We  
389 established reliable indicator forms for water depth, mud content, salinity, turbidity,  
390 dissolved oxygen, heavy metal pollution (Pb and Zn) and eutrophication (chlorophyll-  
391 a) (Table 5). Thus our results are applicable for future ostracod-based  
392 paleoenvironmental studies in a wide range of localities from the tropics to the  
393 extratropics, and from the Indian Ocean to the northwestern Pacific. We established  
394 pollution and eutrophication indicator species in tropical environments for the first  
395 time. Anthropocene paleoenvironmental and paleoecological studies in the tropics are  
396 urgently needed because (1) the tropics are seriously under-studied (Wilkinson et al.,  
397 2014; Yasuhara et al., 2012a), (2) tropical environments and ecosystems are  
398 vulnerable and sensitive to human influences (Jackson et al., 2001; Pandolfi et al.,



2003), and (3) Indo-Pacific tropical environments have been seriously degraded by the human activity of rapidly developing countries (Bellwood et al., 2004; Jackson, 2008; Knowlton & Jackson, 2008). Our results provide useful and reliable tools for tropical Anthropocene research in the broad Indo-Pacific region.

403

#### 404 **Acknowledgement**

We thank the Environmental Protection Department of Hong Kong, especially K. Yung, for support; L. Wong, C. Law, M. Lo, and the staff of the Electronic Microscope Unit of the University of Hong Kong for their technical support; B. Lin, S. Wang, R. Mak and V. Wang for helping sampling; P. Frenzel, M. Warne, E. Thomas, O. Friedrich for valuable comments on an early version of the manuscript. The data used are listed in the tables and supplements. The work described in this paper was partially supported by the Environment and Conservation Fund of Hong Kong (project code: 19/2012), the General Research Fund of the Research Grants Council of Hong Kong (project code: HKU 17303115), the Early Career Scheme of the Research Grants Council of Hong Kong (project code: HKU 709413P), and the Seed Funding Programme for Basic Research of the University of Hong Kong (project codes: 201111159140, 201611159053) (to MY).

417

418

**References:** Irizuki et al. (2006); Zhao and Wang (1988a, 1988b, 1990); Zhao and Whatley (1993); Zhou et al. (2015)(Dong et al., 2012; Hong et al., 2017; Hou & Gou, 2007; Irizuki et al., 2009; Jie et al., 2013; Li, 1985; Tanaka et al., 2009; Wang & Zhao, 1985; Wang & Zhang, 1987; Zhao, 1984; Zhao & Wang, 1988b; Zhao & Whatley,

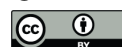

- 1989; Zhou et al., 2015)(Noraswana et al., 2014)(Whatley & Zhao, 1988b)(Tanaka et al., 2011)(Zhao & Whatley, 1993)(Pugliese et al., 2006)(Hussain et al., 2004; Nishath et al., 2017)(Al Jumaily & Al-Sheikhly, 1999; Hussain & Mohan, 2000, 2001; Hussain et al., 2010; Iwatani et al., 2014)
- Abe, K.: Speciation Completed? In *Keijella bisanensis* Species Group, Developments in Palaeontology and Stratigraphy, 11, 919–925, 1988.
- Al Jumaily, W. A. K. and Al-Sheikhly, S. S.: Palaeozoogeography of Shallow Marine Ostracoda from Holocene Sediments-Southern Iraq, Qatar University Science Journal, 18, 215–230, 1999.
- Alberti, M., Hethke, M., Fürsich, F. T., and Liu, C.: Macro-versus microfauna: resolution potential of bivalves, gastropods, foraminifera and ostracods in reconstructing the Holocene palaeoenvironmental evolution of the Pearl River delta, China, Palaeobio. Palaeoenv., 93(3), 327–353, 2013.
- Anderson, D. R. and Burnham, K. P.: Avoiding pitfalls when using information-theoretic methods, J. Wildlife Manage., 66, 912–918, 2002.
- Anderson, D. R., Burnham, K. P., and Thompson, W. L.: Null hypothesis testing: problems, prevalence, and an alternative, J. Wildlife Manage., 64, 912–923, 2000.
- Bartoń, K.: MuMIn: Multi-model inference, R package version 1.9.13., The Comprehensive R Archive Network (CRAN), available at <https://CRAN.R-project.org/package=MuMIn> (last access: 3 September 2018), 2013
- Bellwood, D. R., Hughes, T. P., Folke, C., and Nyström, M.: Confronting the coral reef crisis, Nature, 429(6994), 827, 2004.

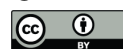

- 446 Bivand, R. and Piras, G.: Comparing implementations of estimation methods for  
447 spatial econometrics, *J. Stat. Softw.*, 63, 1–36, 2015.
- 448 Blackmore, G.: An overview of trace metal pollution in the coastal waters of Hong  
449 Kong, *Sci. Total Environ.*, 214(1), 21–48, 1998.
- 450 Boomer, I. and Eisenhauer, G.: Ostracod faunas as palaeoenvironmental indicators in  
451 marginal marine environments, in: *The Ostracoda: applications in Quaternary*  
452 *research*, edited by: Holmes, J. A. and Chivas, A.R., vol. 131, American  
453 Geophysical Union, Washington DC, 135–149, 2002.
- 454 Burnham, K. P. and Anderson, D. R.: Model selection and multi-model inference: a  
455 practical information-theoretic approach, Springer, New York, 2002.
- 456 Cao, M.: Ostracods from Quaternary Hang Hau Formation, Lei Yue Mun, Hong  
457 Kong, in: *Fossils and strata of Hong Kong (Lower Volume)*, edited by: Li, Z.,  
458 Chen, J., and He, G., Science Press, Beijing, 171–183, 1998 (in Chinese).
- 459 Cronin, T. M.: Ostracods and sea level, in: *Handbook of Sea-Level Research*, edited  
460 by: I. Shennan, Long, A. J., and Horton, B. P, John Wiley & Sons, Ltd, 249–  
461 257, 2015.
- 462 Cronin, T. M. and Vann, C. D.: The sedimentary record of climatic and anthropogenic  
463 influence on the Patuxent estuary and Chesapeake Bay ecosystems, *Estuaries*,  
464 26(2), 196–209, 2003.
- 465 Dewi, K. T.: Ostracoda from the Java Sea, west of Bawean Island, Indonesia, *Marine*  
466 *Geological Institute Special Publication*, 4, 1–115, 1997.



- 467 Dong, Y., Liu, C., Chen, M., Qu, R., Wu, T., and Zhao, F.: Late Quaternary  
468 Paleontology and environmental changes in Da'Ao plain middle Pearl River  
469 Delta, Quaternary Sciences, 32(6), 1183–1198, 2012 (in Chinese with English  
470 Abstract).
- 471 Environmental Protection Department, H. K.: Marine Water Quality in Hong Kong  
472 2011, available at [http://wqrc.epd.gov.hk/pdf/water-quality/annual-](http://wqrc.epd.gov.hk/pdf/water-quality/annual-report/Marine2011EN.pdf)  
473 [report/Marine2011EN.pdf](http://wqrc.epd.gov.hk/pdf/water-quality/annual-report/Marine2011EN.pdf) (last access: 3 September 2018), 2011.
- 474 Fauzielly, L., Irizuki, T., and Sampei, Y.: Vertical changes of recent ostracode  
475 assemblages and environment in the inner part of Jakarta Bay, Indonesia,  
476 Journal of coastal development, 16(1), 11–24, 2013.
- 477 Frenzel, P. and Boomer, I.: The use of ostracods from marginal marine, brackish  
478 waters as bioindicators of modern and Quaternary environmental change,  
479 Palaeogeogr. Palaeoclimatol., 225(1), 68–92, 2005.
- 480 Gu, Y., Liu, H., and Qin, Y.: Postglacial transgression maximum documented by the  
481 core sediments of Xixi Wetland, East China, Quatern. Int., 436, 84–95, 2017.
- 482 Hazel, J. E.: Determining late Neogene and Quaternary palaeoclimates and  
483 palaeotemperature regimes using ostracods, in: Ostracoda in the Earth  
484 Sciences, edited by: De Deckker, P., Colin, J.P., and Peypouquet, J.P.,  
485 Elsevier, Amsterdam, 89–103, 1988.
- 486 Hendrickx, J., Pelzer, B., Te Grotenhuis, M., and Lammers, J.: Collinearity involving  
487 ordered and unordered categorical variable, RC33 conference, Amsterdam,  
488 The Netherlands, 17–20 August 2004, , 2004.





- 489 Hodgkiss, I. and Yim, W.: A case study of Tolo Harbour, Hong Kong, *Eutrophic*  
490 *Shallow Estuaries and Lagoons*, 4, 41–57, 1995.
- 491 Hoffman, J. I. E.: *Biostatistics for Medical and Biomedical Practitioners*, Academic  
492 Press, Tiburon, California, USA, 2015.
- 493 Hong, Y., Yasuhara, M., Iwatani, H., Seto, K., Yokoyama, Y., Yoshioka, K., and  
494 Mamo, B.: Freshwater reservoir construction by damming a marine inlet in  
495 Hong Kong: Paleocological evidence of local community change, *Mar.*  
496 *Micropaleontol.*, 132, 53–59, 2017.
- 497 Horne, D., Holmes, J., Viehberg, F., and Rodriguez-Lazaro, J.: Ostracoda as proxies  
498 for Quaternary climate change, in: *Developments in Quaternary Science*,  
499 edited by: J. M. Jaap, van der Meer, vol. 17, Elsevier, Amsterdam, 1–337,  
500 2012.
- 501 Hou, Y. T. and Gou, Y. X.: *Ostracod Fossils of China, Vol. II, Cytheracea and*  
502 *Cytherellidae*, Science Press, Beijing, 2007 (in Chinese).
- 503 Hu, J., Zhang, G., Li, K., Peng, P. a., and Chivas, A. R.: Increased eutrophication  
504 offshore Hong Kong, China during the past 75 years: evidence from high-  
505 resolution sedimentary records, *Mar. Chem.*, 110(1), 7–17, 2008.
- 506 Hu, W. F., Lo, W., Chua, H., Sin, S. N., and Yu, P. H. F.: Nutrient release and  
507 sediment oxygen demand in a eutrophic land-locked embayment in Hong  
508 Kong, *Environ. Int.*, 26(5), 369–375, 2001.
- 509 Hussain, S. M. and Mohan, S. P.: Recent Ostracoda from Adyar River Estuary,  
510 Chennai, Tamil Nadu, *J. Palaeontol. Soc. Ind.*, 45(2), 25–32, 2000.



- 511 Hussain, S. M. and Mohan, S. P.: Distribution of recent benthic Ostracoda in Adyar  
512 river estuary, east coast of India, Indian J. Mar. Sci., 30, 53–56, 2001.
- 513 Hussain, S. M., Mohan, S. P., and Jonathan, M. P.: Ostracoda as an aid in identifying  
514 2004 tsunami sediments: a report from SE coast of India, Nat. Hazards., 55(2),  
515 513–522, 2010.
- 516 Hussain, S. M., Ravi, G., Mohan, S. P., and Rao, N. R.: Recent Benthic Ostracoda  
517 from the inner shelf off Chennai, south east coast of India-implication of  
518 microenvironments, Env. Micropal. Microbiol. Microbenth., 1, 105–121,  
519 2004.
- 520 Ikeya, N. and Shiozaki, M.: Characteristics of the inner bay ostracodes around the  
521 Japanese islands: The use of ostracodes to reconstruct paleoenvironments,  
522 Memoirs of the Geological Society of Japan, 39, 15–32, 1993 (in Japanese  
523 with English abstract).
- 524 Irizuki, T., Matsubara, T., and Matsumoto, H.: Middle Pleistocene Ostracoda from the  
525 Takatsukayama Member of the Meimi Formation, Hyogo Prefecture, western  
526 Japan- significance of the occurrence of *Sinocytheridea impressa*, The  
527 Palaeontological Society of Japan, 9(1), 37–54, 2005.
- 528 Irizuki, T., Takata, H., and Ishida, K.: Recent Ostracoda from Urauchi Bay,  
529 Kamikoshiki-jima Island, Kagoshima Prefecture, southwestern Japan, Laguna,  
530 13, 13–28, 2006.
- 531 Irizuki, T., Seto, K., and Nomura, R.: The impact of fish farming and bank  
532 construction on Ostracoda in Uranouchi Bay on the Pacific coast of southwest



- 533 Japan-Faunal changes between 1954 and 2002/2005, *Palaeontological*
- 534 *Research*, 12(3), 283–302, 2008.
- 535 Irizuki, T., Nakamura, Y., Takayasu, K., and Sakai, S.: Faunal changes of Ostracoda
- 536 (Crustacea) in Lake Nakaumi, southwestern Japan, during the last 40 years,
- 537 *Geoscience Report Shimane University*, 22, 149–160, 2003.
- 538 Irizuki, T., Taru, H., Taguchi, K., and Matsushima, Y.: Paleobiogeographical
- 539 implications of inner bay Ostracoda during the Late Pleistocene
- 540 Shimosueyoshi transgression, central Japan, with significance of its migration
- 541 and disappearance in eastern Asia, *Palaeogeogr. Palaeoclimatol.*, 271(3), 316–328,
- 542 2009.
- 543 Irizuki, T., Takimoto, A., Sako, M., Nomura, R., Kakuno, K., Wanishi, A., and
- 544 Kawano, S.: The influences of various anthropogenic sources of deterioration
- 545 on meiobenthos (Ostracoda) over the last 100years in Suo-Nada in the Seto
- 546 Inland Sea, southwest Japan, *Mar. Pollut. Bull.*, 62(10), 2030–2041, 2011.
- 547 Irizuki, T., Ito, H., Sako, M., Yoshioka, K., Kawano, S., Nomura, R., and Tanaka, Y.:
- 548 Anthropogenic impacts on meiobenthic Ostracoda (Crustacea) in the
- 549 moderately polluted Kasado Bay, Seto Inland Sea, Japan, over the past 70
- 550 years, *Mar. Pollut. Bull.*, 91(1), 149–159, 2015a.
- 551 Irizuki, T., Kobe, M., Ohkushi, K., Kawahata, H., and Kimoto, K.: Centennial-to
- 552 millennial-scale change of Holocene shallow marine environments recorded in
- 553 ostracode fauna, northeast Japan, *Quaternary Res.*, 84(3), 467–480, 2015b.
- 554 Ishizaki, K.: Ostracodes from Uranouchi Bay, Kochi Prefecture, Japan, *Science*
- 555 *reports of the Tohoku University, Sendai, Second Series(Geology)*, 40, 1–45.



- 556 Ishizaki, K.: Ostracoda from the East China Sea, The science reports of the Tohoku  
557 University, Second series, Geology, 51(1/2), 37-A39, 1981.
- 558 Iwatani, H., Young, S. M., Irizuki, T., Sampei, Y., and Ishiga, H.: Spatial variations in  
559 recent ostracode assemblages and bottom environments in Trincomalee Bay,  
560 northeast coast of Sri Lanka, Micropaleontology, 509–518, 2014.
- 561 Jackson, J. B. C.: Ecological extinction and evolution in the brave new ocean, PNAS,  
562 2008.
- 563 Jackson, J. B. C., Kirby, M. X., Berger, W. H., Bjorndal, K. A., Botsford, L. W.,  
564 Bourque, B. J., Bradbury, R. H., Cooke, R., Erlandson, J., and Estes, J. A.:  
565 Historical overfishing and the recent collapse of coastal ecosystems, Science,  
566 293(5530), 629–637, 2001.
- 567 Jie, L., Chunlian, L., Liangwen, J., Tingting, Y., and Suqing, Z. J., Yin.:  
568 Foraminiferal and ostracod distribution in surface sediments from Huangmao  
569 Bay of Pearl River Estuary and its influencing factors, Journal of  
570 Palaeogeography, 15(3), 413–422, 2013 (in Chinese with English Abstract).
- 571 Knowlton, N. and Jackson, J. B. C.: Shifting baselines, local impacts, and global  
572 change on coral reefs, PLoS biology, 6(2), e54, 2008.
- 573 Legendre, P. and Legendre, L.: Numerical ecology: second English edition (Vol. 20),  
574 Elsevier, Amsterdam, The Netherlands, 1998.
- 575 Li, S.: Distribution of the ostracod thanatocoenses in the Pearl River Mouth area,  
576 Journal of Tropical Oceanography, 4, 43–54, 1985.



- 577    Liu, C., Franz T., F., Wu, J., Dong, Y., Yang, T., Yin, J., Wang, Y., and Liu, M.: Late  
578            Quaternary palaeoenvironmental changes documented by microfaunas and  
579            shell stable isotopes in the southern Pearl River Delta plain, South China,  
580            *Journal of Palaeogeography*, 2(4), 344–361, 2013.
- 581    Liu, J., Zhang, X., Mei, X., Zhao, Q., Guo, X., Zhao, W., Liu, J., Saito, Y., Wu, Z.,  
582            and Li, J.: The sedimentary succession of the last~ 3.50 Myr in the western  
583            south Yellow Sea: Paleoenvironmental and tectonic implications, *Mar. Geol.*,  
584            399, 47–65, 2017.
- 585    Maddocks, R. F.: Recent ostracodes of the Family Pontocyprididae chiefly from the  
586            Indian Ocean, *Smithsonian Contributions to Zoology*, 7, 1–56, 1969.
- 587    Morton, B.: The subsidiary impacts of dredging (and trawling) on a subtidal benthic  
588            molluscan community in the southern waters of Hong Kong, *Mar. Pollut.*  
589            *Bull.*, 32(10), 701–710, 1996.
- 590    Morton, B. and Wu, S.: The hydrology of the coastal waters of Hong Kong, *Environ.*  
591            *Res.*, 10(3), 319–347, 1975.
- 592    Morton, B. and Blackmore, G.: South China Sea, *Mar. Pollut. Bull.*, 42(12), 1236–  
593            1263, 2001.
- 594    Mostafawi, N.: Recent ostracods from the central Sunda Shelf, between the Malay  
595            Peninsula and Borneo, *Senckenbergiana Lethaea*, 72, 129–168, 1992.
- 596    Nishath, N. M., Hussain, S. M., Neelavnnan, K., Thejasino, S., Saalim, S., and  
597            Rajkumar, A.: Ostracod biodiversity from shelf to slope oceanic conditions,  
598            off central Bay of Bengal, India, *Palaeogeogr. Palaeocl.*, 483, 70–82, 2017.



- 599 Noraswana, N. F., Ramlan, O., and Norashikin, S.: Distribution of recent ostracoda in  
600 offshore Sediment of selected stations in the Sulu Sea, Sabah, Malaysian  
601 Applied Biology, 43(2), 49–57, 2014.
- 602 Owen, R. B. and Sandhu, N.: Heavy Metal Accumulation and Anthropogenic Impacts  
603 on Tolo Harbour, Hong Kong, Mar. Pollut. Bull., 40(2), 174–180, 2000.
- 604 Ozawa, H., Kamiya, T., Itoh, H., and Tsukawaki, S.: Water temperature, salinity  
605 ranges and ecological significance of the three families of Recent cold-water  
606 ostracods in and around the Japan Sea, Paleontol. Res., 8(1), 11–28, 2004.
- 607 Pandolfi, J. M., Bradbury, R. H., Sala, E., Hughes, T. P., Bjorndal, K. A., Cooke, R.  
608 G., McArdle, D., McClenachan, L., Newman, M. J. H., and Paredes, G.:  
609 Global trajectories of the long-term decline of coral reef ecosystems, Science,  
610 301(5635), 955–958, 2003.
- 611 Pugliese, N., Maria Eugenia, M., Francesco, S., and Chaimanee, N.: Environmental  
612 monitoring through the shallow marine ostracods of Phetchaburi area (NW  
613 Gulf of Thailand), in: Proceedings of the Second and Third Italian Meetings  
614 on Environmental Micropaleontology, Urbino, Italy, 10–12 June 2003 and 8–9  
615 June 2004, vol. 11, 85–90,, 2006.
- 616 R Core Team.: R: A language and environment for statistical computing [Computer  
617 software 3.2.4], available at <http://www.R-project.org/> (last access: 3  
618 September 2018), 2016.
- 619 Ruiz, F., Abad, M., Bodergat, A. M., Carbonel, P., Rodríguez-Lázaro, J., and  
620 Yasuhara, M.: Marine and brackish-water ostracods as sentinels of  
621 anthropogenic impacts, Earth-Sci. Rev., 72, 89–111, 2005.

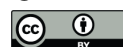

- 622 Sato, T. and Kamiya, T.: Taxonomy and geographical distribution of recent  
623 *Xestoleberis* species (Cytheroidea, Ostracoda, Crustacea) from Japan,  
624 Paleontol. Res., 11(2), 183–227, 2007.
- 625 Schornikov, E. I., Zenina, M. A., and Ivanova, E. V.: Ostracods as indicators of the  
626 aquatic environmental conditions on the northeastern Black Sea shelf over the  
627 past 70 years, Russ. J. Mar. Biol., 40(6), 455–464, 2014.
- 628 Shin, P. K. S.: Changes in benthic infaunal communities in Tolo Harbour: will the  
629 trend continue, Perspectives on Marine Environment Change in Hong Kong  
630 and Southern China, 2001, 579–592, 1977.
- 631 Sin, Y. S. and Chau, K. W.: Eutrophication studies on Tolo Harbour, Hong Kong,  
632 Water Sci. Technol., 26(9-11), 2551–2554, 1992.
- 633 Smith, R. J. and Kamiya, T.: The ontogeny of *Neonesidea oligodentata* (Bairdioidea,  
634 Ostracoda, Crustacea), Hydrobiologia, 489(1-3), 245–275, 2002.
- 635 Stepanova, A., Taldenkova, E., and Bauch, H. A.: Recent Ostracoda from the Laptev  
636 Sea (Arctic Siberia): species assemblages and some environmental  
637 relationships, Mar. Micropaleontol., 48(1), 23–48, 2003.
- 638 Tanaka, G., Komatsu, T., and Phong, N. D.: Recent ostracod assemblages from the  
639 northeastern coast of Vietnam and the biogeographical significance of the  
640 euryhaline species, Micropaleontology, 55, 365–382, 2009.
- 641 Tanaka, G., Komatsu, T., Saito, Y., Nguyen, D. P., and Vu, Q. L.: Temporal changes  
642 in ostracod assemblages during the past 10,000 years associated with the



- 643 evolution of the Red River delta system, northeastern Vietnam, Mar.  
644 Micropaleontol., 81(3), 77–87, 2011.
- 645 Tanner, P. A., Leong, L. S., and Pan, S. M.: Contamination of heavy metals in marine  
646 sediment cores from Victoria Harbour, Hong Kong, Mar. Pollut. Bull., 40(9),  
647 769–779, 2000.
- 648 Wang, P. and Zhao, Q.: Ostracod distribution in bottom sediments of the East China  
649 Sea, in: Marine micropaleontology of China, edited by: Wang, et al., China  
650 Ocean Press, Beijing, 70–92, 1985(in Chinese),.
- 651 Wang, P., Zhang, J., Zhao, Q., Min, Q., Bian, Y., Zheng, L., Cheng, X., and Chen, R.:  
652 Foraminifera and Ostracoda in bottom sediments of the East China Sea, Ocean  
653 Press, Beijing, 1988 (in Chinese with English abstract).
- 654 Wang, Q. and Zhang, L.: Holocene ostracod fauna and paleoenvironment in the sea  
655 region around Hong Kong, Acta Oceanol. Sin., 6, 281–291, 1987.
- 656 Whatley, R. and Zhao, Q.: A revision of Brady’s 1869 study of the Ostracoda of Hong  
657 Kong, J. Micropalaeontol., 7(1), 21–29, 1988a.
- 658 Whatley, R. and Zhao, Q.: Recent Ostracoda of the Malacca Straits, Part II, Revista  
659 Española de Micropaleontología, 20, 5–37, 1988b.
- 660 Wilkinson, I. P., Poirier, C., Head, M. J., Sayer, C. D., and Tibby, J.: Microbiotic  
661 signatures of the Anthropocene in marginal marine and freshwater  
662 palaeoenvironments, Geological Society, London, Special Publications,  
663 395(1), 185–219, 2014.





- 664 Woodroffe, C. D., Nicholls, R. J., Saito, Y., Chen, Z., and Goodbred, S. L.:  
665 Landscape variability and the response of Asian megadeltas to environmental  
666 change, in: Global change and integrated coastal management: the Asia-  
667 Pacific region, edited by: N. Harvey, vol. 10, 277–314, Springer, Berlin, 2006.
- 668 Yamada, S.: Ultrastructure of the carapace margin in the Ostracoda (Arthropoda:  
669 Crustacea), *Hydrobiologia*, 585(1), 201–211, 2007.
- 670 Yang, H., Chen, T., Hou, Y., Ho, J., Zhou, Q., and Tian, M.: Cretaceous–Quaternary  
671 Ostracoda Fauna from Jiangsu, Geological Publishing House, Peking, 386,  
672 1982.
- 673 Yasuhara, M. and Irizuki, T.: Recent Ostracoda from the northeastern part of Osaka  
674 Bay, southwestern Japan, *Journal of Geosciences Osaka City University*, 44,  
675 57–95, 2001.
- 676 Yasuhara, M. and Yamazaki, H.: The impact of 150 years of anthropogenic pollution  
677 on the shallow marine ostracode fauna, Osaka Bay, Japan, *Mar.*  
678 *Micropaleontol.*, 55(1), 63–74, 2005.
- 679 Yasuhara, M. and Seto, K.: Holocene relative sea-level change in Hiroshima Bay,  
680 Japan: A semi-quantitative reconstruction based on ostracodes, *Paleontol.*  
681 *Res.*, 10(2), 99–116, 2006.
- 682 Yasuhara, M., Yoshikawa, S., and Nanayama, F.: Reconstruction of the Holocene  
683 seismic history of a seabed fault using relative sea-level curves reconstructed  
684 by ostracode assemblages: Case study on the Median Tectonic Line in Iyo-  
685 nada Bay, western Japan, *Palaeogeogr. Palaeoclimatol.*, 222(3–4), 285–312, 2005.



- 686 Yasuhara, M., Irizuki, T., Yoshikawa, S., and Nanayama, F.: Changes in Holocene  
687 ostracode faunas and depositional environments in the Kitan Strait,  
688 southwestern Japan, *Paleontol. Res.*, 6(1), 85–99, 2002.
- 689 Yasuhara, M., Yamazaki, H., Irizuki, T., & Yoshikawa, S.: Temporal changes of  
690 ostracode assemblages and anthropogenic pollution during the last 100 years,  
691 in sediment cores from Hiroshima Bay, Japan, *The Holocene*, 13(4), 527–536,  
692 2003.
- 693 Yasuhara, M., Yamazaki, H., Tsujimoto, A., and Hirose, K.: The effect of long-term  
694 spatiotemporal variations in urbanization-induced eutrophication on a benthic  
695 ecosystem, Osaka Bay, Japan, *Limnol. Oceanogr.*, 52(4), 1633–1644, 2007.
- 696 Yasuhara, M., Hunt, G., Breitburg, D., Tsujimoto, A., and Katsuki, K.: Human-  
697 induced marine ecological degradation: micropaleontological perspectives,  
698 *Ecol. Evol.*, 2(12), 3242–3268, 2012a.
- 699 Yasuhara, M., Hunt, G., van Dijken, G., Arrigo, K. R., Cronin, T. M., and  
700 Wollenburg, J. E.: Patterns and controlling factors of species diversity in the  
701 Arctic Ocean, *J Biogeogr.*, 39(11), 2081–2088, 2012b.
- 702 Zhao, Q.: Recent ostracoda from the coast zone of the East China Sea and the Yellow  
703 Sea, *Marine Geology & Quaternary Geology*, 4, 45–57, 1984 (in Chinese).
- 704 Zhao, Q. and Wang, P.: Distribution of modern Ostracoda in the shelf seas off China,  
705 in: *Developments in Palaeontology and Stratigraphy*, edited by: T. Hanai,  
706 Ikeya, N., and Ishizaki, K., Kodansha, Tokyo, vol. 11, 805–821, 1988a (in  
707 Chinese with English abstract).



- 708 Zhao, Q. and Wang, P.: Modern Ostracoda in sediments of shelf seas off China:  
709 quantitative and qualitative distributions, *Oceanologia Et Limnologia Sinica*,  
710 19, 553–561, 1988b (in Chinese with English abstract).
- 711 Zhao, Q. and Whatley, R.: Recent podocopid ostracoda of the Sedili River and Jason  
712 bay, southeastern Malay Peninsula, *Micropaleontology*, 35, 168–187, 1989.
- 713 Zhao, Q. and Wang, P.: Modern Ostracoda in shelf seas off China: Zoogeographical  
714 zonation, *Oceanologia Et Limnologia Sinica*, 21, 458–464, 1990 (in Chinese  
715 with English abstract).
- 716 Zhao, Q. and Whatley, R.: New species of the ostracod genus *Neosinocythere* Huang  
717 (1985) from the Indo-West Pacific Region, *J. Micropalaeontol.*, 12(1), 1–7,  
718 doi: 10.1144/jm.12.1.1, 1993.
- 719 Zhao, Q., Wang, P., and Zhang, Q.: Ostracoda distribution in northern South China  
720 Sea continental Shelf, *Acta Oceanol. Sin. (Chinese Version)*, 8, 590–602,  
721 1986 (in Chinese).
- 722 Zhou, Y., Xie, Y., Chen, F., Long, G., and Chen, C.: Microfaunas in hole Zk201-2 at  
723 Zhujiang River Delta since Late Pleistocene and their implications for  
724 paleoenvironments, *Marine Geology & Quaternary Geology*, 35(4), 114–123,  
725 2015 (in Chinese with English abstract).

726

727

728 **Captions**

729



730 Fig. 1 Locality map showing the 52 sampling sites across Hong Kong, including 41  
731 open water sites (blue dots) and 11 typhoon shelter sites (red open dots). From west to  
732 east, DS: Deep Bay; NS: North Western waters; SS: Southern waters; VS: Victoria  
733 Harbour; ES: Eastern Buffer; JS: Junk Bay; TS: Tolo Harbour; PS: Port Shelter; MS:  
734 Mirs Bay.

735

736 Fig. 2 Spatial distribution of environmental parameters in Hong Kong. Mean surface-  
737 water chlorophyll-a concentration; water depth; summer (June to September) bottom-  
738 water dissolved oxygen content; mean bottom-water salinity; mean turbidity; mean  
739 summer (June to September) bottom-water temperature; mean winter (November to  
740 February) bottom-water temperature; and mean mud content. All are averaged values  
741 of the data obtained during 1986–2013 (Table 1).

742

743 Fig. 3 Spatial distribution of environmental parameters in Hong Kong. Mean copper  
744 (Cu) concentration, mean lead (Pb) concentration, and mean zinc (Zn) concentration  
745 in surface sediments. All are averaged values of the data obtained during 1986–2013  
746 (Table 1).

747

748 Fig. 4. Spatial distribution of the relative abundance of *Sinocytheridea impressa*,  
749 *Neomonoceratina delicata*, *Bicornucythere bisanensis* s.l., *Pistocythereis bradyi*,  
750 *Nipponocythere bicarinata*, *Spinileberis quadriaculeata*, *Keijella kloempritsensis*, and  
751 *Loxoconcha malayensis* in Hong Kong. See Figure 1 for sampling stations.

752

753 Fig. 5. Spatial distribution of the relative abundance of *Neosinocythere elongata*,  
754 *Stigmatocythere roesmani*, *Phlyctocythere japonica*, *Alocopocythere goujoni*,



755 *Hemikrithe orientalis*, *Loxoconcha epeterseni*, *Hemicytheridea reticulata* and  
756 *Neonesidea* spp. in Hong Kong. See Figure 1 for sampling stations.

757

758 Fig. 6. Spatial distribution of the relative abundance of *Propontocypris* spp., and  
759 *Xestoleberis* spp. in Hong Kong. See Figure 1 for sampling stations.

760

761 Fig. 7. Geographical distributions of the 18 taxa in the northwestern Pacific and Indo-  
762 Pacific regions, including *Sinocytheridea impressa*, *Neomonoceratina delicata*,  
763 *Pistocythereis bradyi*, *Bicornucythere bisanensis* s.l., *Keijella kloempritis*,  
764 *Nipponocythere bicarinata*, *Spinileberis quadriaculeata*, *Loxoconcha malayensis*,  
765 *Neosinocythere elongata*, *Stigmatocythere roesmani*, *Phlyctocythere japonica*,  
766 *Alocopocythere goujoni*, *Hemikrithe orientalis*, *Loxoconcha epeterseni*,  
767 *Hemicytheridea reticulata*, *Neonesidea* spp., *Propontocypris* spp., and *Xestoleberis*  
768 spp. The following references were used mainly to determine the geographical  
769 distributions of the species: Al Jumaily and Al-Sheikhly (1999); Dewi (1997); Dong  
770 et al. (2012); Fauzielly et al. (2013); Hong et al. (2017); Hou and Gou (2007);  
771 Hussain et al. (2004); Hussain et al. (2010); Hussain and Mohan (2000, 2001); Irizuki  
772 et al. (2006); Irizuki et al. (2009); Iwatani et al. (2014); Jie et al. (2013); Li (1985);  
773 Mostafawi (1992); Nishath et al. (2017); Noraswana et al. (2014); Pugliese et al.  
774 (2006); Schornikov et al. (2014); Tanaka et al. (2009); Tanaka et al. (2011); Wang et  
775 al. (1988); Wang and Zhang (1987); Wang and Zhao (1985); Zhao (1984); Zhao and  
776 Wang (1988a, 1988b, 1990); Zhao and Whatley (1993); Zhou et al. (2015).

777

778 Table 1. Summary of marine water/sediment parameters. Note: 1. Summer: June,  
779 July, August and September. 2. Winter: November, December, January and February.



780

781 Table 2. Best three regression models of the relative abundance of common species,  
782 including *Sinocytheridea impressa*, *Neomonoceratina delicata*, *Propontocypris* spp.,  
783 *Pistocythereis bradyi*, *Bicornucythere bisanensis* s.l., *Keijella kloempitensis*,  
784 *Nipponocythere bicarinata*, *Spinileberis quadriaculeata*, *Xestoleberis* spp.,  
785 *Loxoconcha malayensis*, *Neonesidea* spp., *Neosinocythere elongata*, *Stigmatocythere*  
786 *roesmani*, *Phlyctocythere japonica*, *Alocopocythere goujoni*, *Hemikrithe orientalis*,  
787 *Loxoconcha epeterseni* and *Hemicytheridea reticulata*. The table shows the  
788 coefficient of each term, adjusted  $R^2$ , the Akaike information criterion corrected for  
789 small sample size (AICc), and the Akaike weight (AW). Bold denotes significance at  
790  $P < 0.05$ . Overall  $P$  is  $< 0.05$  in all models. R: region. Other abbreviations are found in  
791 Table 1.

792

793 Table 3. Model-averaged parameter estimates and CIs of the relative abundance of  
794 common species, including *Sinocytheridea impressa*, *Neomonoceratina delicata*,  
795 *Propontocypris* spp., *Pistocythereis bradyi*, *Bicornucythere bisanensis* s.l., *Keijella*  
796 *kloempitensis*, *Nipponocythere bicarinata*, *Spinileberis quadriaculeata*, *Xestoleberis*  
797 spp., *Loxoconcha malayensis*, *Neonesidea* spp., *Neosinocythere elongata*,  
798 *Stigmatocythere roesmani*, *Phlyctocythere japonica*, *Alocopocythere goujoni*,  
799 *Hemikrithe orientalis*, *Loxoconcha epeterseni* and *Hemicytheridea reticulata*. CIs,  
800 confidence intervals; RI, relative importance (the sum of the Akaike weights of  
801 models that include the variable in question; see Materials and Methods); R, region.  
802 Other abbreviations are found in Table 1. Bold denotes CIs that exclude zero. For R,  
803 coefficient, lower CI, and upper CI values shown are averages of those for geographic  
804 regions.

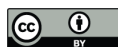

805

806 Table 4. GVIF value for Environmental Variables. Df, degree of freedom; R, region.

807 Other abbreviations are found in Table 1.

808

809 Table 5. Summary of autoecology for common ostracod taxa. Chl: Chlorophyll-a; D:

810 Water Depth; DO: Dissolved Oxygen; MD: Mud Content; Sal: Salinity; Tur:

811 Turbidity; WT: Winter Temperature; Pb: Lead; Zn: Zinc; R: Region.

812

813

814 Supplement A. Ostracod faunal list.

815

816 Supplement B. Dataset used for the regression modeling.

817

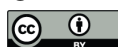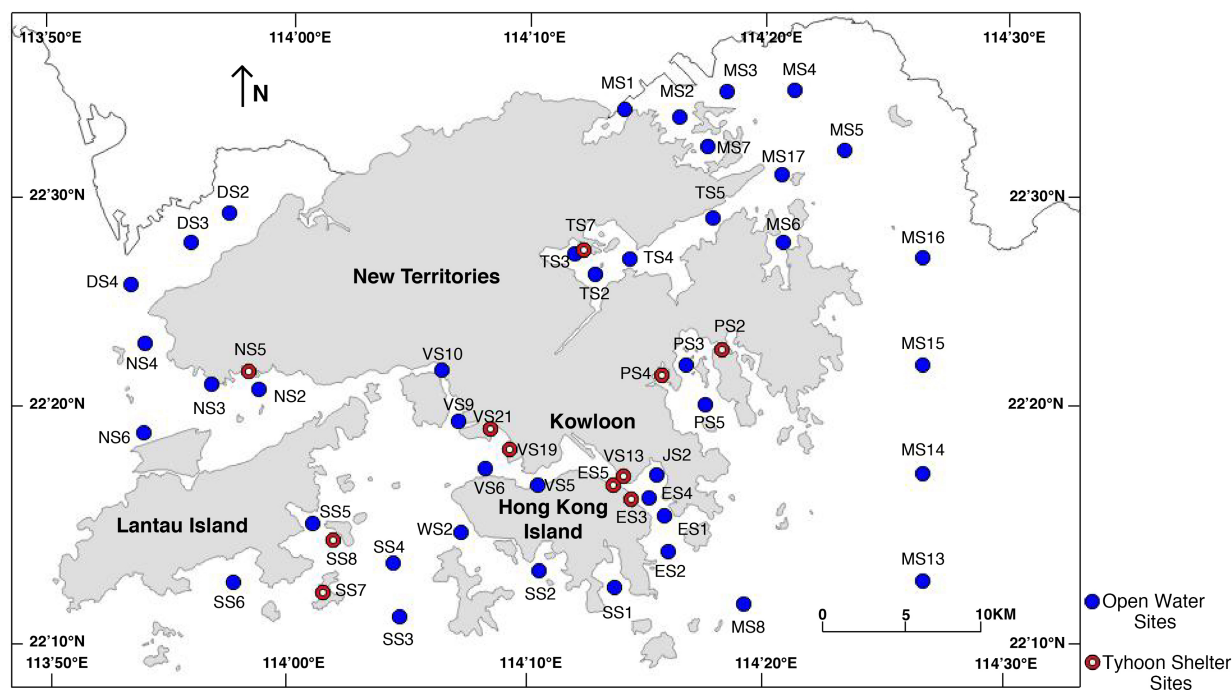

Fig. 1



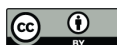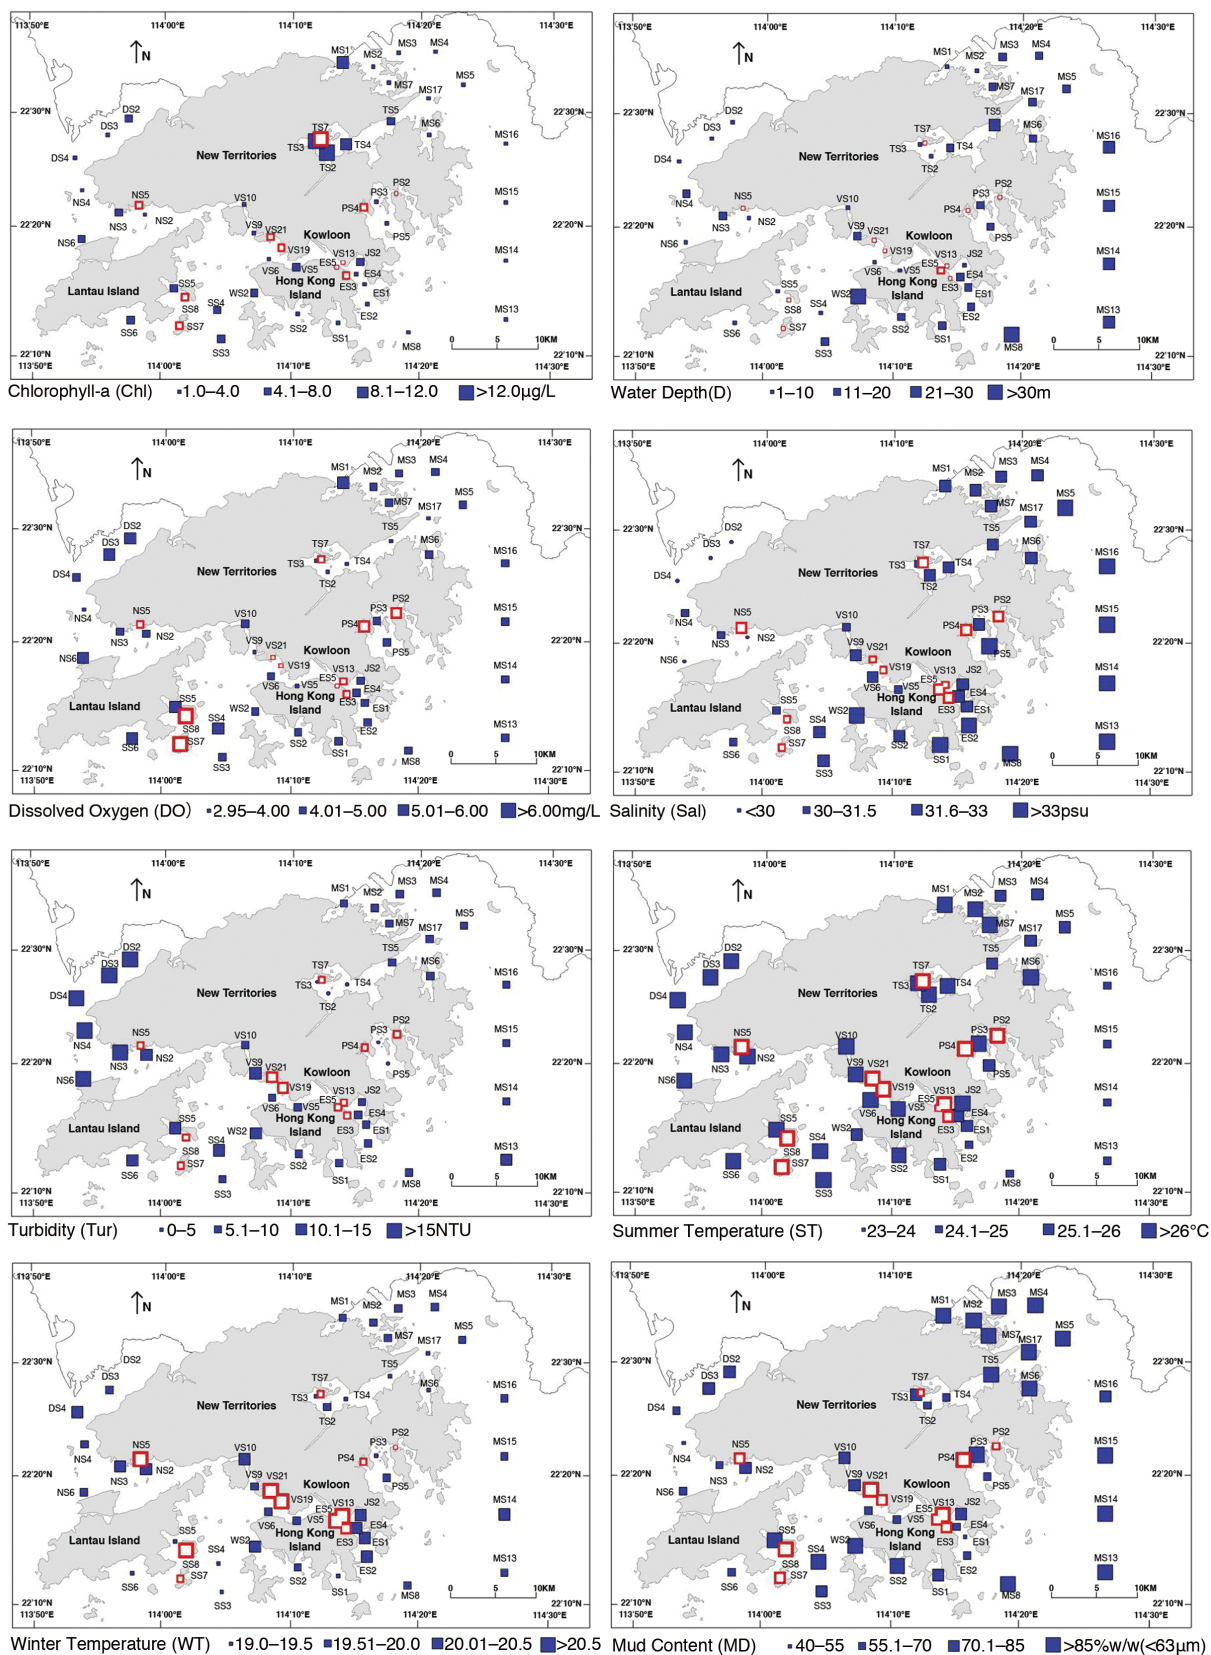

**Fig. 2**

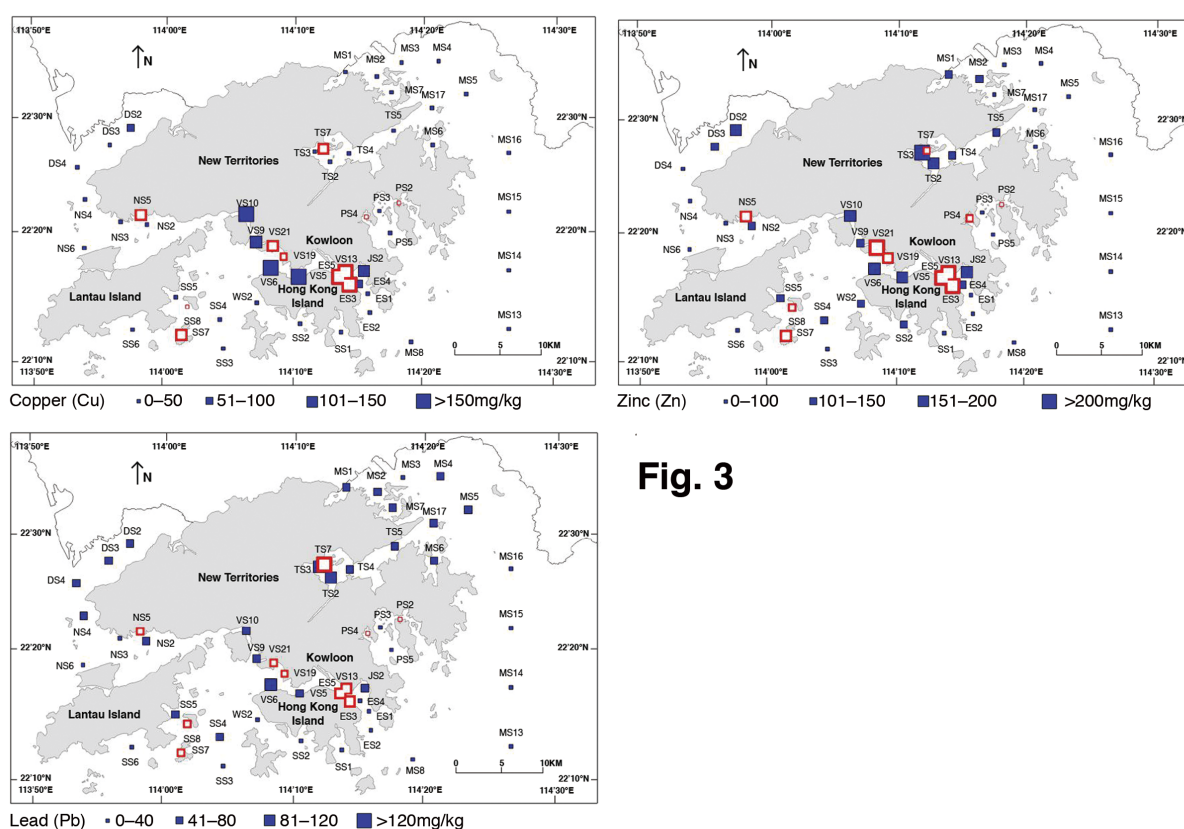

**Fig. 3**

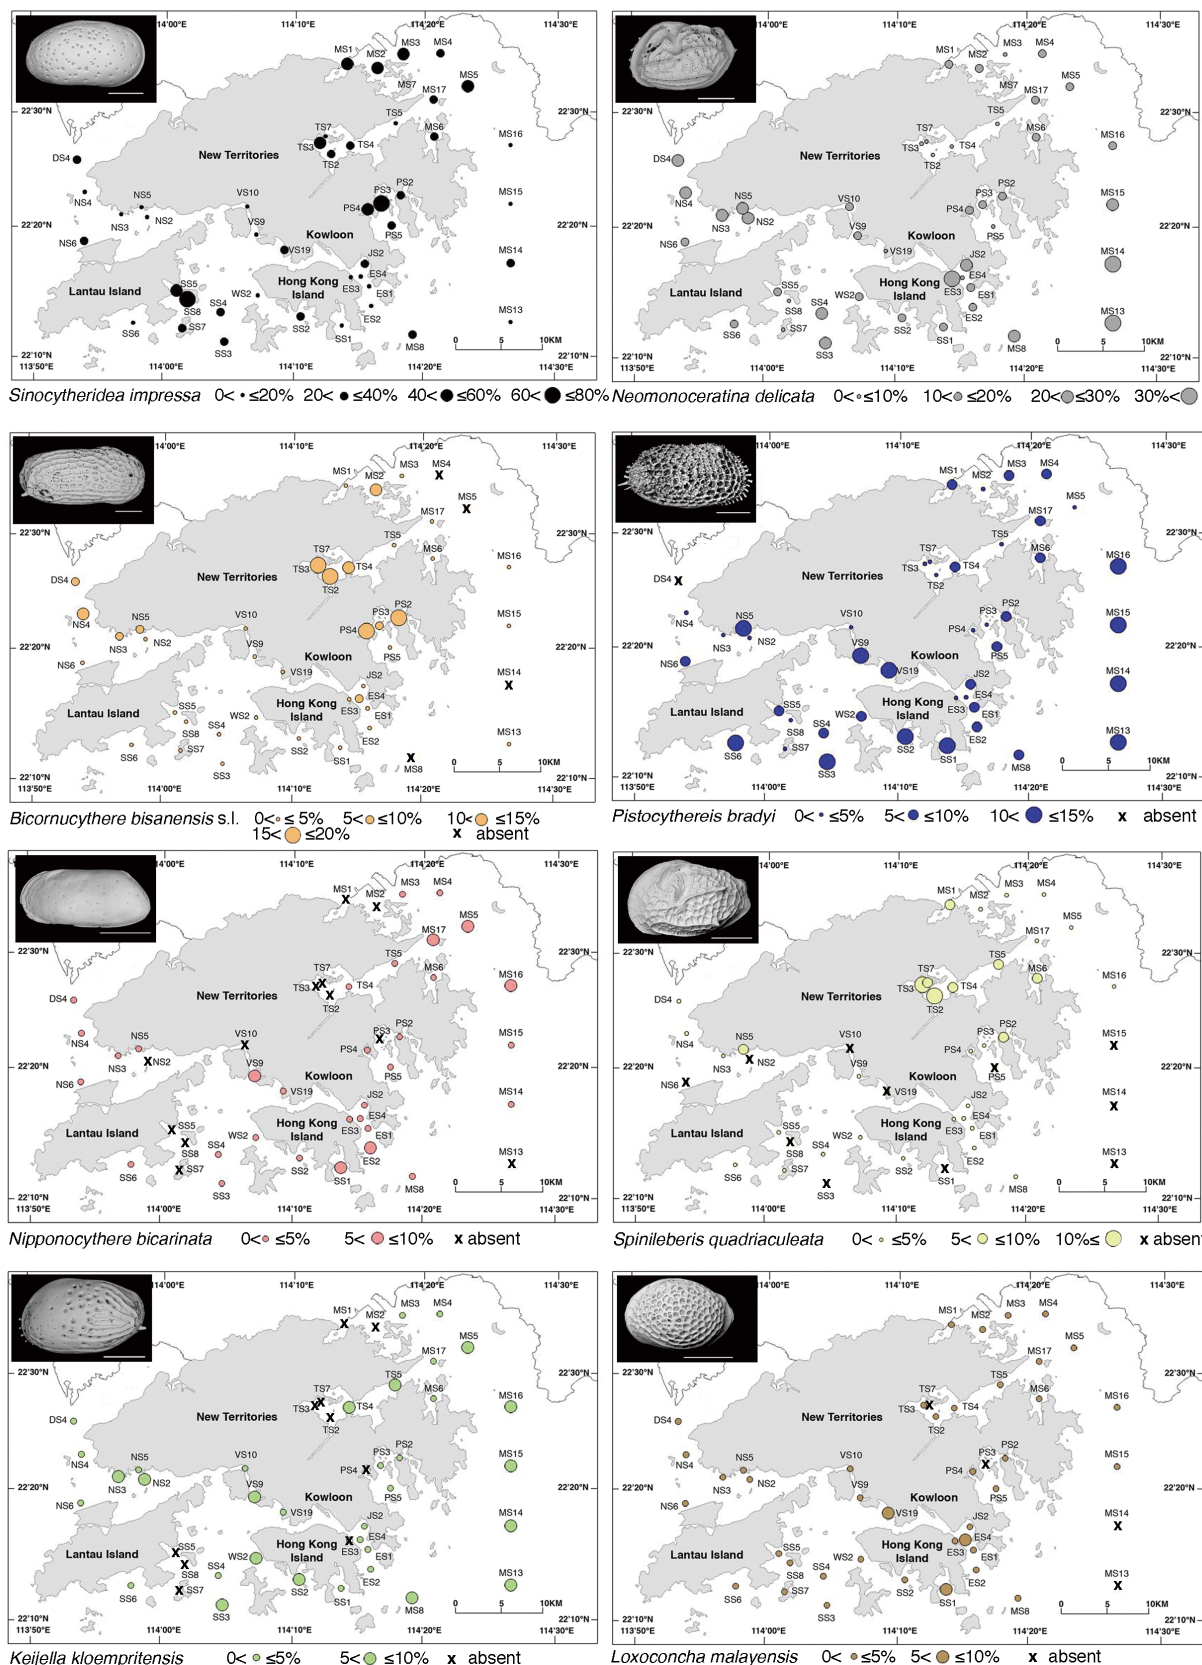

**Fig. 4**



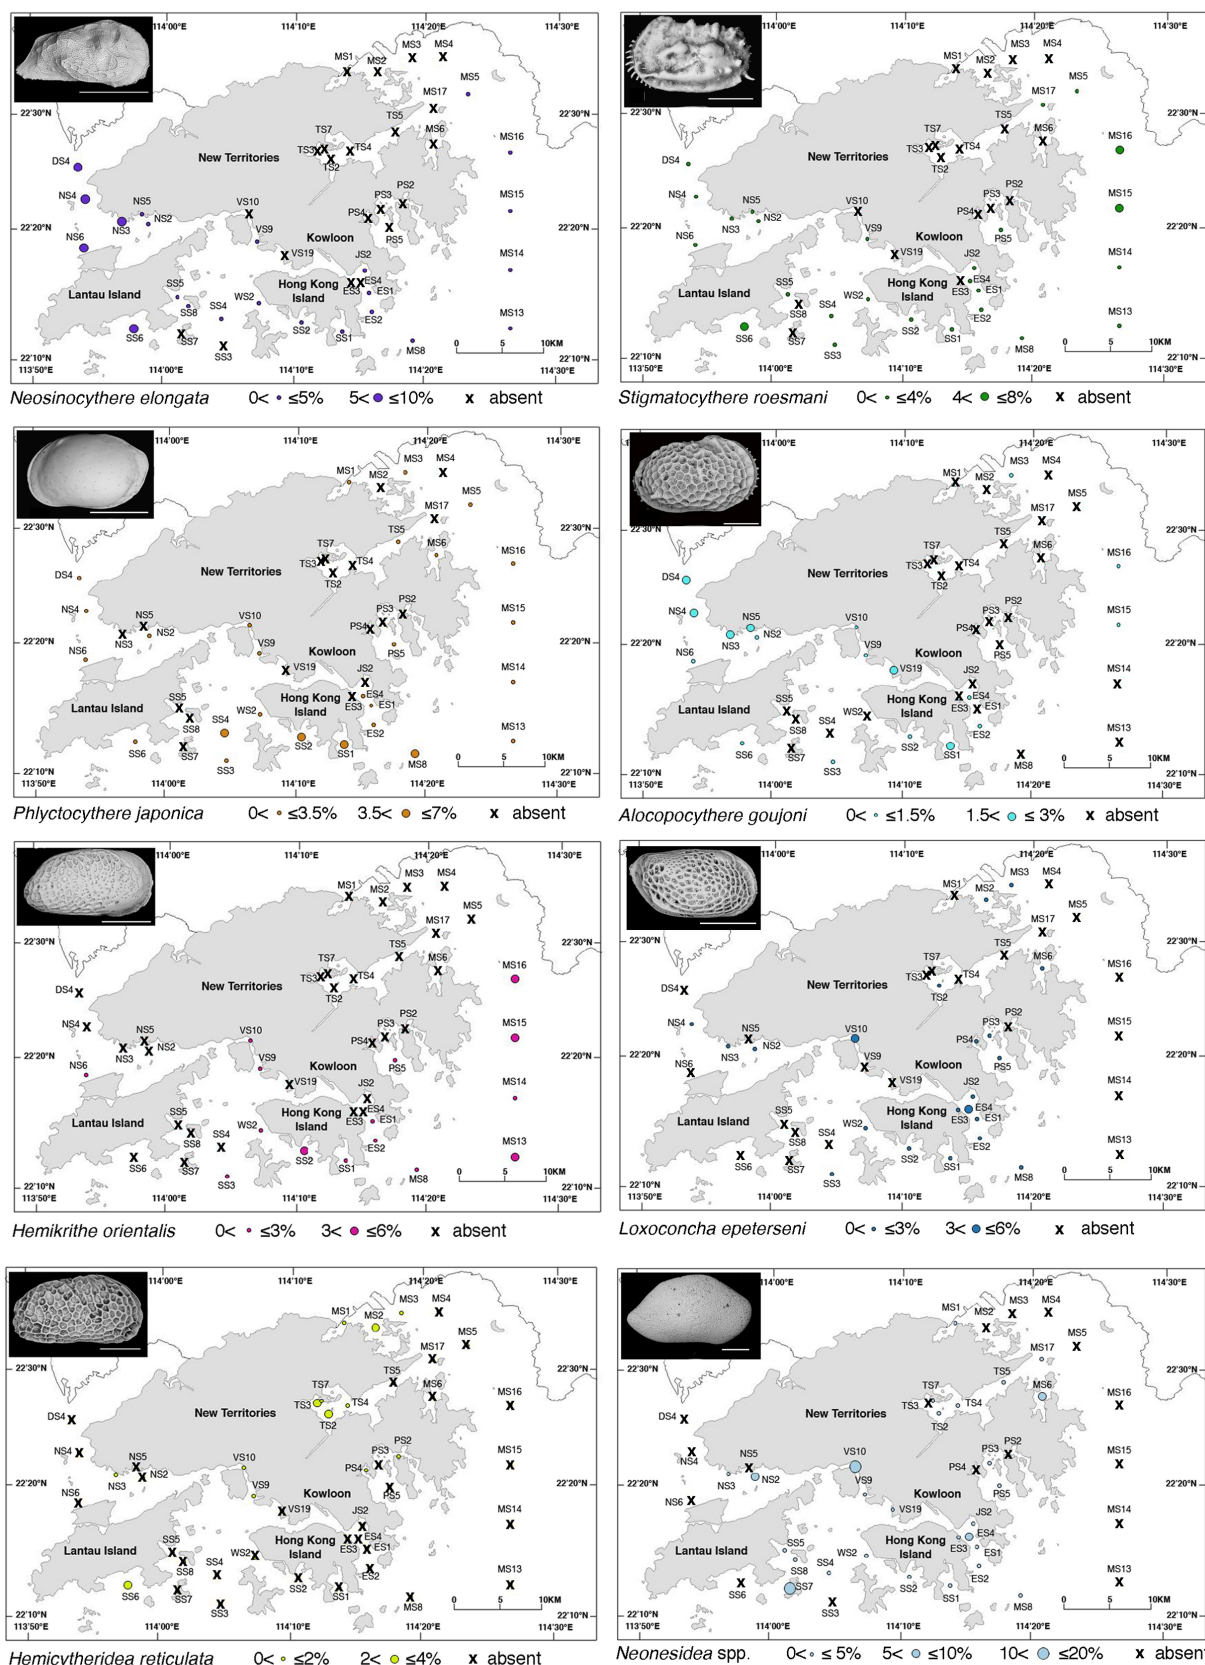

Fig. 5

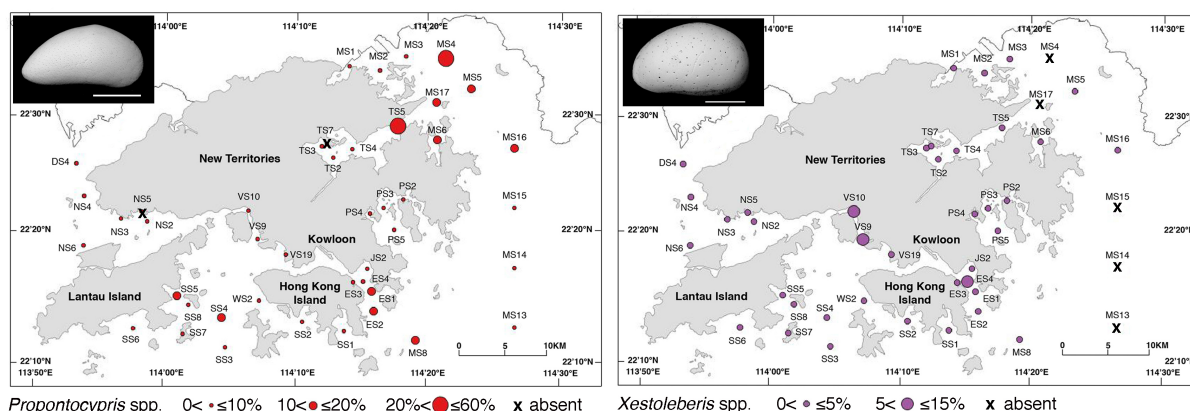

**Fig. 6**

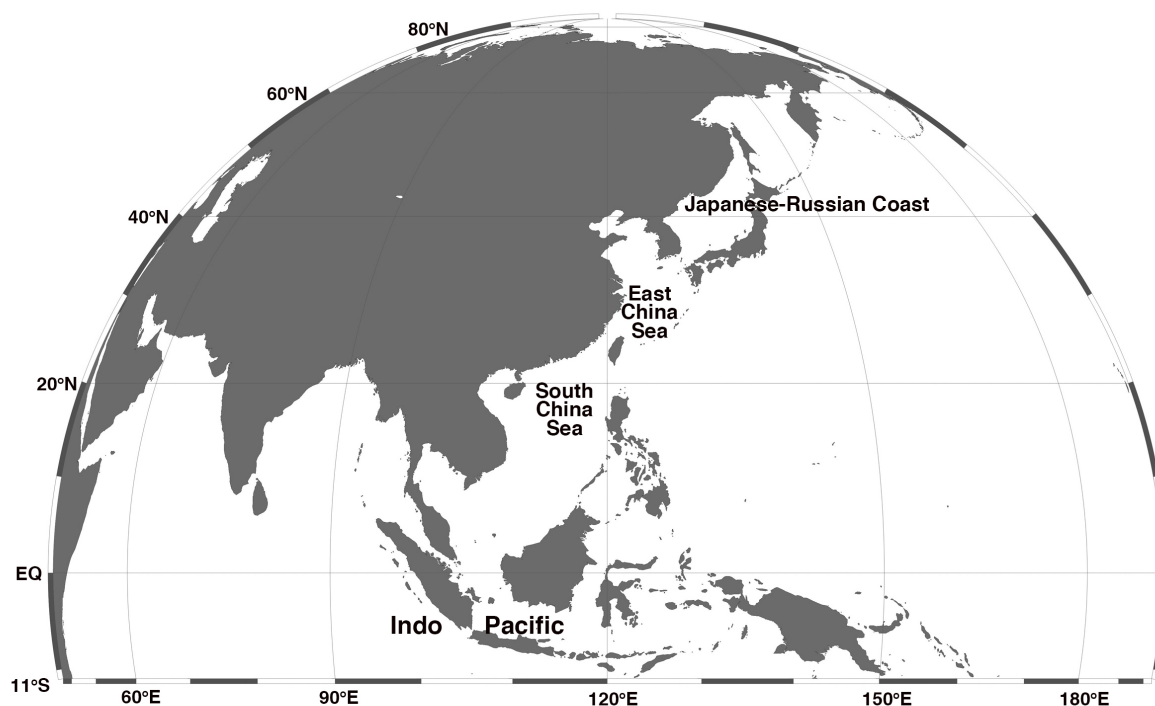

| Species                              | Indo Pacific | South China Sea | East China Sea | Japan and Russia Coast |
|--------------------------------------|--------------|-----------------|----------------|------------------------|
| <i>Sinocytheridea impressa</i>       |              |                 |                |                        |
| <i>Neomonoceratina delicata</i>      |              |                 |                |                        |
| <i>Pistocythereis bradyi</i>         |              |                 |                |                        |
| <i>Bicornucythere bisanensis</i> s.l |              |                 |                |                        |
| <i>Nipponocythere bicarinata</i>     |              |                 |                |                        |
| <i>Keijella kloempritsensis</i>      |              |                 |                |                        |
| <i>Spinileberis quadriaculeata</i>   |              |                 |                |                        |
| <i>Loxoconcha malayensis</i>         |              |                 |                |                        |
| <i>Neosinocythere elongata</i>       |              |                 |                |                        |
| <i>Stigmatocythere roesmani</i>      |              |                 |                |                        |
| <i>Phlytocythere japonica</i>        |              |                 |                |                        |
| <i>Alocopocythere goujoni</i>        |              |                 |                |                        |
| <i>Hemikrithe orientalis</i>         |              |                 |                |                        |
| <i>Loxoconcha epeterseni</i>         |              |                 |                |                        |
| <i>Hemicytheridea reticulata</i>     |              |                 |                |                        |
| <i>Neonesidea</i> spp.               |              |                 |                |                        |
| <i>Propontocypris</i> spp.           |              |                 |                |                        |
| <i>Xestoleberis</i> spp.             |              |                 |                |                        |

Fig. 7



Table 1.

| Parameter (Abbreviation)    | Unit         | Sampling Depth /<br>Material | Season (AD. 1986-2013) |
|-----------------------------|--------------|------------------------------|------------------------|
| Chlorophyll- <i>a</i> (Chl) | µg/L         | Surface water                | All year               |
| Water Depth (D)             | m            |                              | All year               |
| Dissolved Oxygen (DO)       | mg/L         | Bottom water                 | Summer <sup>1</sup>    |
| Mud Content (MD)            | %w/w (<63µm) | Bottom sediment              | All year               |
| Salinity (Sal)              |              | Bottom water                 | All year               |
| Turbidity (Tur)             | NTU          | Bottom water                 | All year               |
| Summer Temperature (ST)     | °C           | Bottom water                 | Summer <sup>1</sup>    |
| Winter Temperature (WT)     | °C           | Bottom water                 | Winter <sup>2</sup>    |
| Copper (Cu)                 | mg/kg        | Bottom sediment              | All year               |
| Lead (Pb)                   | mg/kg        | Bottom sediment              | All year               |
| Zinc (Zn)                   | mg/kg        | Bottom sediment              | All year               |



Table 2.

| Model                                 | Chl          | D            | DO           | MD           | Sal           | Tur          | WT    | Pb           | Zn          | R            | R <sup>2</sup> | AICc    | AW   |
|---------------------------------------|--------------|--------------|--------------|--------------|---------------|--------------|-------|--------------|-------------|--------------|----------------|---------|------|
| <i>Sinocytheridea impressa</i>        |              |              |              |              |               |              |       |              |             |              |                |         |      |
| 1                                     | <b>0.33</b>  |              | <b>-1.47</b> | <b>0.75</b>  | <b>-9.13</b>  |              |       |              |             | <b>0.34</b>  | 0.55           | -37.29  | 0.27 |
| 2                                     | <b>0.41</b>  |              | <b>-1.48</b> |              | <b>-8.75</b>  |              |       |              |             | <b>0.37</b>  | 0.50           | -35.24  | 0.10 |
| 3                                     |              |              | <b>-1.12</b> | <b>0.94</b>  | <b>-10.30</b> |              |       |              |             | <b>0.44</b>  | 0.49           | -34.78  | 0.08 |
| <i>Neomonoceratina delicata</i>       |              |              |              |              |               |              |       |              |             |              |                |         |      |
| 1                                     |              |              |              |              | <b>3.77</b>   | <b>0.34</b>  |       |              | <b>0.41</b> | <b>-0.13</b> | 0.48           | -82.57  | 0.29 |
| 2                                     |              |              | 0.43         |              | <b>5.02</b>   | <b>0.31</b>  |       |              | <b>0.39</b> | <b>-0.20</b> | 0.50           | -81.21  | 0.15 |
| 3                                     |              |              |              |              | <b>3.47</b>   | <b>0.33</b>  |       | -0.20        | <b>0.55</b> | <b>-0.12</b> | 0.48           | -79.32  | 0.06 |
| <i>Propontocypris</i> spp.            |              |              |              |              |               |              |       |              |             |              |                |         |      |
| 1                                     | <b>-0.28</b> |              |              | <b>0.46</b>  |               |              |       |              |             | <b>0.04</b>  | 0.20           | -72.47  | 0.15 |
| 2                                     | <b>-0.24</b> |              |              |              |               |              |       |              |             | <b>0.07</b>  | 0.13           | -71.74  | 0.10 |
| 3                                     | <b>-0.24</b> |              |              | <b>0.49</b>  |               |              | -2.46 |              |             | 0.02         | 0.22           | -70.76  | 0.06 |
| <i>Pistocythereis bradyi</i>          |              |              |              |              |               |              |       |              |             |              |                |         |      |
| 1                                     |              | <b>-0.12</b> |              |              | <b>2.67</b>   |              |       | <b>-0.21</b> |             | <b>-0.06</b> | 0.61           | -163.64 | 0.52 |
| 2                                     |              | <b>-0.13</b> |              |              | <b>2.87</b>   | 0.04         |       | <b>-0.20</b> |             | <b>-0.05</b> | 0.61           | -159.79 | 0.08 |
| 3                                     |              | <b>-0.12</b> | 0.07         |              | <b>2.83</b>   |              |       | <b>-0.21</b> |             | <b>-0.07</b> | 0.60           | -159.42 | 0.06 |
| <i>Bicornucythere bisanensis</i> s.l. |              |              |              |              |               |              |       |              |             |              |                |         |      |
| 1                                     |              | <b>-0.09</b> |              | <b>-0.23</b> |               |              |       |              |             | <b>0.02</b>  | 0.60           | -137.80 | 0.12 |
| 2                                     |              | <b>-0.08</b> |              |              |               |              |       |              |             | <b>-0.01</b> | 0.56           | -136.77 | 0.07 |
| 3                                     |              |              |              | <b>-0.29</b> |               |              |       | <b>0.18</b>  |             | 0.00         | 0.58           | -136.77 | 0.05 |
| <i>Keijella kloempitensis</i>         |              |              |              |              |               |              |       |              |             |              |                |         |      |
| 1                                     |              | <b>0.06</b>  |              |              |               |              |       | <b>-0.06</b> |             | <b>-0.02</b> | 0.56           | -202.12 | 0.12 |
| 2                                     |              | <b>0.08</b>  |              |              |               |              |       |              |             | <b>-0.02</b> | 0.53           | -201.51 | 0.09 |
| 3                                     |              | <b>0.06</b>  |              | 0.09         |               |              |       | <b>-0.08</b> |             | <b>-0.02</b> | 0.58           | -200.86 | 0.06 |
| <i>Nipponocythere bicarinata</i>      |              |              |              |              |               |              |       |              |             |              |                |         |      |
| 1                                     | <b>-0.07</b> |              | <b>-0.12</b> |              |               |              |       |              |             | <b>0.03</b>  | 0.43           | -200.57 | 0.11 |
| 2                                     | <b>-0.09</b> |              |              |              |               |              |       |              |             | <b>0.03</b>  | 0.39           | -200.38 | 0.10 |
| 3                                     | <b>-0.09</b> | -0.03        | <b>-0.16</b> |              |               |              |       |              |             | <b>0.04</b>  | 0.45           | -199.30 | 0.06 |
| <i>Spinileberis quadriaculeata</i>    |              |              |              |              |               |              |       |              |             |              |                |         |      |
| 1                                     | 0.06         |              |              |              |               | <b>-0.09</b> |       |              |             | <b>-0.04</b> | 0.63           | -183.88 | 0.10 |
| 2                                     |              | <b>-0.05</b> |              |              |               |              |       |              |             | <b>0.02</b>  | 0.60           | -182.94 | 0.06 |
| 3                                     | <b>0.08</b>  |              |              |              |               | <b>-0.09</b> | -0.75 |              |             | <b>-0.04</b> | 0.65           | -182.66 | 0.05 |
| <i>Xestoleberis</i> spp.              |              |              |              |              |               |              |       |              |             |              |                |         |      |
| 1                                     |              | <b>0.04</b>  | <b>0.15</b>  | <b>-0.11</b> |               | <b>-0.08</b> |       | <b>0.05</b>  |             | <b>-0.02</b> | 0.62           | -225.55 | 0.09 |
| 2                                     |              | <b>0.03</b>  | <b>0.15</b>  | <b>-0.09</b> |               | <b>-0.09</b> |       |              |             | <b>-0.02</b> | 0.59           | -225.29 | 0.08 |
| 3                                     |              |              |              | <b>-0.09</b> |               | <b>-0.06</b> |       |              |             | <b>0.00</b>  | 0.52           | -224.60 | 0.06 |





| Model                            | Chl          | D            | DO           | MD           | Sal          | Tur          | WT          | Pb           | Zn           | R            | R <sup>2</sup> | AICc    | AW   |
|----------------------------------|--------------|--------------|--------------|--------------|--------------|--------------|-------------|--------------|--------------|--------------|----------------|---------|------|
| <i>Loxoconcha malayensis</i>     |              |              |              |              |              |              |             |              |              |              |                |         |      |
| 1                                |              | <b>-0.03</b> | <b>-0.14</b> | <b>-0.12</b> |              |              |             |              |              | <b>0.03</b>  | 0.55           | -229.55 | 0.10 |
| 2                                | <b>0.04</b>  |              | <b>-0.13</b> | <b>-0.12</b> |              |              |             |              |              | <b>0.02</b>  | 0.55           | -229.42 | 0.09 |
| 3                                |              | <b>-0.04</b> | <b>-0.14</b> | <b>-0.10</b> |              |              |             | -0.04        |              | <b>0.03</b>  | 0.57           | -228.47 | 0.06 |
| <i>Neonesidea</i> spp.           |              |              |              |              |              |              |             |              |              |              |                |         |      |
| 1                                | <b>-0.12</b> |              |              | <b>-0.25</b> |              |              |             |              | <b>0.19</b>  | <b>0.05</b>  | 0.28           | -149.00 | 0.09 |
| 2                                | <b>-0.11</b> |              | <b>0.33</b>  | <b>-0.24</b> |              |              | -1.13       |              | <b>0.20</b>  | <b>0.05</b>  | 0.31           | -147.86 | 0.05 |
| 3                                |              |              | 0.21         |              |              |              |             |              |              | 0.02         | 0.08           | -147.40 | 0.04 |
| <i>Neosinocythere elongata</i>   |              |              |              |              |              |              |             |              |              |              |                |         |      |
| 1                                | <b>-0.02</b> |              |              |              |              | <b>0.09</b>  |             |              |              | <b>-0.03</b> | 0.76           | -244.70 | 0.09 |
| 2                                |              |              |              | <b>-0.06</b> |              | <b>0.08</b>  |             |              |              | <b>-0.03</b> | 0.76           | -244.42 | 0.08 |
| 3                                |              |              |              |              |              | <b>0.09</b>  |             |              |              | <b>-0.03</b> | 0.74           | -244.15 | 0.07 |
| <i>Stigmatocythere roesmani</i>  |              |              |              |              |              |              |             |              |              |              |                |         |      |
| 1                                |              |              |              |              |              |              |             | <b>-0.08</b> |              | <b>0.00</b>  | 0.23           | -225.23 | 0.07 |
| 2                                |              |              |              |              | 0.36         |              |             | <b>-0.07</b> |              | <b>-0.02</b> | 0.25           | -224.06 | 0.04 |
| 3                                |              |              | <b>0.10</b>  |              | <b>0.67</b>  |              |             | <b>-0.07</b> |              | <b>0.30</b>  | 0.30           | -224.03 | 0.04 |
| <i>Phlyctocythere japonica</i>   |              |              |              |              |              |              |             |              |              |              |                |         |      |
| 1                                | <b>0.04</b>  |              |              |              |              |              |             |              |              | 0.00         | 0.28           | -238.60 | 0.19 |
| 2                                | <b>0.03</b>  |              |              |              | 0.33         |              |             |              |              | -0.02        | 0.30           | -237.01 | 0.09 |
| 3                                | <b>0.03</b>  |              |              |              |              |              |             | -0.02        |              | 0.00         | 0.27           | -235.62 | 0.04 |
| <i>Alocopocythere goujoni</i>    |              |              |              |              |              |              |             |              |              |              |                |         |      |
| 1                                |              |              |              |              | <b>0.21</b>  |              |             |              |              | <b>-0.04</b> | 0.68           | -331.97 | 0.09 |
| 2                                |              | <b>-0.01</b> |              |              | <b>0.28</b>  |              |             |              | <b>-0.01</b> | <b>-0.04</b> | 0.71           | -330.52 | 0.05 |
| 3                                |              | <b>-0.01</b> |              |              | <b>0.27</b>  |              |             | <b>-0.02</b> |              | <b>-0.04</b> | 0.71           | -330.45 | 0.04 |
| <i>Hemikrithe orientalis</i>     |              |              |              |              |              |              |             |              |              |              |                |         |      |
| 1                                | <b>0.03</b>  |              |              |              |              |              | <b>0.46</b> |              |              | 0.00         | 0.19           | -249.44 | 0.11 |
| 2                                | <b>0.03</b>  | <b>0.07</b>  |              |              |              |              |             |              |              | 0.00         | 0.18           | -248.67 | 0.07 |
| 3                                | <b>0.04</b>  | 0.06         |              |              |              |              | <b>0.42</b> |              |              | 0.00         | 0.23           | -248.60 | 0.07 |
| <i>Loxoconcha epeterseni</i>     |              |              |              |              |              |              |             |              |              |              |                |         |      |
| 1                                | <b>0.03</b>  |              |              |              | <b>-0.33</b> | <b>-0.03</b> |             |              |              | <b>0.01</b>  | 0.49           | -288.61 | 0.11 |
| 2                                | <b>0.02</b>  | <b>0.04</b>  |              | <b>-0.04</b> | <b>-0.34</b> | <b>-0.04</b> |             |              |              | <b>0.00</b>  | 0.56           | -287.76 | 0.07 |
| 3                                | 0.02         | <b>0.04</b>  |              |              | <b>-0.34</b> | <b>-0.04</b> |             |              |              | 0.00         | 0.51           | -287.31 | 0.06 |
| <i>Hemicytheridea reticulata</i> |              |              |              |              |              |              |             |              |              |              |                |         |      |
| 1                                |              | <b>-0.03</b> |              |              |              |              |             | <b>-0.04</b> |              | <b>0.01</b>  | 0.23           | -270.79 | 0.14 |
| 2                                | 0.02         | <b>-0.02</b> |              |              |              |              |             | <b>-0.04</b> |              | 0.01         | 0.26           | -269.44 | 0.07 |
| 3                                | <b>0.03</b>  |              |              |              |              |              |             | <b>-0.03</b> |              | 0.00         | 0.19           | -268.64 | 0.05 |

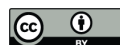

Table 3.

| Term                                  | RI          | Coefficient  | Lower CI      | Upper CI     | Term                              | RI          | Coefficient  | Lower CI     | Upper CI     |
|---------------------------------------|-------------|--------------|---------------|--------------|-----------------------------------|-------------|--------------|--------------|--------------|
| <i>Sinocytheridea impressa</i>        |             |              |               |              | <i>Keijella kloempritensis</i>    |             |              |              |              |
| R                                     | 1.00        | 0.36         | -0.09         | 0.81         | R                                 | 1.00        | -0.02        | -0.09        | 0.04         |
| Sal                                   | <b>0.99</b> | <b>-9.26</b> | <b>-14.61</b> | <b>-3.91</b> | D                                 | <b>0.86</b> | <b>0.06</b>  | <b>0.02</b>  | <b>0.11</b>  |
| DO                                    | <b>0.91</b> | <b>-1.42</b> | <b>-2.48</b>  | <b>-0.37</b> | Pb                                | 0.58        | -0.08        | -0.17        | 0.01         |
| MD                                    | <b>0.75</b> | <b>0.82</b>  | <b>0.07</b>   | <b>1.57</b>  | Sal                               | 0.35        | 0.68         | -0.21        | 1.58         |
| Chl                                   | <b>0.74</b> | <b>0.82</b>  | <b>0.03</b>   | <b>0.70</b>  | MD                                | 0.25        | 0.08         | -0.05        | 0.21         |
| WT                                    | 0.20        | <b>0.82</b>  | -2.34         | 8.89         | Tur                               | 0.24        | 0.05         | -0.03        | 0.14         |
| Zn                                    | 0.13        | <b>0.82</b>  | -0.68         | 0.51         | Chl                               | 0.22        | -0.04        | -0.11        | 0.03         |
| Tur                                   | 0.11        | <b>0.82</b>  | -0.61         | 0.30         | Zn                                | 0.17        | 0.02         | -0.11        | 0.14         |
| D                                     | 0.11        | <b>0.82</b>  | -0.29         | 0.41         | WT                                | 0.14        | 0.33         | -0.55        | 1.22         |
| Pb                                    | 0.10        | <b>0.82</b>  | -0.62         | 0.46         | DO                                | 0.11        | 0.03         | -0.14        | 0.19         |
| <i>Neomonoceratina delicata</i>       |             |              |               |              | <i>Nipponocythere bicarinata</i>  |             |              |              |              |
| R                                     | 1.00        | -0.15        | -0.42         | 0.12         | R                                 | 1.00        | 0.02         | -0.04        | 0.09         |
| Zn                                    | <b>0.94</b> | <b>0.41</b>  | <b>0.11</b>   | <b>0.70</b>  | Chl                               | <b>0.92</b> | <b>-0.08</b> | <b>-0.14</b> | <b>-0.02</b> |
| Sal                                   | <b>0.93</b> | <b>4.06</b>  | <b>1.00</b>   | <b>7.13</b>  | DO                                | 0.50        | -0.14        | -0.30        | 0.02         |
| Tur                                   | <b>0.84</b> | <b>0.33</b>  | <b>0.06</b>   | <b>0.59</b>  | D                                 | 0.30        | -0.03        | -0.08        | 0.02         |
| DO                                    | 0.33        | 0.45         | -0.17         | 1.06         | WT                                | 0.25        | -0.03        | -0.08        | 0.02         |
| Pb                                    | 0.17        | -0.18        | -0.67         | 0.30         | Sal                               | 0.24        | 0.51         | -0.35        | 1.36         |
| MD                                    | 0.14        | 0.25         | -0.33         | 0.84         | Tur                               | 0.19        | -0.04        | -0.11        | 0.04         |
| D                                     | 0.11        | -0.01        | -0.22         | 0.20         | Zn                                | 0.18        | -0.04        | -0.12        | 0.04         |
| WT                                    | 0.11        | -0.86        | -4.32         | 2.60         | Pb                                | 0.13        | -0.03        | -0.11        | 0.06         |
| Chl                                   | 0.09        | 0.00         | -0.24         | 0.23         | MD                                | 0.10        | 0.00         | -0.13        | 0.13         |
| <i>Propontocypris</i> spp.            |             |              |               |              | <i>Spinileberis quadriculeata</i> |             |              |              |              |
| R                                     | 1.00        | 0.05         | -0.19         | 0.30         | R                                 | -0.01       |              | -0.10        | 0.07         |
| Chl                                   | <b>0.80</b> | <b>-0.26</b> | <b>-0.47</b>  | <b>-0.04</b> | Tur                               | <b>0.66</b> | <b>-0.09</b> | <b>-0.17</b> | <b>0.00</b>  |
| MD                                    | 0.58        | 0.50         | -0.03         | 1.03         | Chl                               | <b>0.54</b> | <b>0.06</b>  | <b>0.00</b>  | <b>0.13</b>  |
| WT                                    | 0.29        | -2.60        | -6.48         | 1.28         | D                                 | 0.45        | -0.05        | -0.10        | 0.01         |
| Pb                                    | 0.19        | -0.18        | -0.55         | 0.20         | WT                                | 0.32        | -0.76        | -1.82        | 0.31         |
| Sal                                   | 0.17        | -1.48        | -4.88         | 1.92         | DO                                | 0.19        | 0.10         | -0.10        | 0.30         |
| DO                                    | 0.15        | -0.27        | -0.99         | 0.45         | MD                                | 0.17        | -0.07        | -0.23        | 0.09         |
| Zn                                    | 0.14        | -0.03        | -0.48         | 0.41         | Pb                                | 0.17        | -0.05        | -0.16        | 0.07         |
| D                                     | 0.13        | 0.04         | -0.17         | 0.26         | Zn                                | 0.14        | 0.03         | -0.09        | 0.15         |
| Tur                                   | 0.10        | 0.01         | -0.29         | 0.32         | Sal                               | 0.13        | 0.11         | -1.03        | 1.26         |
| <i>Pistocythereis bradyi</i>          |             |              |               |              | <i>Xestoleberis</i> spp.          |             |              |              |              |
| R                                     | 1.00        | -0.06        | -0.15         | 0.04         | R                                 | 1.00        | -0.01        | -0.06        | 0.05         |
| Sal                                   | <b>1.00</b> | <b>2.71</b>  | <b>1.53</b>   | <b>3.88</b>  | Tur                               | <b>0.77</b> | <b>-0.07</b> | <b>-0.12</b> | <b>-0.01</b> |
| D                                     | <b>1.00</b> | <b>-0.12</b> | <b>-0.19</b>  | <b>-0.06</b> | MD                                | <b>0.66</b> | <b>-0.10</b> | <b>-0.19</b> | <b>0.00</b>  |
| Pb                                    | <b>0.97</b> | <b>-0.21</b> | <b>-0.32</b>  | <b>-0.10</b> | DO                                | <b>0.63</b> | <b>0.13</b>  | <b>0.00</b>  | <b>0.26</b>  |
| Tur                                   | 0.12        | 0.04         | -0.07         | 0.15         | D                                 | 0.42        | 0.03         | -0.01        | 0.07         |
| Zn                                    | 0.11        | -0.05        | -0.23         | 0.13         | Pb                                | 0.33        | 0.04         | -0.02        | 0.11         |
| DO                                    | 0.10        | 0.06         | -0.18         | 0.31         | Sal                               | 0.27        | 0.46         | -0.24        | 1.15         |
| WT                                    | 0.10        | 0.33         | -0.98         | 1.64         | WT                                | 0.19        | -0.37        | -1.06        | 0.31         |
| Chl                                   | 0.09        | 0.02         | -0.08         | 0.11         | Zn                                | 0.14        | 0.00         | -0.09        | 0.08         |
| MD                                    | 0.08        | -0.01        | -0.20         | 0.18         | Chl                               | 0.10        | 0.00         | -0.05        | 0.05         |
| <i>Bicornucythere bisanensis</i> s.l. |             |              |               |              | <i>Loxoconcha malayensis</i>      |             |              |              |              |
| R                                     | 1.00        | 0.01         | -0.11         | 0.12         | R                                 | 1.00        | 0.02         | -0.02        | 0.06         |
| MD                                    | 0.63        | -0.26        | -0.52         | 0.00         | DO                                | <b>0.87</b> | <b>-0.14</b> | <b>-0.25</b> | <b>-0.03</b> |
| D                                     | <b>0.62</b> | <b>-0.08</b> | <b>-0.16</b>  | <b>0.00</b>  | MD                                | <b>0.85</b> | <b>-0.11</b> | <b>-0.20</b> | <b>-0.02</b> |
| Pb                                    | 0.38        | 0.14         | -0.05         | 0.33         | D                                 | 0.48        | -0.03        | -0.06        | 0.00         |
| DO                                    | 0.20        | 0.17         | -0.15         | 0.48         | Chl                               | 0.40        | 0.03         | -0.01        | 0.08         |
| Chl                                   | 0.19        | 0.06         | -0.07         | 0.19         | Pb                                | 0.29        | -0.04        | -0.10        | 0.02         |
| Tur                                   | 0.19        | 0.07         | -0.08         | 0.22         | WT                                | 0.26        | 0.41         | -0.21        | 1.03         |
| Zn                                    | 0.16        | -0.01        | -0.28         | 0.25         | Zn                                | 0.20        | -0.03        | -0.10        | 0.04         |
| Sal                                   | 0.12        | -0.02        | -1.86         | 1.82         | Sal                               | 0.15        | -0.26        | -0.91        | 0.39         |
| WT                                    | 0.10        | 0.06         | -1.80         | 1.92         | Tur                               | 0.11        | -0.01        | -0.07        | 0.05         |



| Term                            | RI          | Coefficient  | Lower CI     | Upper CI    | Term                             | RI          | Coefficient  | Lower CI     | Upper CI    |
|---------------------------------|-------------|--------------|--------------|-------------|----------------------------------|-------------|--------------|--------------|-------------|
| <i>Neonesidea</i> spp.          |             |              |              |             | <i>Alocopocythere goujoni</i>    |             |              |              |             |
| R                               | 1.00        | 0.02         | -0.09        | 0.13        | R                                | 1.00        | -0.03        | -0.05        | -0.02       |
| <b>DO</b>                       | <b>0.72</b> | <b>0.30</b>  | <b>0.02</b>  | <b>0.57</b> | <b>Sal</b>                       | <b>0.78</b> | <b>0.22</b>  | <b>0.03</b>  | <b>0.41</b> |
| Zn                              | 0.58        | 0.15         | -0.01        | 0.31        | D                                | 0.46        | -0.01        | -0.02        | 0.00        |
| MD                              | 0.46        | -0.23        | -0.49        | 0.03        | DO                               | 0.43        | -0.03        | -0.07        | 0.01        |
| Chl                             | 0.42        | -0.09        | -0.21        | 0.02        | Pb                               | 0.31        | -0.01        | -0.03        | 0.01        |
| WT                              | 0.32        | -1.13        | -2.69        | 0.42        | Zn                               | 0.29        | -0.01        | -0.03        | 0.01        |
| Tur                             | 0.24        | -0.09        | -0.22        | 0.05        | WT                               | 0.24        | 0.13         | -0.08        | 0.33        |
| D                               | 0.23        | 0.05         | -0.04        | 0.15        | Tur                              | 0.18        | 0.01         | -0.01        | 0.03        |
| Pb                              | 0.17        | 0.05         | -0.13        | 0.24        | MD                               | 0.14        | -0.01        | -0.04        | 0.02        |
| Sal                             | 0.15        | -0.60        | -2.20        | 1.01        | Chl                              | 0.11        | 0.00         | -0.01        | 0.01        |
| <i>Neosinocythere elongata</i>  |             |              |              |             | <i>Hemikrithe orientalis</i>     |             |              |              |             |
| R                               | 1.00        | -0.03        | -0.07        | 0.00        | R                                | 1.00        | 0.00         | -0.04        | 0.03        |
| <b>Tur</b>                      | <b>1.00</b> | <b>0.08</b>  | <b>0.04</b>  | <b>0.13</b> | <b>D</b>                         | <b>0.77</b> | <b>0.03</b>  | <b>0.00</b>  | <b>0.05</b> |
| MD                              | 0.33        | -0.05        | -0.13        | 0.02        | WT                               | 0.46        | 0.43         | -0.07        | 0.93        |
| Chl                             | 0.30        | -0.02        | -0.05        | 0.01        | DO                               | 0.44        | 0.08         | -0.02        | 0.17        |
| WT                              | 0.26        | -0.33        | -0.85        | 0.18        | Sal                              | 0.30        | 0.37         | -0.17        | 0.90        |
| Zn                              | 0.21        | -0.02        | -0.06        | 0.02        | Pb                               | 0.22        | -0.03        | -0.08        | 0.02        |
| Pb                              | 0.19        | -0.02        | -0.07        | 0.02        | Tur                              | 0.17        | 0.02         | -0.03        | 0.07        |
| D                               | 0.12        | 0.00         | -0.03        | 0.03        | Chl                              | 0.14        | -0.01        | -0.05        | 0.03        |
| DO                              | 0.12        | -0.02        | -0.11        | 0.07        | Zn                               | 0.11        | 0.00         | -0.05        | 0.05        |
| Sal                             | 0.10        | 0.04         | -0.40        | 0.49        | MD                               | 0.10        | -0.01        | -0.08        | 0.07        |
| <i>Stigmatocythere roesmani</i> |             |              |              |             | <i>Loxoconcha epeterseni</i>     |             |              |              |             |
| R                               | 1.00        | -0.01        | -0.07        | 0.05        | R                                | 1.00        | 0.00         | -0.02        | 0.03        |
| Sal                             | 0.61        | 0.62         | -0.04        | 1.27        | <b>D</b>                         | <b>0.94</b> | <b>0.03</b>  | <b>0.00</b>  | <b>0.05</b> |
| <b>Pb</b>                       | <b>0.61</b> | <b>-0.06</b> | <b>-0.12</b> | <b>0.00</b> | <b>Tur</b>                       | <b>0.76</b> | <b>-0.03</b> | <b>-0.06</b> | <b>0.00</b> |
| Tur                             | 0.37        | 0.04         | -0.01        | 0.10        | Sal                              | 0.53        | -0.30        | -0.62        | 0.02        |
| Zn                              | 0.31        | -0.05        | -0.11        | 0.02        | MD                               | 0.38        | -0.04        | -0.08        | 0.01        |
| DO                              | 0.31        | 0.09         | -0.04        | 0.22        | Chl                              | 0.30        | 0.02         | -0.01        | 0.04        |
| MD                              | 0.23        | -0.06        | -0.16        | 0.04        | DO                               | 0.26        | 0.04         | -0.02        | 0.10        |
| Chl                             | 0.19        | -0.02        | -0.07        | 0.02        | Pb                               | 0.17        | 0.01         | -0.02        | 0.05        |
| WT                              | 0.19        | 0.35         | -0.33        | 1.02        | WT                               | 0.13        | -0.13        | -0.48        | 0.22        |
| D                               | 0.14        | -0.01        | -0.05        | 0.04        | Zn                               | 0.12        | 0.01         | -0.03        | 0.04        |
| <i>Phlyctocythere japonica</i>  |             |              |              |             | <i>Hemicytheridea reticulata</i> |             |              |              |             |
| R                               | 1.00        | -0.01        | -0.05        | 0.03        | R                                | 1.00        | 0.01         | -0.02        | 0.03        |
| <b>D</b>                        | <b>0.80</b> | <b>0.03</b>  | <b>0.01</b>  | <b>0.06</b> | <b>Pb</b>                        | <b>0.67</b> | <b>-0.04</b> | <b>-0.07</b> | <b>0.00</b> |
| Sal                             | 0.42        | 0.46         | -0.10        | 1.02        | <b>D</b>                         | <b>0.66</b> | <b>-0.02</b> | <b>-0.04</b> | <b>0.00</b> |
| Pb                              | 0.21        | -0.03        | -0.08        | 0.03        | Chl                              | 0.49        | 0.03         | 0.00         | 0.05        |
| Zn                              | 0.20        | -0.02        | -0.07        | 0.03        | WT                               | 0.24        | -0.24        | -0.64        | 0.16        |
| WT                              | 0.15        | 0.22         | -0.38        | 0.81        | MD                               | 0.23        | -0.03        | -0.09        | 0.02        |
| DO                              | 0.14        | 0.03         | -0.08        | 0.15        | Zn                               | 0.17        | -0.01        | -0.06        | 0.05        |
| Tur                             | 0.12        | 0.00         | -0.05        | 0.05        | DO                               | 0.13        | 0.02         | -0.05        | 0.10        |
| Chl                             | 0.12        | 0.00         | -0.04        | 0.05        | Tur                              | 0.13        | -0.01        | -0.05        | 0.03        |
| MD                              | 0.11        | 0.00         | -0.09        | 0.08        | Sal                              | 0.11        | -0.05        | -0.43        | 0.34        |



Table 4.

| Environmental Variables | GVIF    | Df | GVIF <sup>1/2Df</sup> |
|-------------------------|---------|----|-----------------------|
| Chl                     | 7.40    | 1  | 2.72                  |
| D                       | 6.41    | 1  | 2.53                  |
| DO                      | 4.49    | 1  | 2.12                  |
| MD                      | 3.72    | 1  | 1.93                  |
| Sal                     | 9.43    | 1  | 3.07                  |
| Tur                     | 6.67    | 1  | 2.58                  |
| Pb                      | 9.98    | 1  | 3.16                  |
| Zn                      | 10.05   | 1  | 3.17                  |
| WT                      | 2.39    | 1  | 1.55                  |
| R                       | 1266.30 | 9  | 1.49                  |



Table 5

| Taxa                                  | Chl | D | DO | MD | Sal | Tur | WT | Pb | Zn | R |
|---------------------------------------|-----|---|----|----|-----|-----|----|----|----|---|
| <i>Sinocytheridea impressa</i>        | +   |   | -  | +  | -   |     |    |    |    |   |
| <i>Neomonoceratina delicata</i>       |     |   |    |    | +   | +   |    |    | +  |   |
| <i>Pistocythereis bradyi</i>          |     | - |    |    | +   |     |    | -  |    |   |
| <i>Bicornucythere bisanensis</i> s.l. |     | - |    |    |     |     |    |    |    |   |
| <i>Keijella kloempitensis</i>         |     | + |    |    |     |     |    |    |    |   |
| <i>Nipponocythere bicarinata</i>      | -   |   |    |    |     |     |    |    |    |   |
| <i>Spinileberis quadriaculeata</i>    | +   |   |    |    |     | -   |    |    |    |   |
| <i>Loxoconcha malayensis</i>          |     |   | -  | -  |     |     |    |    |    |   |
| <i>Neosinocythere elongata</i>        |     |   |    |    |     | +   |    |    |    |   |
| <i>Stigmatocythere roesmani</i>       |     |   |    |    |     |     |    | -  |    |   |
| <i>Phlyctocythere japonica</i>        |     | + |    |    |     |     |    |    |    |   |
| <i>Alocopocythere goujoni</i>         |     |   |    |    | +   |     |    |    |    |   |
| <i>Hemikrithe orientalis</i>          |     | + |    |    |     |     |    |    |    |   |
| <i>Loxoconcha epeterseni</i>          |     | + |    |    |     | -   |    |    |    |   |
| <i>Hemicytheridea reticulata</i>      |     | - |    |    |     |     |    | -  |    |   |
| <i>Neonesidea</i> spp.                |     |   | +  |    |     |     |    |    |    |   |
| <i>Propontocypris</i> spp.            | -   |   |    |    |     |     |    |    |    |   |
| <i>Xestoleberis</i> spp.              |     |   | +  | -  |     | -   |    |    |    |   |
